# Supplementary material
Source: Research Square preprint supplement (doi:10.21203/rs.3.rs-9641247/v1)
Supplement: Supplementary file 1 [file e033dba588e90af217ba40b1.docx]

Supplementary Information

# Fragment screenings afford inhibitors of SARS-CoV-2 non-structural protein 10

## Authors

Hugo Scherer[1](#affiliation1),[2](#affiliation2),[3](#affiliation3), Pietro Vincenzi[1](#affiliation1), Natalie M. Köhler[4](#affiliation4), Margarida Saramago[5](#affiliation5), Dominik Kolling[1](#affiliation1),[2](#affiliation2),[3](#affiliation3),[6](#affiliation6), Alexander Voltz[1](#affiliation1),[2](#affiliation2),[3](#affiliation3), Ravindra P. Jumde[1](#affiliation1), Antonia P. Gunesch[4](#affiliation4), Marta V. Cunha[5](#affiliation5), Sebastian Adam[1](#affiliation1), Nicolas Frank[1](#affiliation1),[2](#affiliation2),[3](#affiliation3), Christina Grethe[4](#affiliation4), Gwenaëlle Jézéquel[1](#affiliation1), Rute G. Matos[5](#affiliation5), Kai Schließmann[1](#affiliation1),[2](#affiliation2),[3](#affiliation3), Rolf Müller[1](#affiliation1),[2](#affiliation2),[3](#affiliation3), Jesko Koehnke[6](#affiliation6), Cecília M. Arraiano[5](#affiliation5), Thomas Pietschmann[4](#affiliation4),[7](#affiliation7),[8](#affiliation8),[9](#affiliation9) and Anna K. H. Hirsch[1](#affiliation1),[2](#affiliation2),[3](#affiliation3),[*](#correspondingauthor)

#### Affiliations

1Helmholtz-Institut für Pharmazeutische Forschung Saarland (HIPS) – Helmholtz-Zentrum für Infektionsforschung (HZI), 66123 Saarbrücken, Germany

2Universität des Saarlandes, Naturwissenschaftlich-Technische Fakultät, Fachrichtung Pharmazie, 66123 Saarbrücken, Germany

3PharmaScienceHub (PSH), Universität des Saarlandes, 66123 Saarbrücken, Germany

4TWINCORE, Zentrum für Experimentelle und Klinische Infektionsforschung, Experimentelle Virologie, 30625 Hannover, Germany

5ITQB NOVA, Instituto de Tecnologia Química e Biológica António Xavier, Universidade Nova de Lisboa, 2780-157 Oeiras, Portugal

6Leibniz Universität Hannover, Institut für Lebensmittelchemie (LCI), 30167 Hannover, Germany

7Deutsches Zentrum für Infektionsforschung (DZIF), Hannover–Braunschweig Partner Site, 30625 Hannover, Germany

8Deutsches Zentrum für Lungenforschung (DZL), BREATH Faculty, 30625 Hannover, Germany

9Exzellenzcluster RESIST (EXC 2155), Medizinische Hochschule Hannover (MHH), 30625 Hannover, Germany

*Corresponding author, email address: anna.hirsch@helmholtz-hips.de

#### Present addresses

Ravindra P. Jumde: Global Antibiotic Research & Development Partnership (GARDP), 1202 Geneva, Switzerland

Gwenaëlle Jézéquel: Laboratoire de Chimie de Coordination (UPR CNRS 8241), Centre National de la Recherche Scientifique (CNRS), Université Toulouse III–Paul Sabatier (UPS), 31077 Toulouse, France

## Table of contents

[Supplementary Methods 4](#_Toc224738129)

[Recombinant expression and purification of severe acute respiratory syndrome coronavirus 2 (SARS-CoV-2) non-structural protein 10 (Nsp10) 4](#_Toc224738130)

[Amino acid sequence of recombinantly expressed Nsp10 4](#_Toc224738131)

[Amino acid sequence after tobacco etch virus (TEV) cleavage and His-tag removal 4](#_Toc224738132)

[Surface plasmon resonance (SPR) 4](#_Toc224738133)

[Chemistry 4](#_Toc224738134)

[1. General Procedures 5](#_Toc224738135)

[1.1. General Procedure A: amide synthesis 5](#_Toc224738136)

[1.2. General Procedure B: Suzuki–Miyaura cross-coupling 5](#_Toc224738137)

[1.3. General Procedure C: Suzuki–Miyaura cross-coupling 6](#_Toc224738138)

[1.4. General Procedure D: amide synthesis 6](#_Toc224738139)

[1.5. General Procedure E: amide synthesis 6](#_Toc224738140)

[1.6. General Procedure F: carbamate synthesis 7](#_Toc224738141)

[1.7. General Procedure G: amide synthesis 7](#_Toc224738142)

[1.8. General Procedure H: reductive amination 7](#_Toc224738143)

[2. Compound characterisation 7](#_Toc224738144)

[Supplementary Figures 81](#_Toc224738145)

[Supplementary Fig. 1: Preliminary dual-luciferase assay measuring residual infectivity and cell viability in human coronavirus 229E (HCoV-229E)-infected cells. 81](#_Toc224738146)

[Supplementary Fig. 2: Near-native mass spectrometry (MS) reveals binding of fragment 4 to severe acute respiratory syndrome coronavirus 2 (SARS-CoV-2) non-structural protein 10 (Nsp10). 81](#_Toc224738147)

[Supplementary Fig. 3: Docking poses of fragments 4 and 9 suggest distinct interaction sites on severe acute respiratory syndrome coronavirus 2 (SARS-CoV-2) non-structural protein 10 (Nsp10). 82](#_Toc224738148)

[Supplementary Fig. 4: Docking results of the virtual libraries generated with severe acute respiratory syndrome coronavirus 2 (SARS-CoV-2) non-structural protein 10 (Nsp10). 82](#_Toc224738149)

[Supplementary Fig. 5: Initial screening for evaluation of the inhibition of severe acute respiratory syndrome coronavirus 2 (SARS-CoV-2) non-structural protein 14 (Nsp14) exoribonuclease (ExoN) activity. 83](#_Toc224738150)

[Supplementary Fig. 6: Screening of compounds for antiviral activity against human coronavirus 229E (HCoV-229E) and cytotoxicity. 83](#_Toc224738151)

[Supplementary Fig. 7: Near-native mass spectrometry (MS) reveals binding of compound 37 to severe acute respiratory syndrome coronavirus 2 (SARS-CoV-2) non-structural protein 10 (Nsp10). 84](#_Toc224738152)

[Supplementary Fig. 8: Screening of compounds for antiviral activity against severe acute respiratory syndrome coronavirus 2 (SARS-CoV-2). 85](#_Toc224738153)

[Supplementary Notes 86](#_Toc224738154)

[List of Abbreviations 86](#_Toc224738155)

## Supplementary Methods

### Recombinant expression and purification of severe acute respiratory syndrome coronavirus 2 (SARS-CoV-2) non-structural protein 10 (Nsp10)

#### Amino acid sequence of recombinantly expressed Nsp10

MGSSHHHHHHSSGENLYFQGAGNATEVPANSTVLSFCAFAVDAAKAYKDYLASGGQPITNCVKMLCTHTGTGQAITVTPEANMDQESFGGASCCLYCRCHIDHPNPKGFCDLKGKYVQIPTTCANDPVGFTLKNTVCTVCGMWKGYGCSCDQLREPMLQ*.

#### Amino acid sequence after tobacco etch virus (TEV) cleavage and His-tag removal

GAGNATEVPANSTVLSFCAFAVDAAKAYKDYLASGGQPITNCVKMLCTHTGTGQAITVTPEANMDQESFGGASCCLYCRCHIDHPNPKGFCDLKGKYVQIPTTCANDPVGFTLKNTVCTVCGMWKGYGCSCDQLREPMLQ*.

### Surface plasmon resonance (SPR)

SPR screenings were conducted using 96-well plates including test compounds (C), blank buffer injections (B), and ethylene glycol reference injections (EG). The plate layout was used as described in the table below.

|  | 1 | 2 | 3 | 4 | 5 | 6 | 7 | 8 | 9 | 10 | 11 | 12 |
| --- | --- | --- | --- | --- | --- | --- | --- | --- | --- | --- | --- | --- |
| A | B | C | B | C | B | C | B | C | B | C | B | B |
| B | B | C | B | C | B | C | B | C | B | C | B | B |
| C | B | C | B | C | B | C | B | C | B | C | B | B |
| D | B | C | B | C | B | C | B | C | B | C | B | B |
| E | B | C | B | C | B | C | B | C | B | C | B | B |
| F | B | C | B | C | B | C | B | C | B | C | B | B |
| G | B | C | B | C | B | C | B | C | B | C | B | B |
| H | B | C | B | C | B | C | B | C | EG | B | B | B |

### Chemistry

All reagents and solvents were obtained from commercial suppliers and used without further purification unless otherwise stated.

NMR data were collected on a Bruker Avance Neo 500 MHz (1H at 500 MHz; 13C at 126 MHz; 19F at 470 MHz), equipped with a CryoProbe Prodigy in CDCl3 or DMSO-*d*6 unless otherwise specified. Chemical shifts are given in parts per million (ppm) and referenced against the residual proton or carbon resonances of the > 99% deuterated solvents as internal standard. Coupling constants (*J*) are given in Hertz (Hz). Data are reported as follows: chemical shift, multiplicity (s = singlet, d = doublet, t = triplet, q = quartet, quint = quintet, sext = sextet, sept = septet, m = multiplet, dd = doublet of doublets, dt = doublet of triplets, ddd = doublet of doublets of doublets, td = triplet of doublets, br = broad and combinations of these), coupling constants and integration. NMR spectra were evaluated using ACD/Labs 2021.2.0 (Advanced Chemistry Development, Toronto, ON, Canada) or TopSpin 5.0.0 (Bruker, Billerica, MA, USA).

Liquid chromatography–mass spectrometry (LC–MS) was performed on an LC–MS system consisting of a Dionex UltiMate 3000 pump, autosampler, column compartment, detector (Thermo Fisher Scientific, Dreieich, Germany) and ESI quadrupole MS (MSQ Plus or ISQ EC, Thermo Fisher Scientific, Dreieich, Germany). The purity of the final compounds was determined by LC–MS using a gradient with A: H2O + 0.1% formic acid (FA) to B: MeCN + 0.1% FA at a flow rate of 600 μL/min and 45 °C. The column was equilibrated with 5% B for 1.0 min and the gradient was initiated starting at 5% B to 100% B in 4.2 min, followed by a 0.8 min isocratic step at 100% B, to end up with a decrease until 50% B in 0.1 min, before re-equilibration under the initial conditions. The purity of the final compounds was determined by using the area percentage method on the ultraviolet (UV) trace recorded at a wavelength of 254 nm. LC–MS spectra were evaluated using Chromeleon 7.2 (Thermo Fisher Scientific, Dreieich, Germany).

High-resolution mass spectrometry (HRMS) of final products was determined by LC–MS/MS using a Thermo Scientific Q Exactive Focus Orbitrap LC–MS/MS system (Waltham, MA, USA). HRMS spectra were evaluated using XCalibur 3.0.63 (Thermo Fisher Scientific, Dreieich, Germany).

#### General Procedures

##### General Procedure A: amide synthesis

To a solution of carboxylic acid (1.1 eq) in DMF (0.2 M) were added DIPEA (3.0 eq), EDC·HCl (2.0 eq), HOBt (2.0 eq), followed by the amine (1.0 eq). The reaction mixture was stirred at room temperature overnight. Upon completion, the reaction mixture was diluted with water (10 mL), extracted with dichloromethane (3 × 10 mL), dried over MgSO4, and concentrated under reduced pressure. The crude product was purified by normal-phase flash chromatography on silica gel using a gradient of cyclohexane/ethyl acetate or dichloromethane/methanol to afford the desired amide.

##### General Procedure B: Suzuki–Miyaura cross-coupling

To a microwave vial were added the aryl halide (1.0 eq), boronic acid (1.2 eq), K2CO3 (3.0 eq), and Pd(PPh3)4 (5 %mol). The vial was sealed, evacuated and backfilled with Ar (three times), then a degassed mixture of 1,4-dioxane/H2O (3:1, 0.1 M) was added. The resulting mixture was further degassed by sparging with Ar for 30 min, after which the vial was resealed and heated at 120 °C for 30 min under microwave irradiation. The reaction mixture was cooled to room temperature, filtered through a pad of Celite, and washed with dichloromethane (10 mL). The combined filtrate was diluted with water (10 mL), extracted with dichloromethane (3 × 10 mL), dried over MgSO4, and concentrated under reduced pressure. The crude product was purified by normal-phase flash chromatography on silica gel using a gradient of dichloromethane/methanol + 5% triethylamine to afford the desired product.

##### General Procedure C: Suzuki–Miyaura cross-coupling

To a microwave vial were added the aryl halide (1.0 eq), boronic acid (2.5 eq), K2CO3 (4.0 eq), and Pd(dppf)Cl2 (5 %mol). The vial was sealed, evacuated and backfilled with N2 (three times), then a degassed mixture of 1,4-dioxane/H2O (6:1, 0.5 M) was added. The resulting mixture was further degassed by sparging with N2 for 30 min, after which the vial was resealed and heated at 80–100 °C for 30–120 min under microwave irradiation. The reaction mixture was cooled to room temperature, filtered through a pad of Celite, and washed with dichloromethane (20 mL). The combined filtrate was diluted with water (20 mL), extracted with dichloromethane (3 × 20 mL), dried over MgSO4, and concentrated under reduced pressure. The crude product was purified by reversed-phase flash chromatography on C18 silica gel using a gradient of water/acetonitrile + 1% formic acid to afford the desired product as a salt.

##### General Procedure D: amide synthesis

To a solution of carboxylic acid (1.2 eq) in DMF (0.2 M) were added triethylamine (3.0 eq), EDC·HCl (2.0 eq), HOBt hydrate (2.0 eq), followed by the amine (1.0 eq). The reaction mixture was stirred at room temperature overnight. Upon completion, the reaction mixture was diluted with ethyl acetate (10 mL), washed with a cold mixture of water/brine (1:1, 3 × 10 mL) and brine (10 mL), dried over MgSO4, and concentrated under reduced pressure. The crude product was purified by reversed-phase preparative HPLC using a gradient of water/acetonitrile + 0.05% formic acid to afford the desired amide.

##### General Procedure E: amide synthesis

To a solution of carboxylic acid (1.2 eq) in DCM (0.2 M) were added triethylamine (4.0 eq) and the amine (1.0 eq). The reaction mixture was stirred under N2 in an ice bath for 15 min, then propylphosphonic anhydride (50% in EtOAc, 2.0 eq) was added dropwise to the reaction mixture. Upon completion, the reaction mixture was diluted with ethyl acetate (10 mL), washed with saturated NaHCO3 (2 × 10 mL) and water (10 mL). The combined aqueous phases were back-extracted with ethyl acetate (2 × 15 mL). All organic phases were combined, dried over MgSO4, and concentrated under reduced pressure. The crude product was purified by normal-phase flash chromatography on silica gel using a gradient of cyclohexane/ethyl acetate or dichloromethane/methanol to afford the desired amide.

##### General Procedure F: carbamate synthesis

To a solution of chloroformate (1.5 eq) in DCM (0.2 M) were added triethylamine (3.0 eq) and the amine (1.0 eq). The reaction mixture was stirred at room temperature overnight. Upon completion, the reaction mixture was diluted with DCM (10 mL), washed with 1 M HCl (10 mL) and water (10 mL). The combined aqueous phases were back-extracted with dichloromethane (10 mL). All organic phases were combined, dried over MgSO4, and concentrated under reduced pressure. The crude product was purified by normal-phase flash chromatography on silica gel using a gradient of cyclohexane/ethyl acetate to afford the desired carbamate.

##### General Procedure G: amide synthesis

To a solution of acyl chloride (1.5 eq) in DCM (0.2 M) were added triethylamine (3.0 eq) and the amine (1.0 eq). The reaction mixture was stirred at room temperature overnight. Upon completion, the reaction mixture was diluted with DCM (10 mL), washed with 1 M HCl (10 mL) and water (10 mL). The combined aqueous phases were back-extracted with dichloromethane (10 mL). All organic phases were combined, dried over MgSO4, and concentrated under reduced pressure. The crude product was purified by normal-phase flash chromatography on silica gel using a gradient of dichloromethane/methanol to afford the desired amide.

##### General Procedure H: reductive amination

To a solution of amine (1.0 eq) in DCM (0.2 M) was added the aldehyde (1.5 eq). The reaction mixture was stirred at room temperature for 15 min, then sodium triacetoxyborohydride (1.8 eq) was added. Upon completion, the reaction mixture was diluted with NaHCO3 (10 mL) and extracted with dichloromethane (3 × 10 mL). The combined organic phases were washed with a cold mixture of water/brine (1:1, 2 × 15 mL), dried over MgSO4, and concentrated under reduced pressure. The crude product was purified by normal-phase flash chromatography on silica gel using a gradient of cyclohexane/ethyl acetate or dichloromethane/methanol to afford the desired product.

#### Compound characterisation

(4-((4-Bromothiophen-2-yl)methyl)piperazin-1-yl)(1H-indol-5-yl)methanone (14)

Compound **14** was synthesized according to the **General Procedure A** using 1*H*-indole-5-carboxylic acid and 1-((4-bromothiophen-2-yl)methyl)piperazine dihydrochloride (213.44 µmol) as starting materials and purified using cyclohexane/ethyl acetate (13 to 100% ethyl acetate) to yield a white solid (66.1 mg, 66%).

**LC–MS** (ESI): tR = 2.41 min; > 99% purity (UV at 254 nm);

**1H NMR** (500 MHz, CDCl3): *δ* 8.35 (br s, 1H), 7.73 (s, 1H), 7.40 (d, *J* = 8.4 Hz, 1H), 7.28–7.27 (m, 1H), 7.26–7.26 (m, 1H), 7.15 (s, 1H), 6.85 (s, 1H), 6.60–6.59 (m, 1H), 4.00–3.42 (m, 6H), 2.62–2.44 (m, 4H);

**13C NMR** (126 MHz, CDCl3): *δ* 171.7, 143.0, 136.3, 128.4, 127.3, 127.2, 125.3, 122.5, 121.5, 120.3, 110.9, 108.9, 103.3, 56.8, 52.9 (4C);

**HRMS** (ESI+) *m*/*z*: [M+H]+ calculated for C18H18BrN3OS, 404.0427; found, 404.0425.


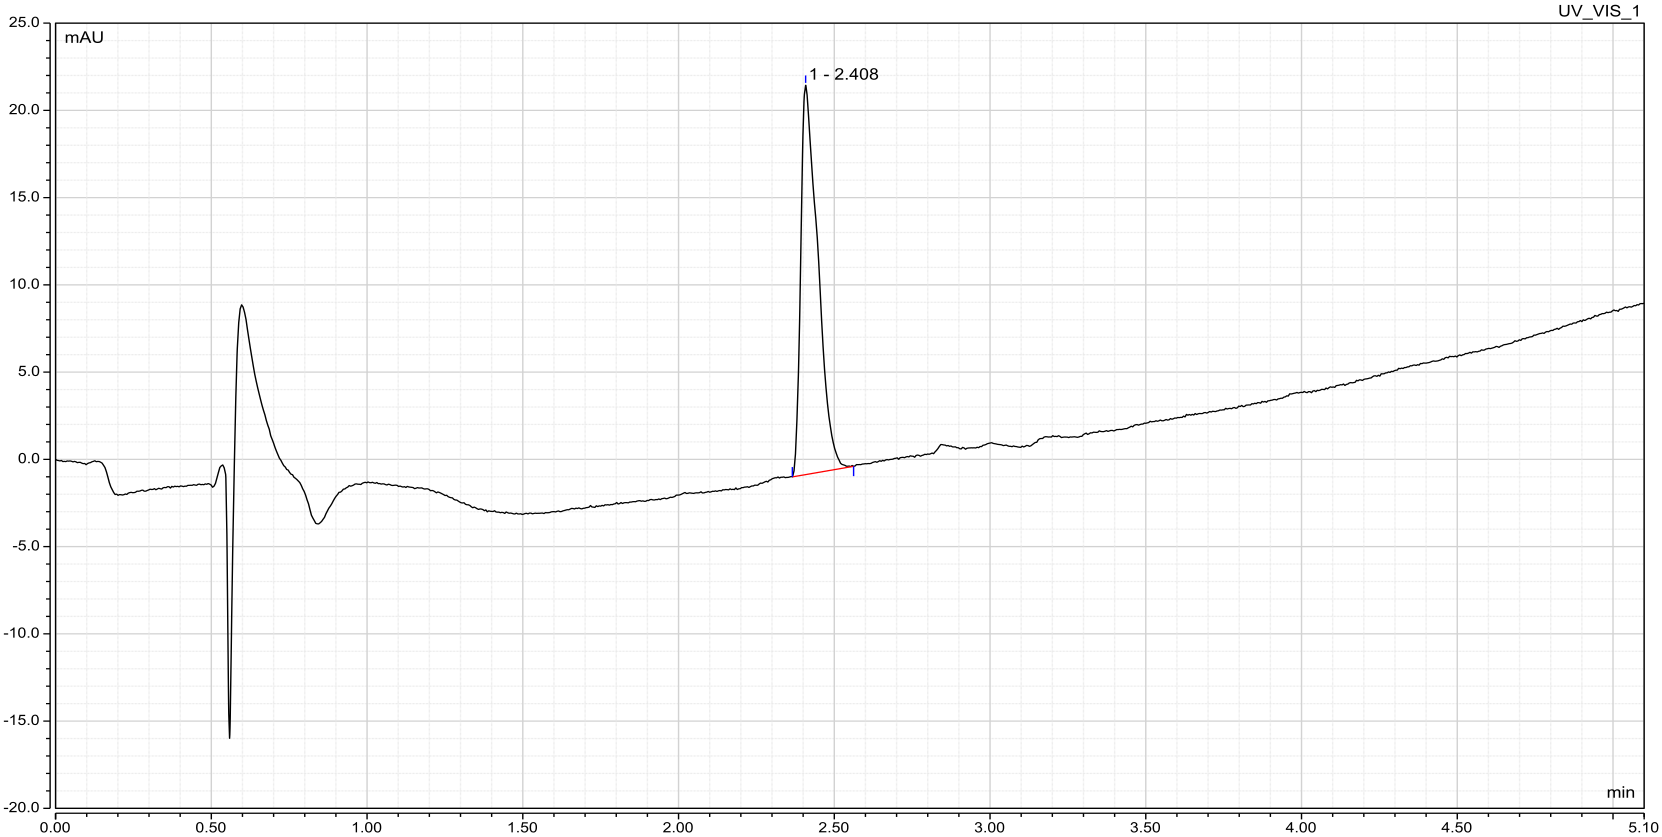


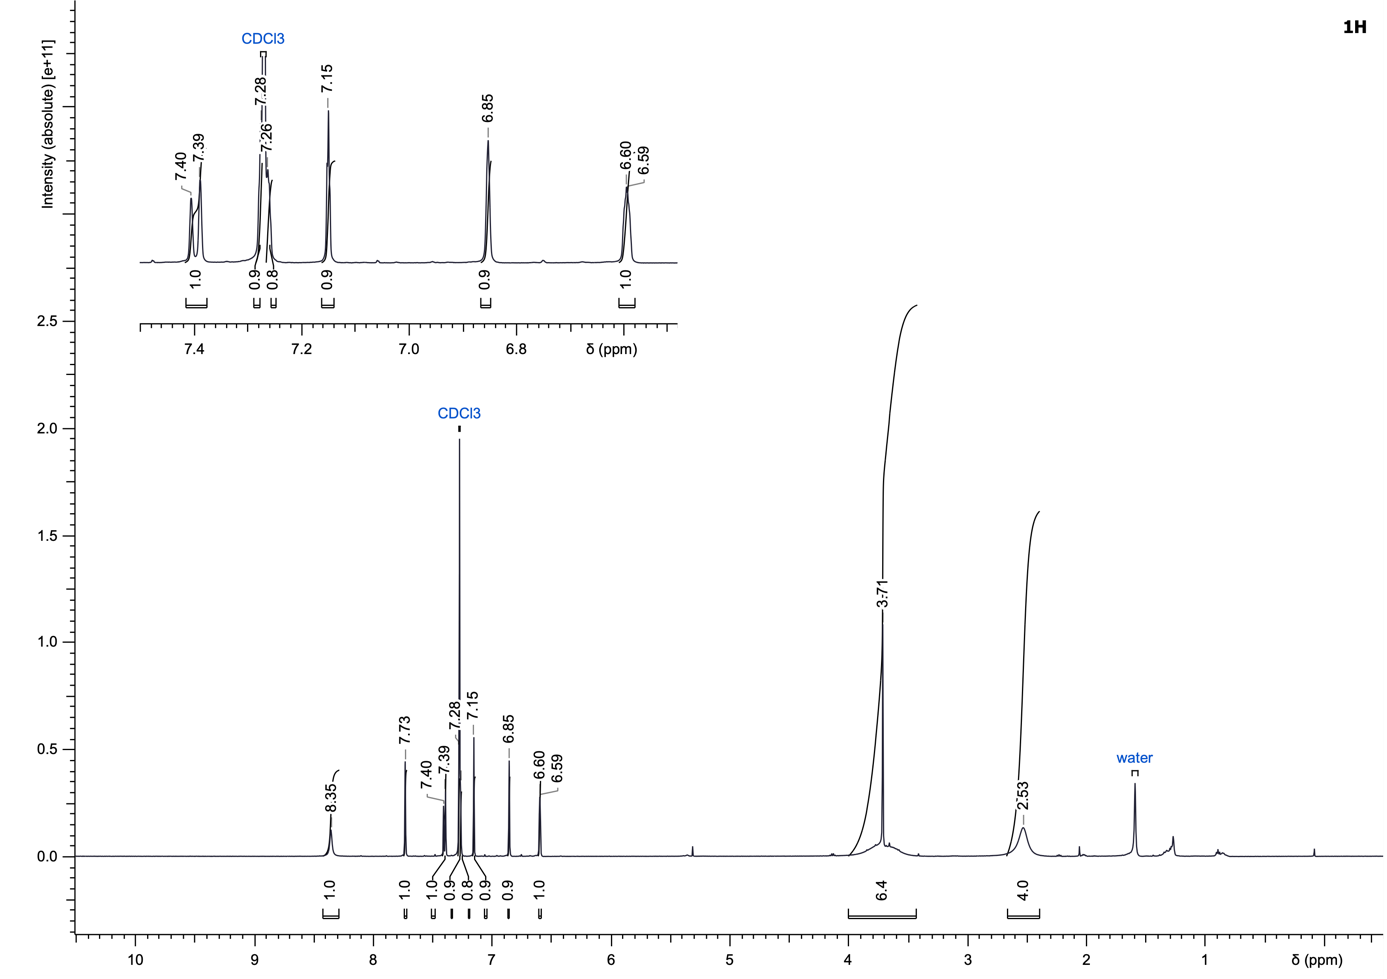


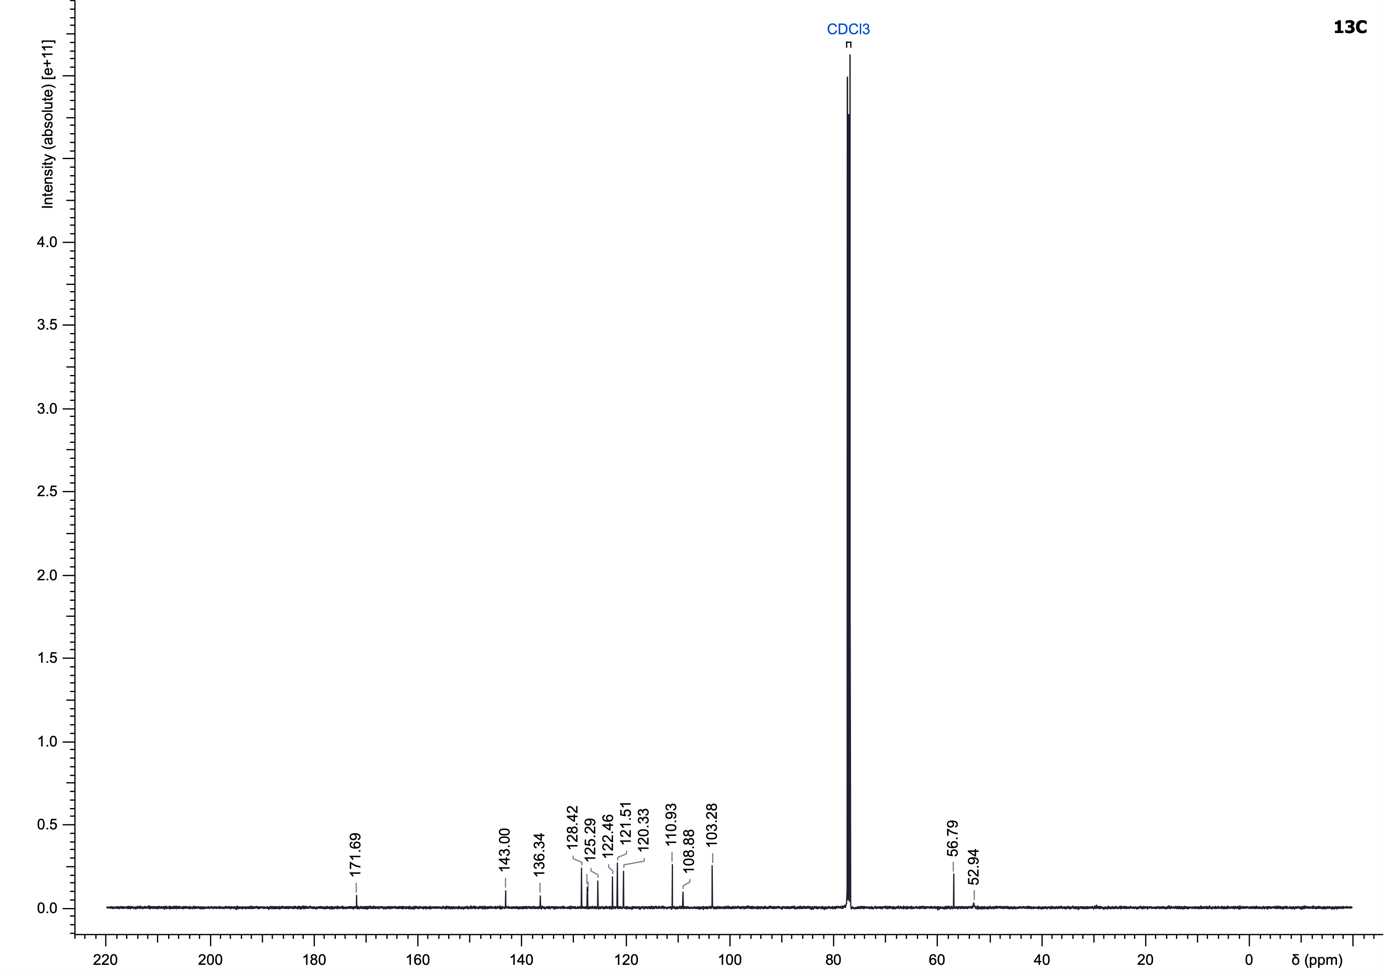


(4-((4-Bromothiophen-2-yl)methyl)piperazin-1-yl)(5-fluoro-1*H*-indol-2-yl)methanone (15)

Compound **15** was synthesized according to the **General Procedure A** using 5-fluoro-1*H*-indole-2-carboxylic acid and 1-((4-bromothiophen-2-yl)methyl)piperazine dihydrochloride (192.01 µmol) as starting materials and purified using cyclohexane/ethyl acetate (13 to 100% ethyl acetate) to yield a yellow solid (34.1 mg, 36%).

**LC–MS** (ESI): tR = 2.82 min; 98% purity (UV at 254 nm);

**1H NMR** (500 MHz, CDCl3): *δ* 9.31 (br s, 1H), 7.36 (dd, *J* = 9.0, 4.3 Hz, 1H), 7.29–7.26 (m, 1H), 7.18 (s, 1H), 7.05 (td, *J* = 9.1, 2.3 Hz, 1H), 6.88 (s, 1H), 6.72 (s, 1H), 3.96 (br s, 4H), 3.74 (s, 2H), 2.60 (t, *J* = 4.9 Hz, 4H);

**13C NMR** (126 MHz, CDCl3): *δ* 161.9, 158.3 (d), 142.7, 132.2, 130.8, 128.6, 127.6 (d), 122.6, 113.4, 112.6, 109.0, 106.1, 105.1, 56.7, 52.7 (4C);

**19F NMR** (470 MHz, DMSO-*d*6): *δ* -123.9;

**HRMS** (ESI+) *m*/*z*: [M+H]+ calculated for C18H17BrFN3OS, 422.0333; found, 422.0330.


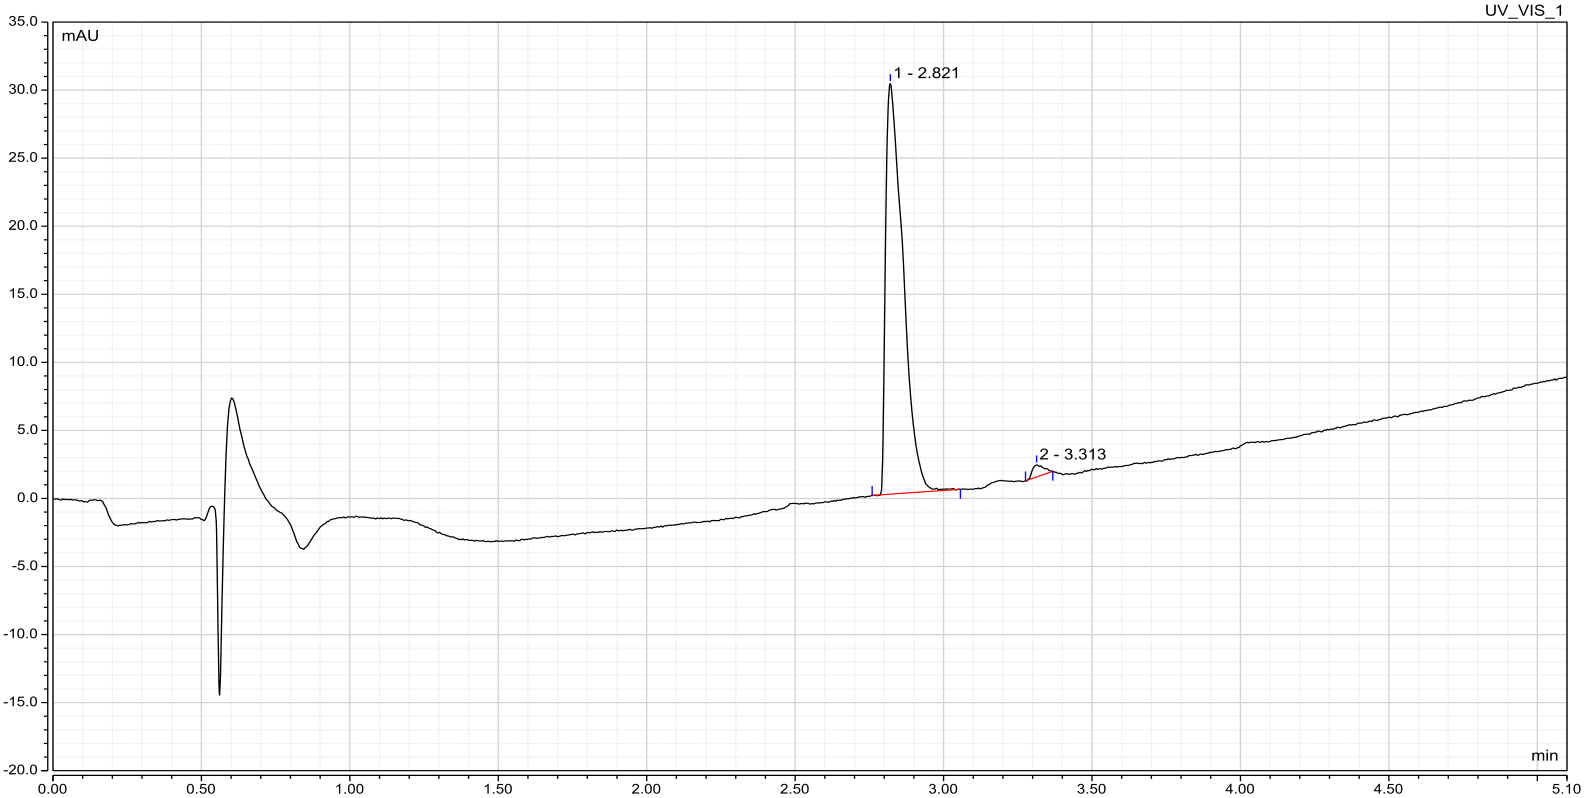


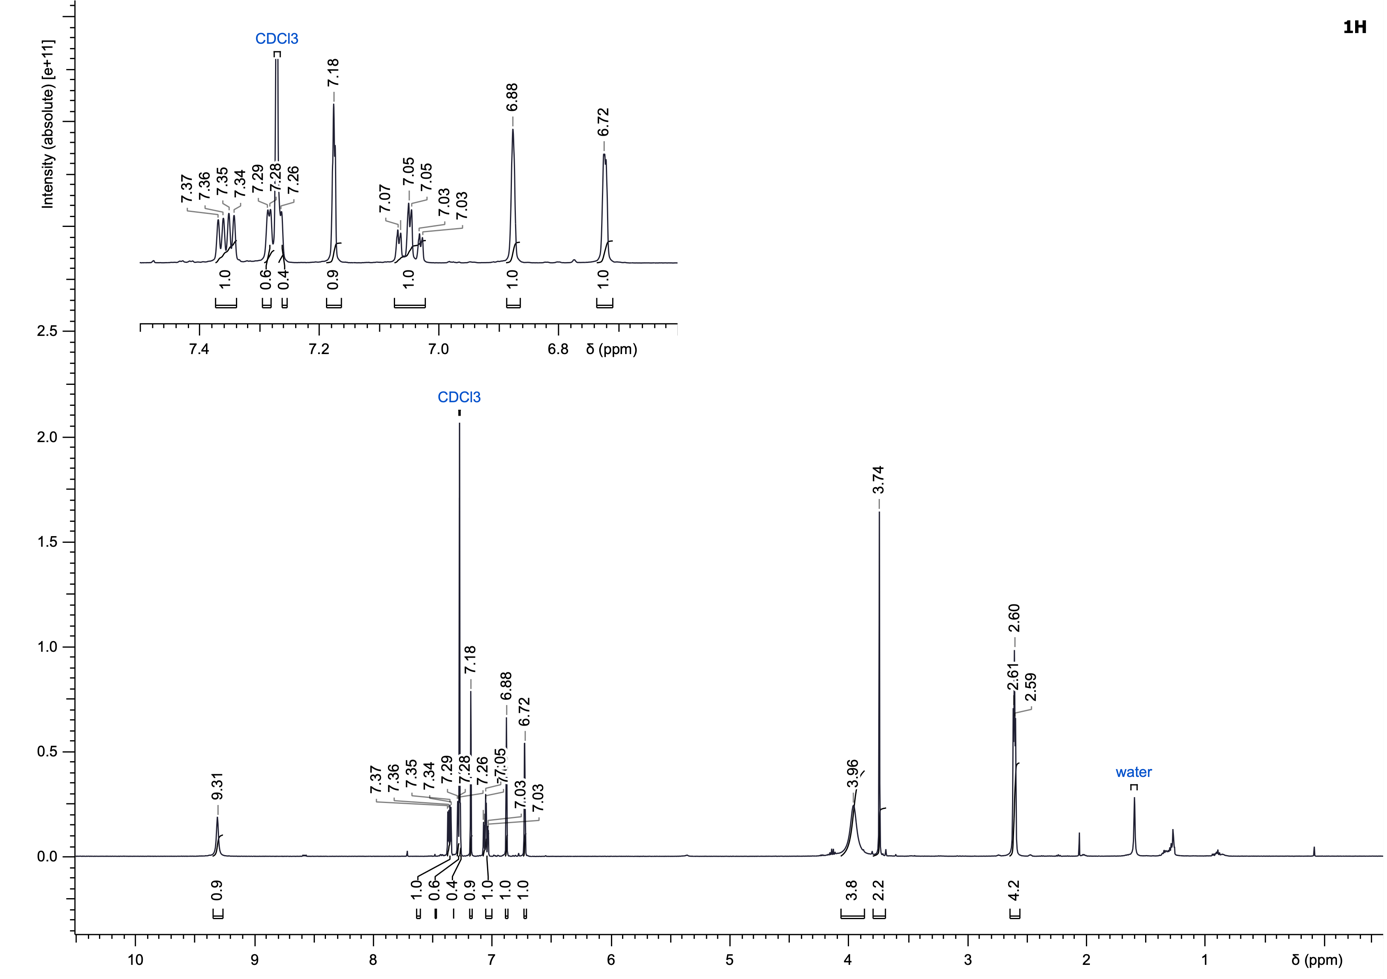


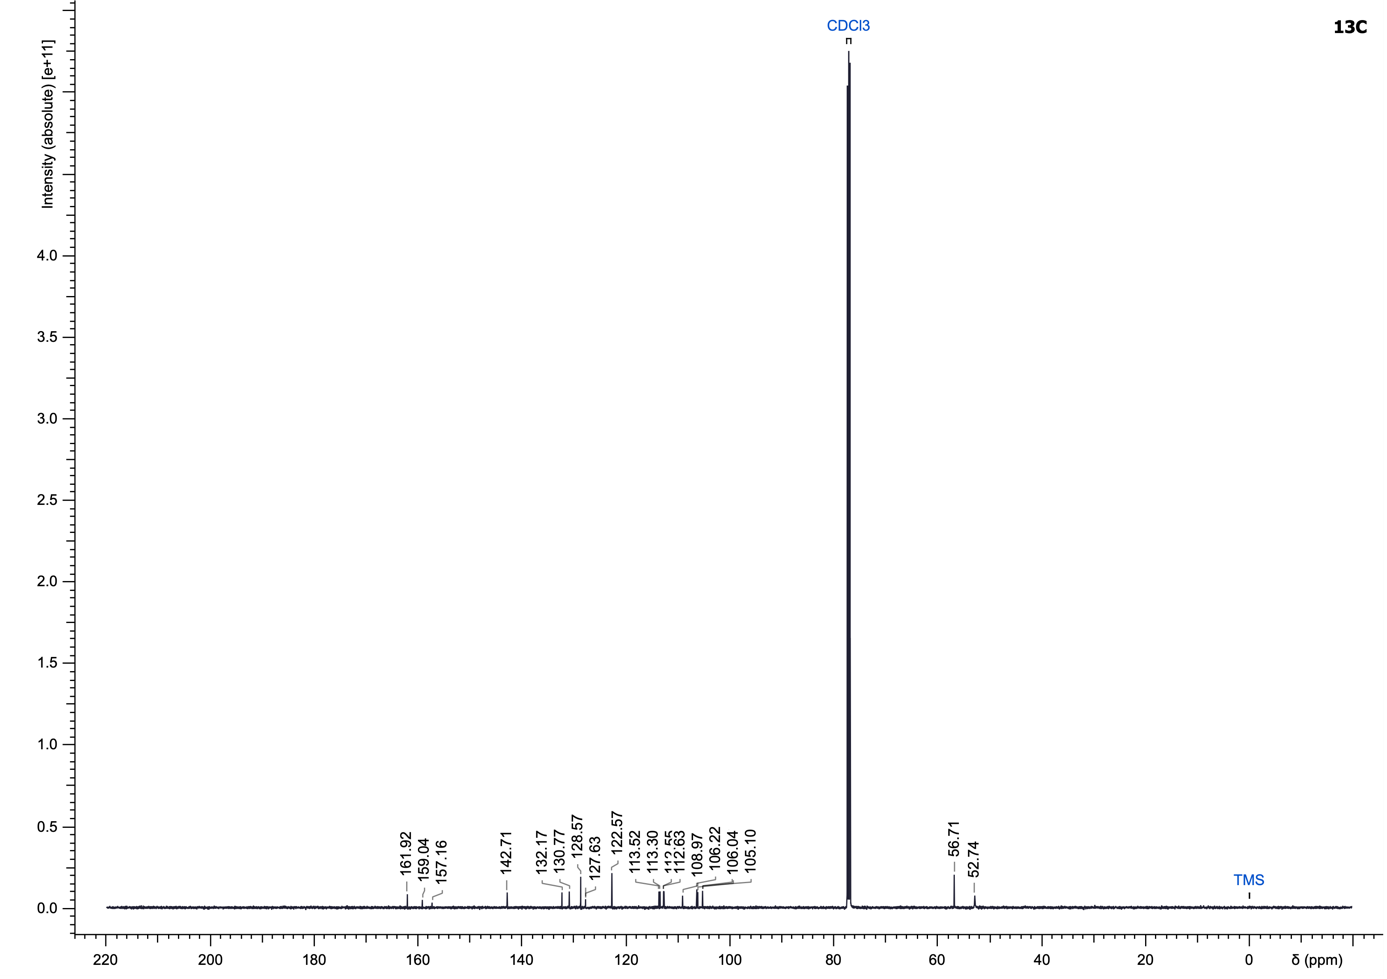


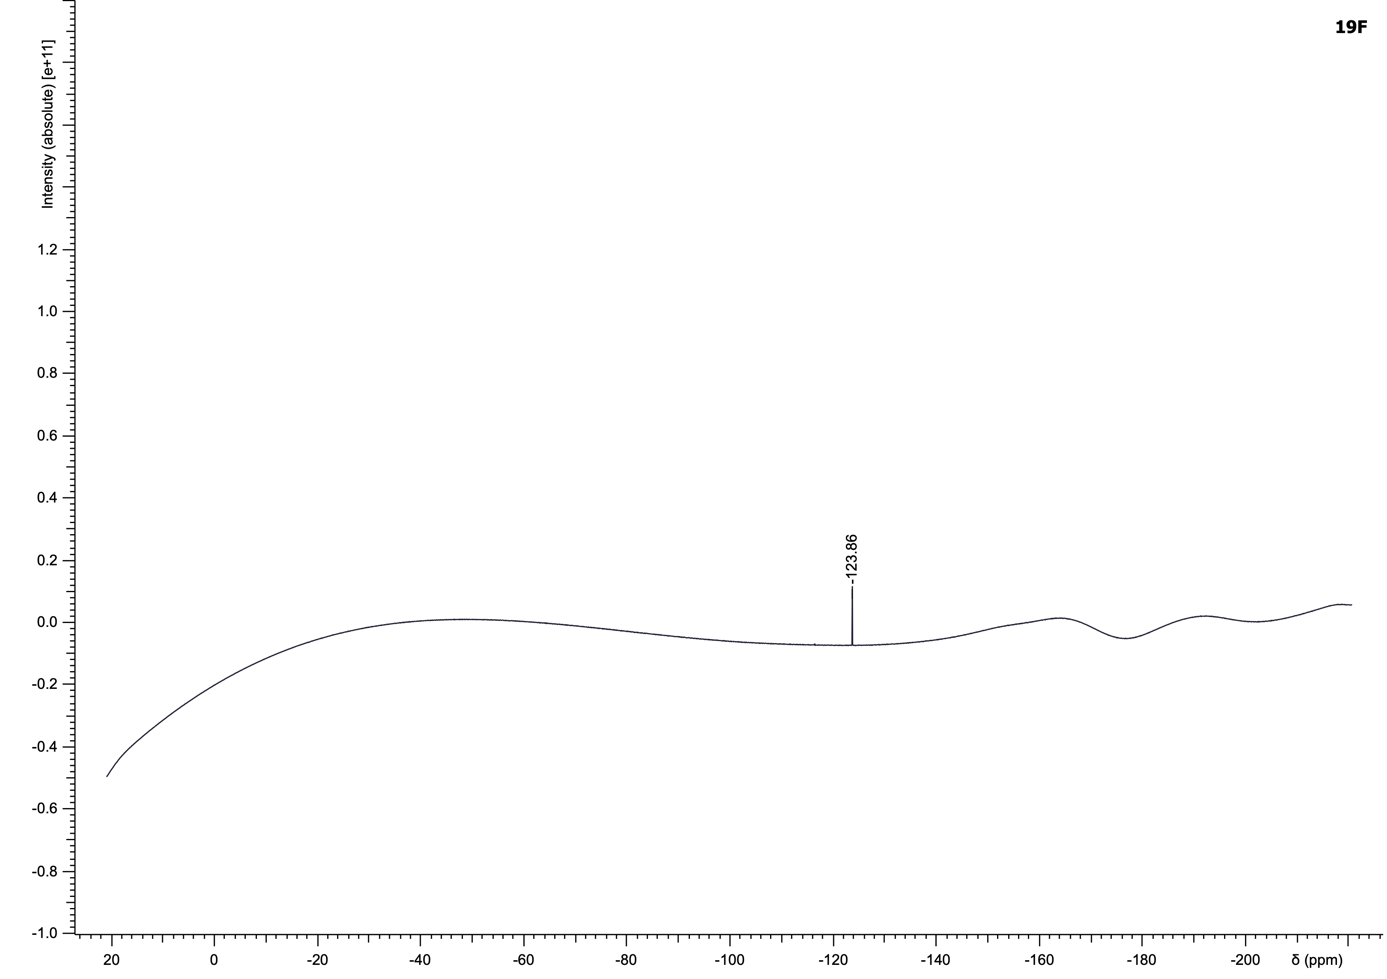


(6-Aminopyridin-3-yl)(4-((4-bromothiophen-2-yl)methyl)piperazin-1-yl)methanone (16)

Compound **16** was synthesized according to the **General Procedure A** using 6-aminonicotinic acid and 1-((4-bromothiophen-2-yl)methyl)piperazine dihydrochloride (249.03 µmol) as starting materials and purified using dichloromethane/methanol (1 to 8% methanol) to yield a white solid (65.6 mg, 59%).

**LC–MS** (ESI): tR = 1.63 min; 97% purity (UV at 254 nm);

**1H NMR** (500 MHz, CDCl3): *δ* 8.19 (s, 1H), 7.56 (dt, *J* = 8.4, 2.4 Hz, 1H), 7.16 (s, 1H), 6.85 (s, 1H), 6.50 (dd, *J* = 8.5, 1.4 Hz, 1H), 3.77–3.54 (m, 6H), 2.52 (br s, 4H);

**13C NMR** (126 MHz, CDCl3): *δ* 168.6, 159.1, 147.9, 142.8, 137.8, 128.5, 122.5, 121.2, 108.9, 107.8, 56.7, 52.7 (4C);

**HRMS** (ESI+) *m*/*z*: [M+H]+ calculated for C15H17BrN4OS, 381.0379; found, 381.0376.


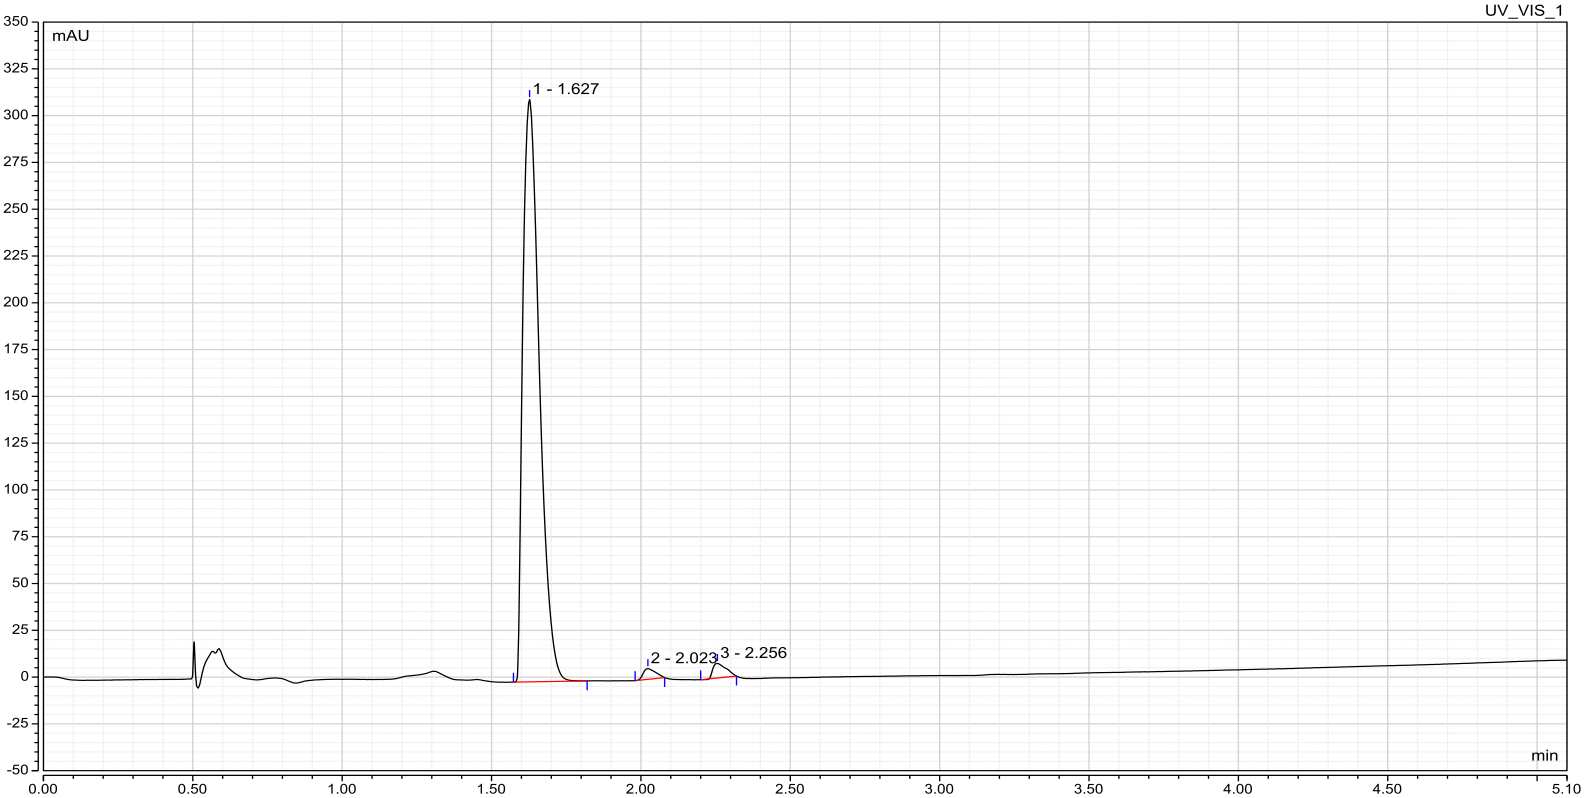


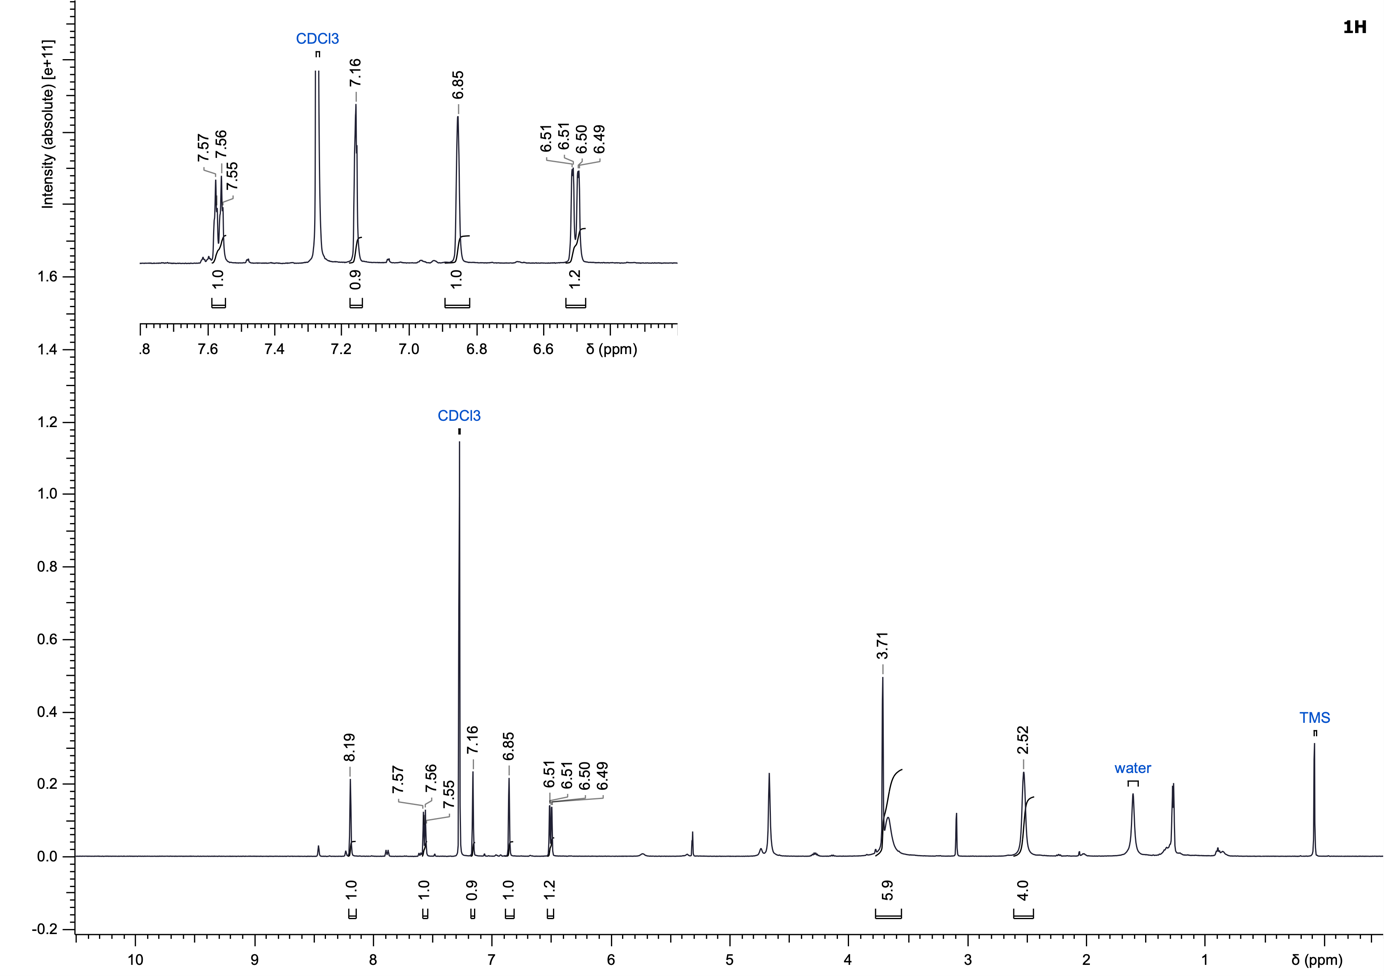


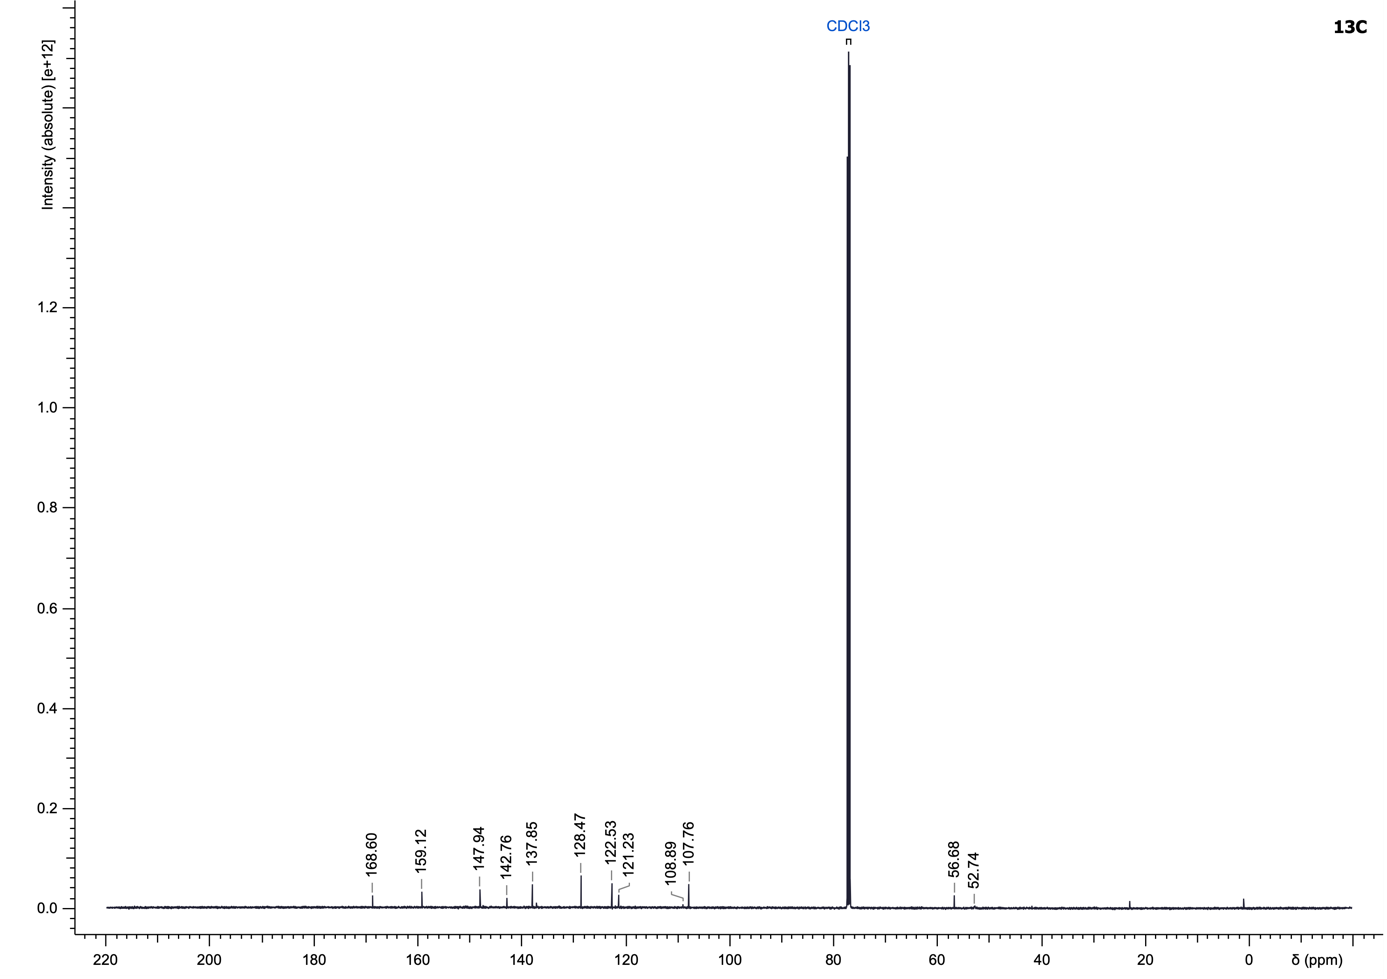


(4-((4-Bromothiophen-2-yl)methyl)piperazin-1-yl)(5-(4-methoxyphenyl)-1*H*-pyrazol-3-yl)methanone (17)

Compound **17** was synthesized according to the **General Procedure A** using 5-(4-methoxyphenyl)-1*H*-pyrazole-3-carboxylic acid and 1-((4-bromothiophen-2-yl)methyl)piperazine dihydrochloride (157.62 µmol) as starting materials and purified using cyclohexane/ethyl acetate (13 to 100% ethyl acetate) to yield a white solid (10.9 mg, 13%).

**LC–MS** (ESI): tR = 2.61 min; > 99% purity (UV at 254 nm);

**1H NMR** (500 MHz, CDCl3): *δ* 10.64 (br s, 1H), 7.61 (d, *J* = 7.8 Hz, 2H), 7.16 (s, 1H), 6.97 (d, *J* = 6.9 Hz, 2H), 6.86 (s, 1H), 6.76 (s, 1H), 3.99 (br s, 2H), 3.90–3.80 (m, 5H), 3.72 (s, 2H), 2.57 (br s, 4H);

**13C NMR** (126 MHz, CDCl3): *δ* 160.0, 142.8, 137.8, 128.5, 127.0 (2C), 123.3, 122.5, 114.4 (2C), 108.9, 103.8, 56.7, 55.4, 52.9 (4C), 46.9, 42.5;

**HRMS** (ESI+) *m*/*z*: [M+H]+ calculated for C20H21BrN4O2S, 461.0641; found, 461.0639.


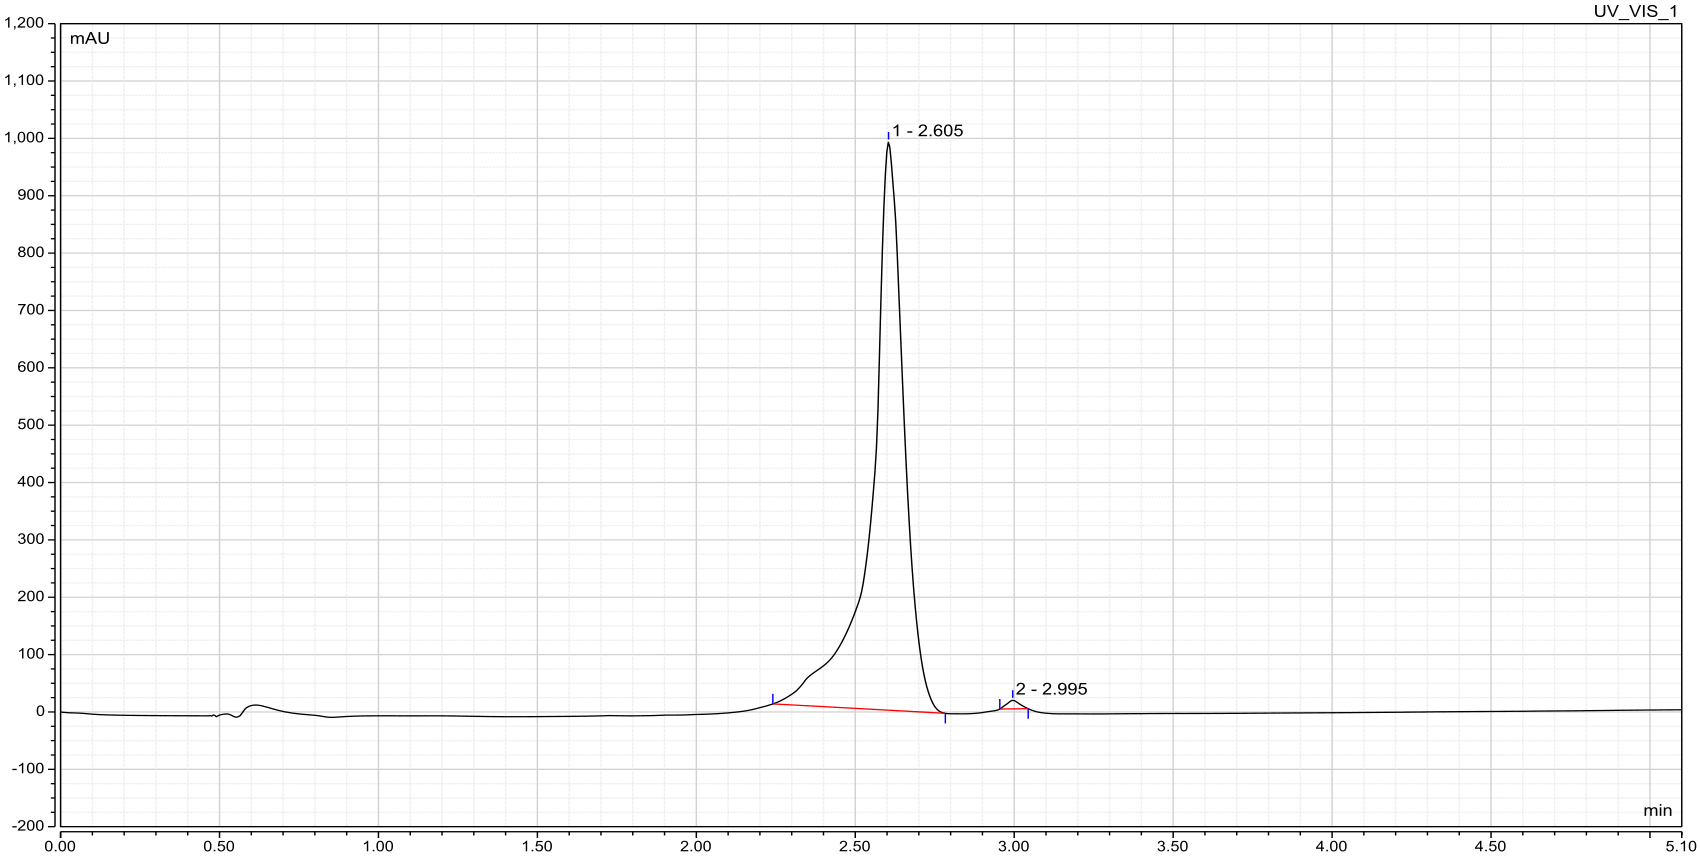


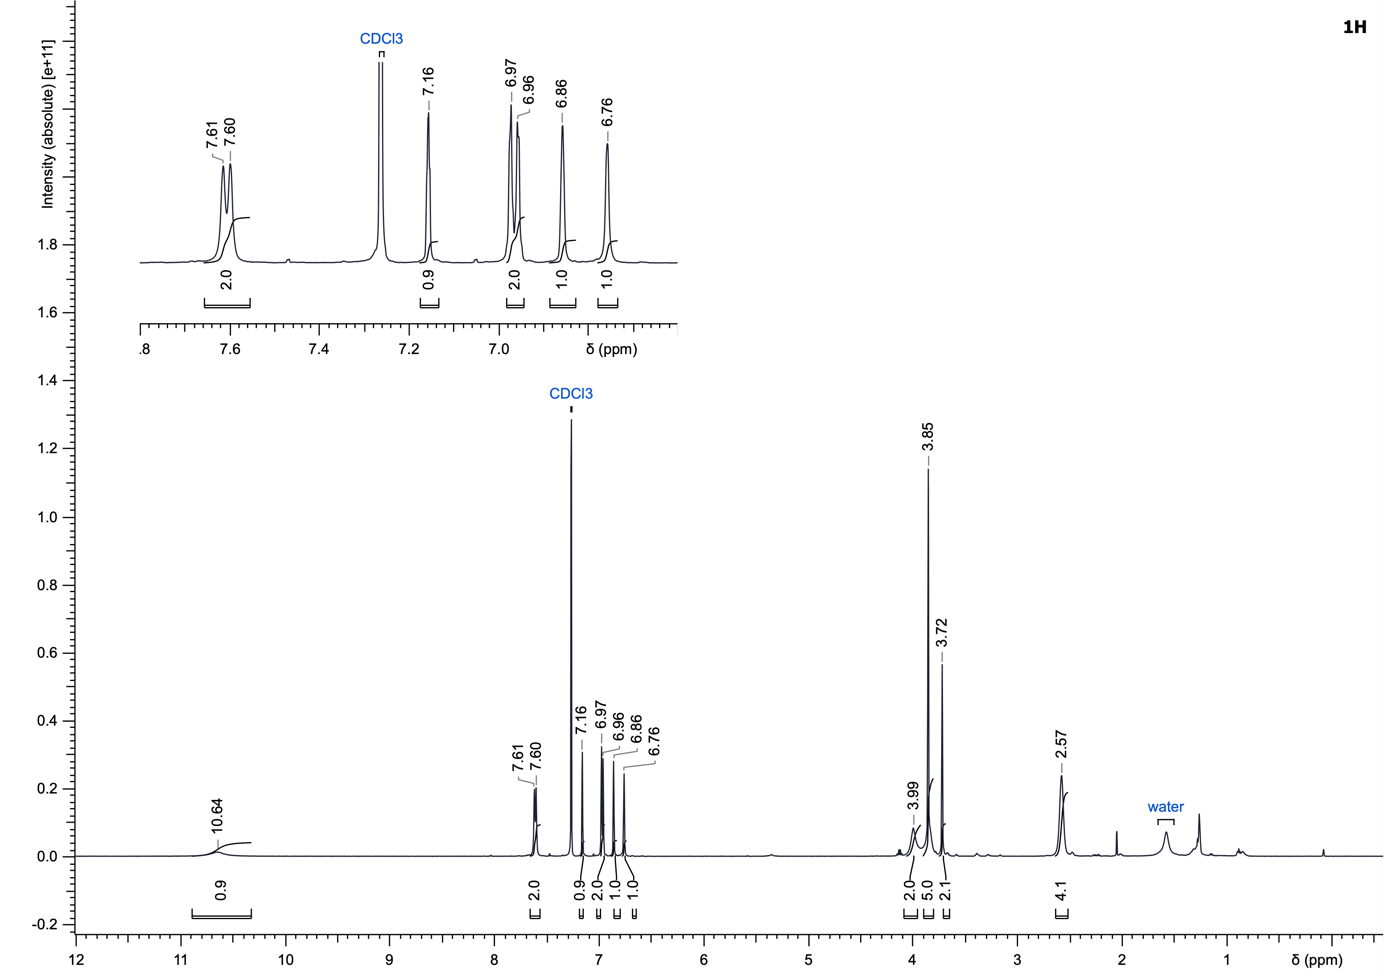


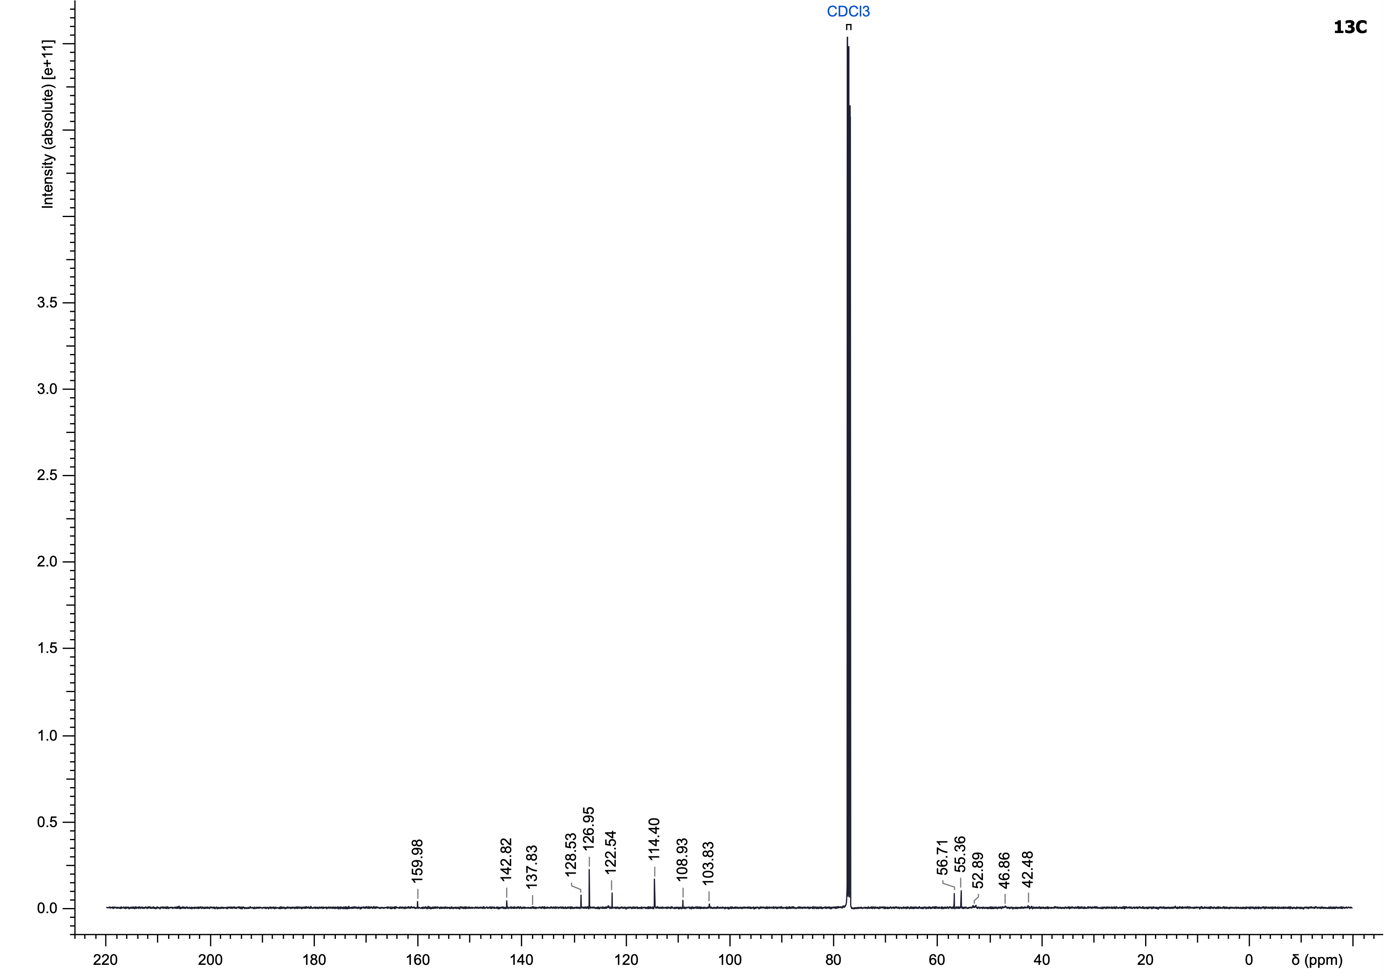


(1*H*-Benzo[*d*]imidazol-2-yl)(4-((4-bromothiophen-2-yl)methyl)piperazin-1-yl)methanone (18)

Compound **18** was synthesized according to the **General Procedure A** using 1*H*-benzo[*d*]imidazole-2-carboxylic acid and 1-((4-bromothiophen-2-yl)methyl)piperazine dihydrochloride (299.31 µmol) as starting materials and purified using cyclohexane/ethyl acetate (10 to 100% ethyl acetate) to yield a yellow solid (50.3 mg, 41%).

**LC–MS** (ESI): tR = 2.53 min; 97% purity (UV at 254 nm);

**1H NMR** (500 MHz, DMSO-*d*6): *δ* 13.13 (s, 1H), 7.73 (d, *J* = 8.1 Hz, 1H), 7.59 (d, *J* = 1.5 Hz, 1H), 7.52 (d, *J* = 8.1 Hz, 1H), 7.31 (td, *J* = 7.5, 1.0 Hz, 1H), 7.25 (td, *J* = 7.6, 0.9 Hz, 1H), 7.02 (s, 1H), 4.52–4.39 (m, 2H), 3.74 (s, 2H), 3.73–3.70 (m, 2H), 2.56 (br t, *J* = 4.8 Hz, 2H), 2.53–2.51 (m, 2H);

**13C NMR** (126 MHz, DMSO-*d*6): *δ* 158.1, 145.5, 143.7, 142.4, 133.3, 128.3, 124.2, 123.3, 122.5, 120.2, 112.3, 107.8, 55.6, 52.9, 52.0, 46.1, 42.4;

**HRMS** (ESI+) *m*/*z*: [M+H]+ calculated for C17H17N4OBrS, 405.0379; found, 405.0381.


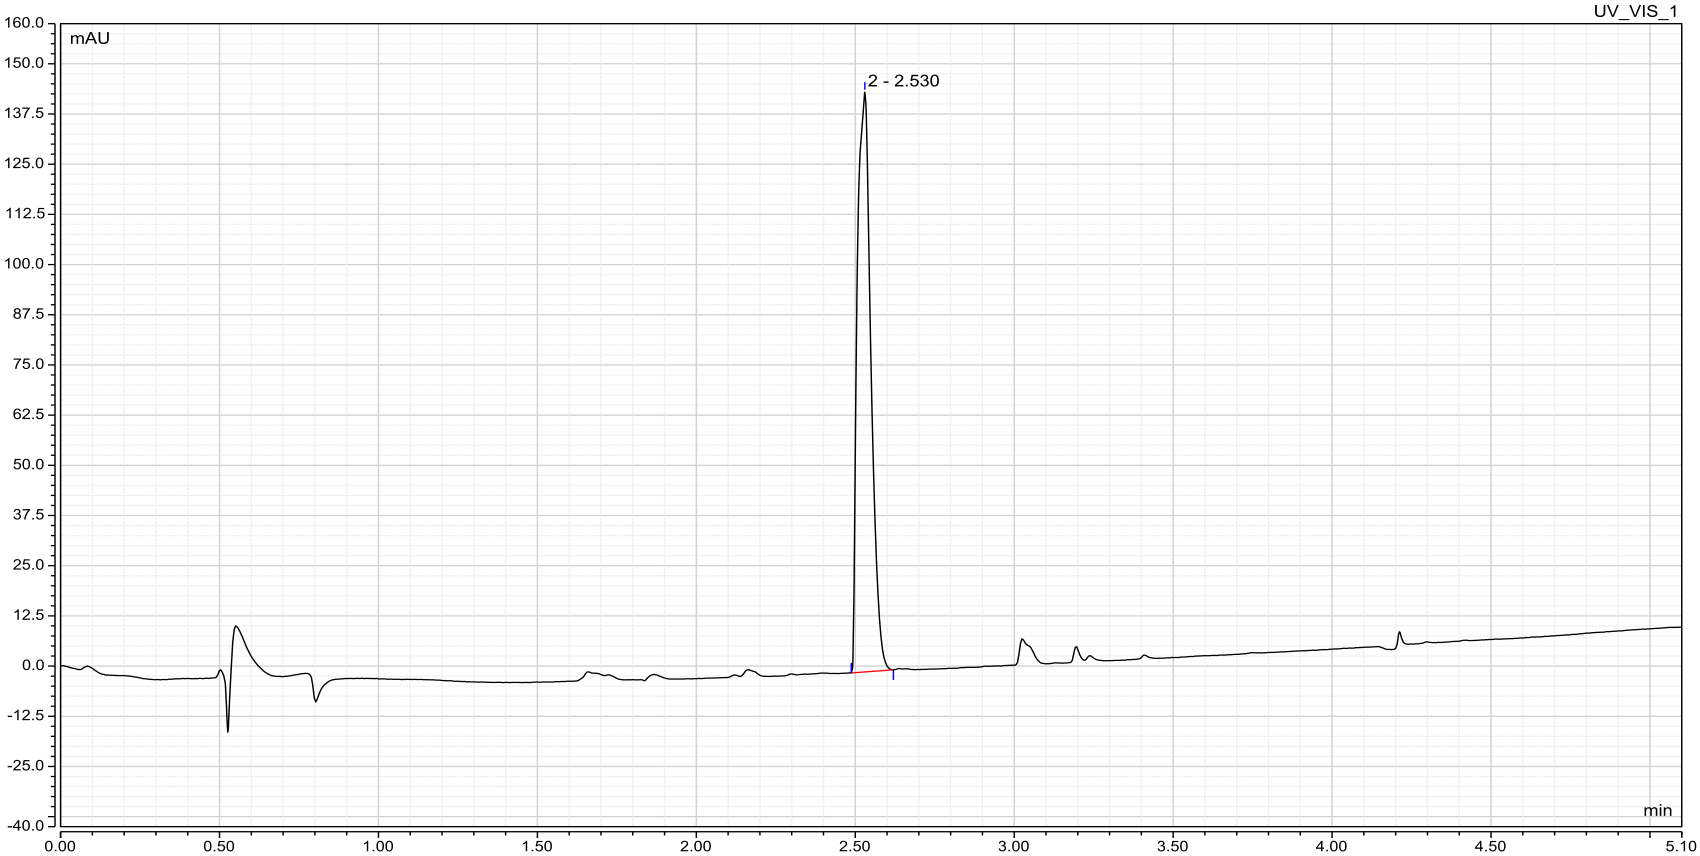


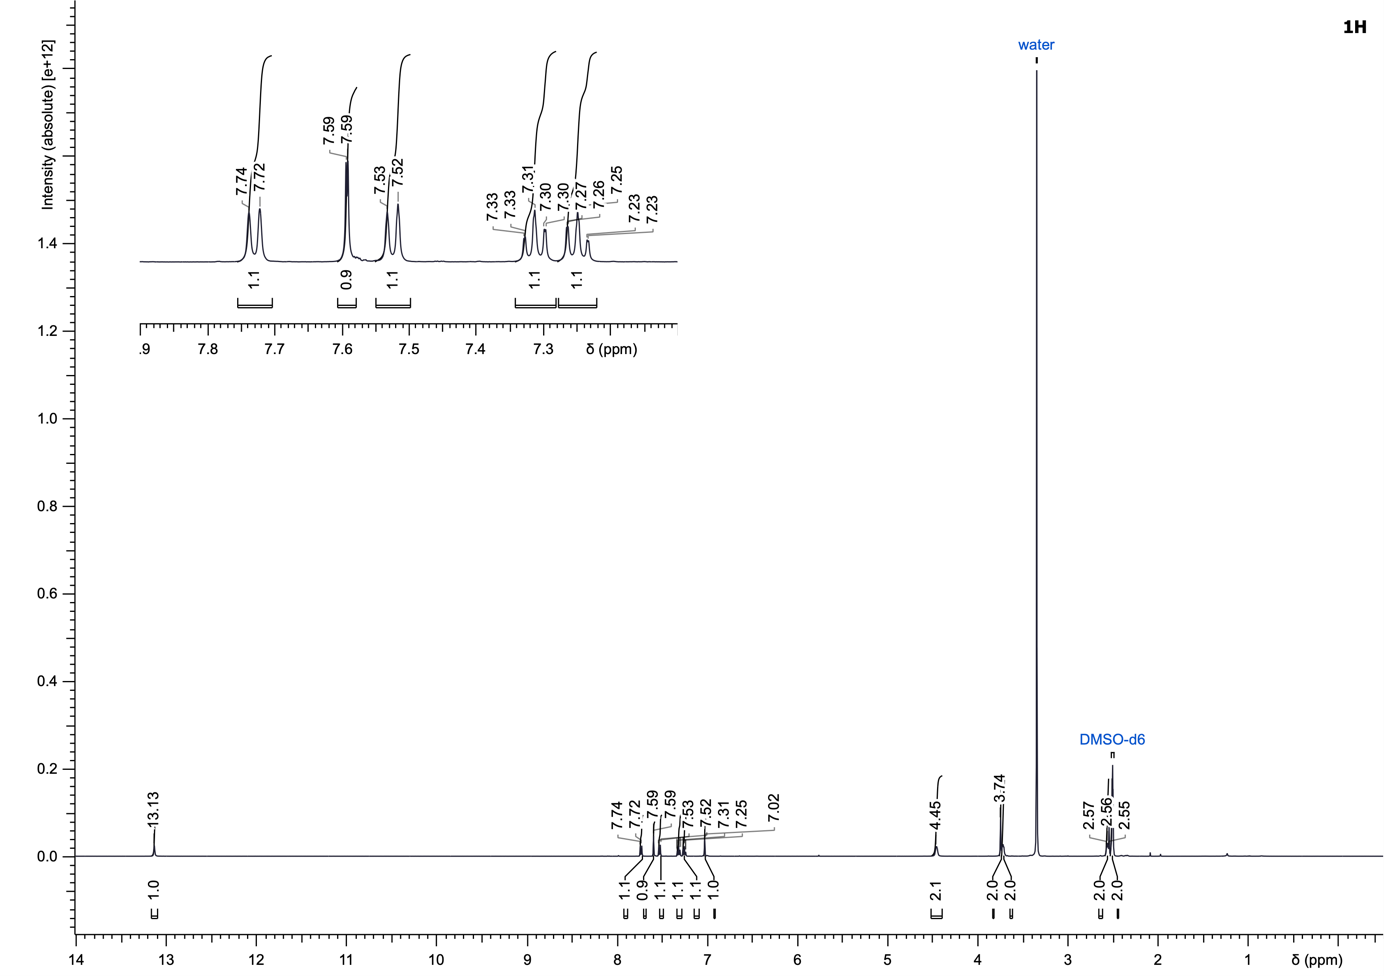


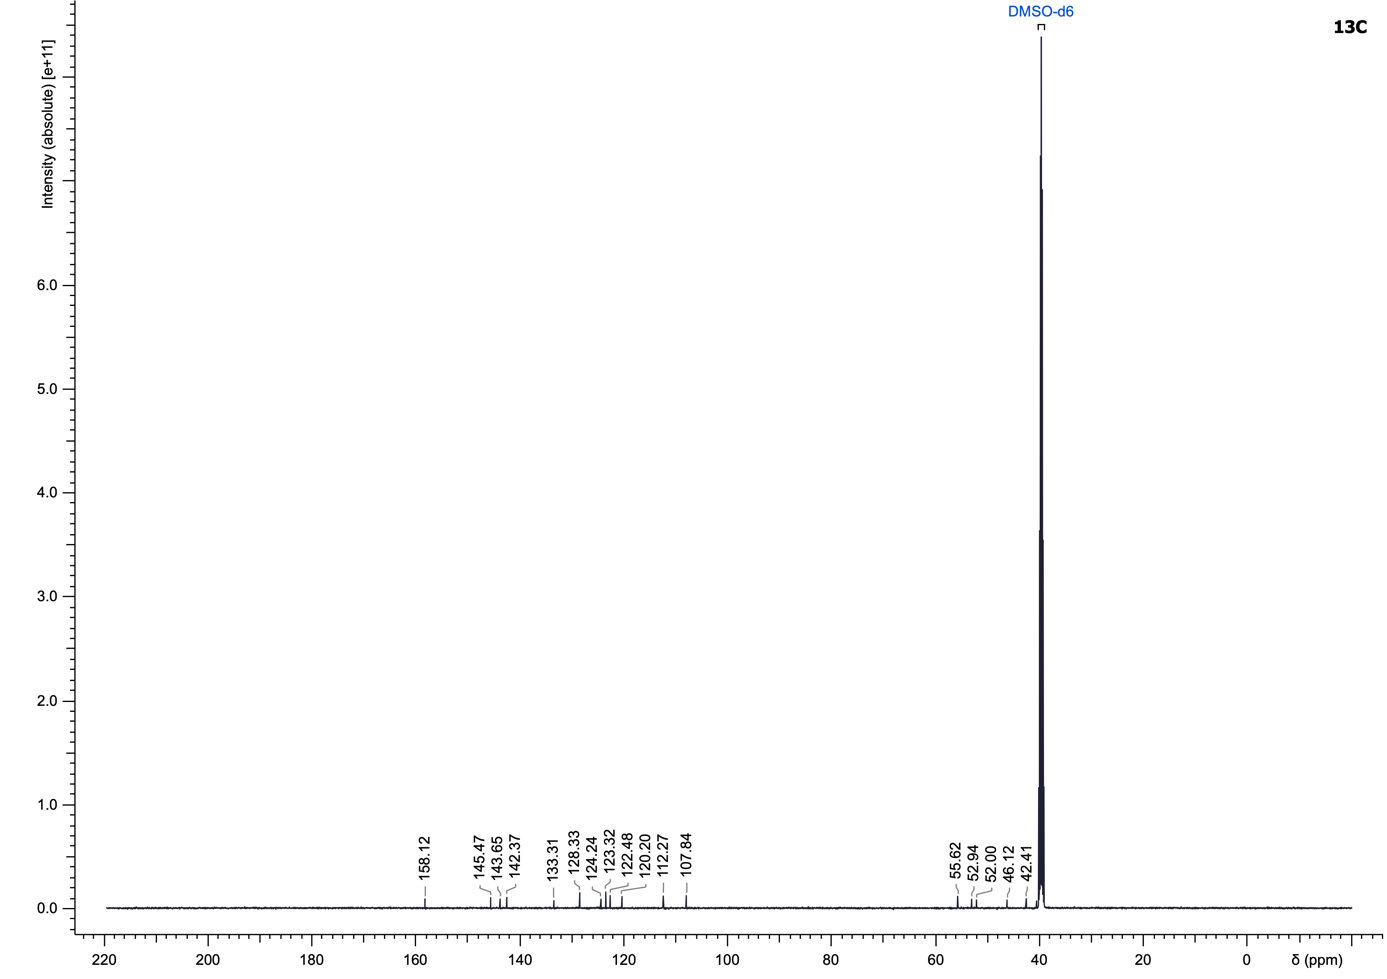


(4-((4-Bromothiophen-2-yl)methyl)piperazin-1-yl)(5-chlorobenzofuran-2-yl)methanone (19)

Compound **19** was synthesized according to the **General Procedure A** using 5-chlorobenzofuran-2-carboxylic acid and 1-((4-bromothiophen-2-yl)methyl)piperazine dihydrochloride (299.31 µmol) as starting materials and purified using cyclohexane/ethyl acetate (10 to 100% ethyl acetate) to yield a yellow solid (97.6 mg, 74%).

**LC–MS** (ESI): tR = 3.14 min; 96% purity (UV at 254 nm);

**1H NMR** (500 MHz, CDCl3): *δ* 7.62 (d, *J* = 2.0 Hz, 1H), 7.43 (d, *J* = 8.9 Hz, 1H), 7.35 (dd, *J* = 8.8, 2.1 Hz, 1H), 7.23 (s, 1H), 7.16 (s, 1H), 6.87 (s, 1H), 3.87 (br s, 4H), 3.74 (br s, 2H), 2.60 (br s, 4H);

**13C NMR** (126 MHz, CDCl3): *δ* 159.4, 153.1, 150.4, 129.4, 128.9, 128.4, 127.0, 122.8, 122.0, 121.9, 113.1, 111.6, 109.2, 56.7, 53.1, 52.7, 46.7, 42.9;

**HRMS** (ESI+) *m*/*z*: [M+H]+ calculated for C18H16N2O2BrClS, 438.9877; found, 438.9866.


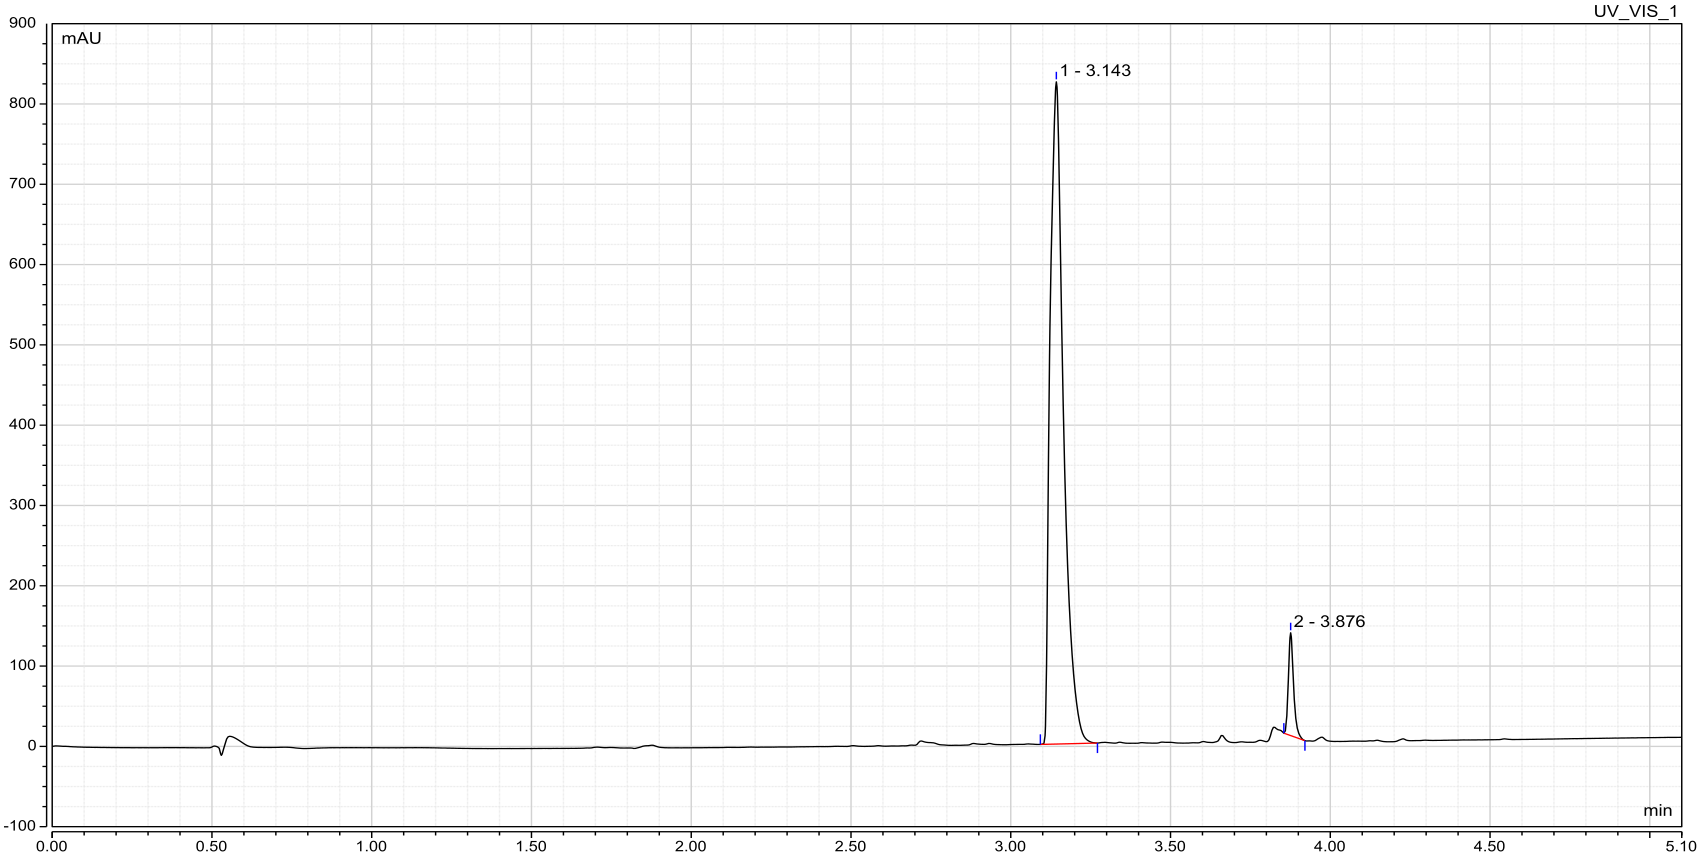


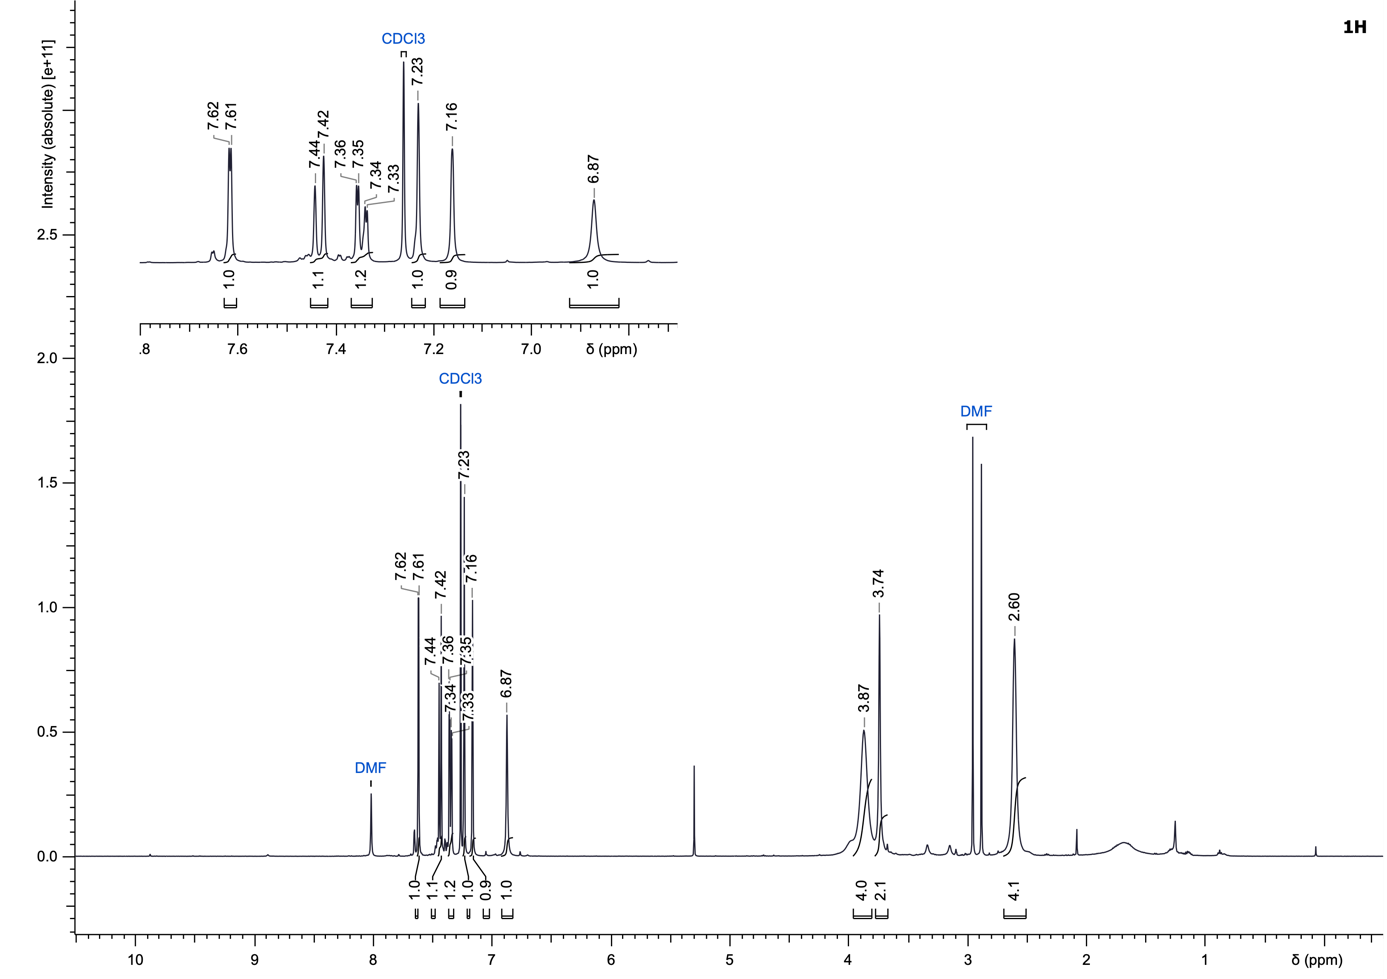


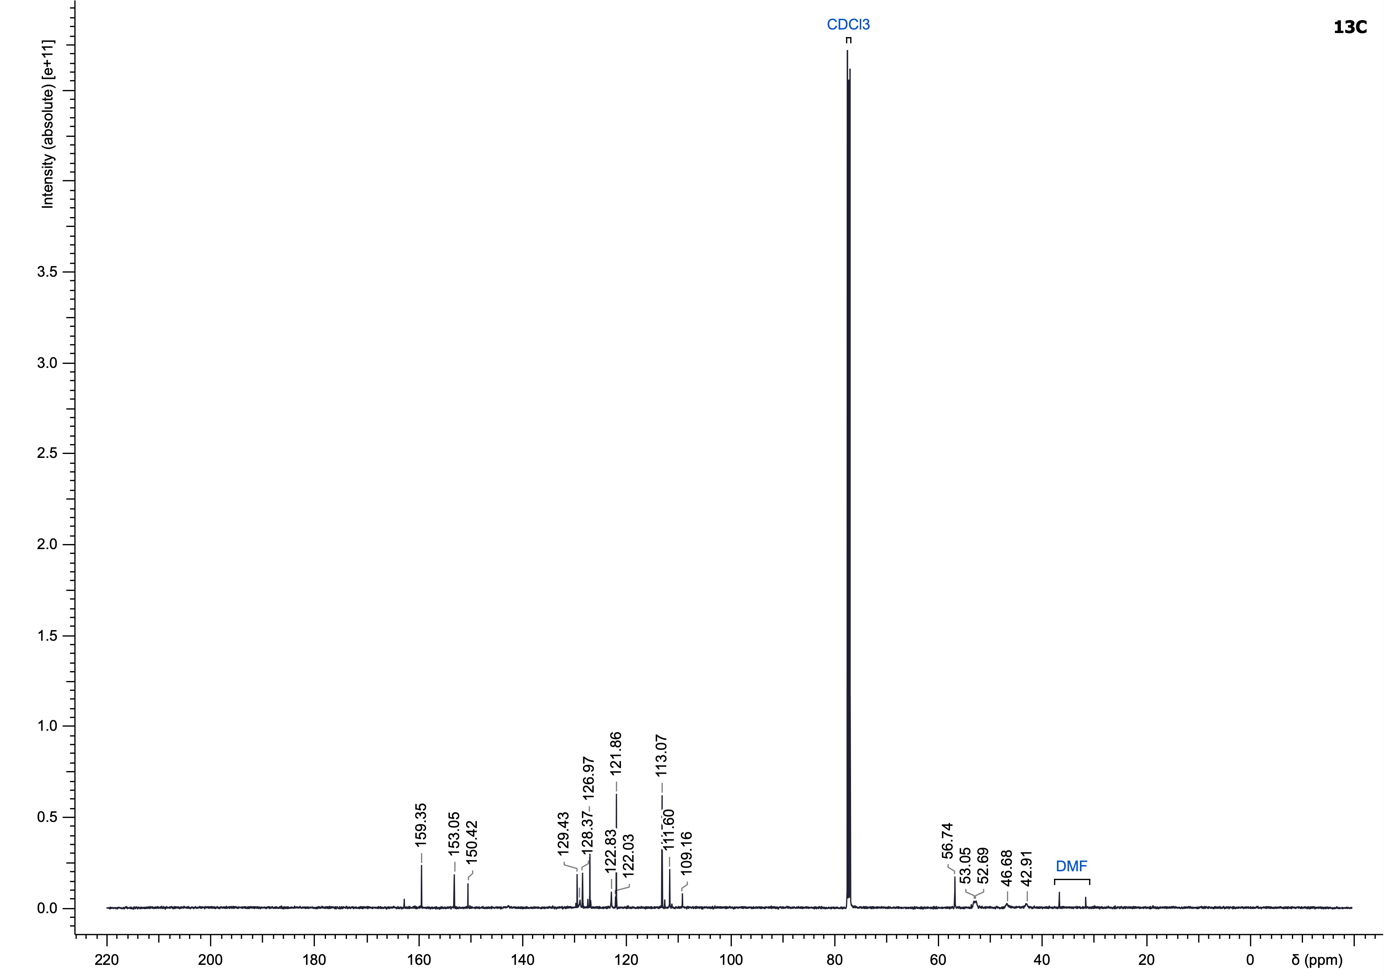


(4-((4-Bromothiophen-2-yl)methyl)piperazin-1-yl)(4,5,6,7-tetrahydrobenzo[*b*]thiophen-2-yl)methanone (20)

Compound **20** was synthesized according to the **General Procedure A** using 4,5,6,7-tetrahydrobenzo[*b*]thiophene-2-carboxylic acid and 1-((4-bromothiophen-2-yl)methyl)piperazine dihydrochloride (299.31 µmol) as starting materials and purified using cyclohexane/ethyl acetate (10 to 100% ethyl acetate) to yield a yellow solid (102.5 mg, 81%).

**LC–MS** (ESI): tR = 3.07 min; > 99% purity (UV at 254 nm);

**1H NMR** (500 MHz, CDCl3): *δ* 7.15 (s, 1H), 6.94 (s, 1H), 6.86 (br s, 1H), 3.78 (br s, 4H), 3.71 (br s, 2H), 2.75 (br t, *J* = 6.0 Hz, 2H), 2.58 (br t, *J* = 6.0 Hz, 2H), 2.53 (br s, 4H), 1.88–1.75 (m, 4H);

**13C NMR** (126 MHz, CDCl3): *δ* 164.1, 143.1, 140.0, 135.3, 132.7, 130.2, 128.8, 122.8, 109.1, 56.8, 52.9 (4C), 25.6, 25.1, 23.5, 22.8;

**HRMS** (ESI+) *m*/*z*: [M+H]+ calculated for C18H21N2OBrS2, 425.0351; found, 425.0344.


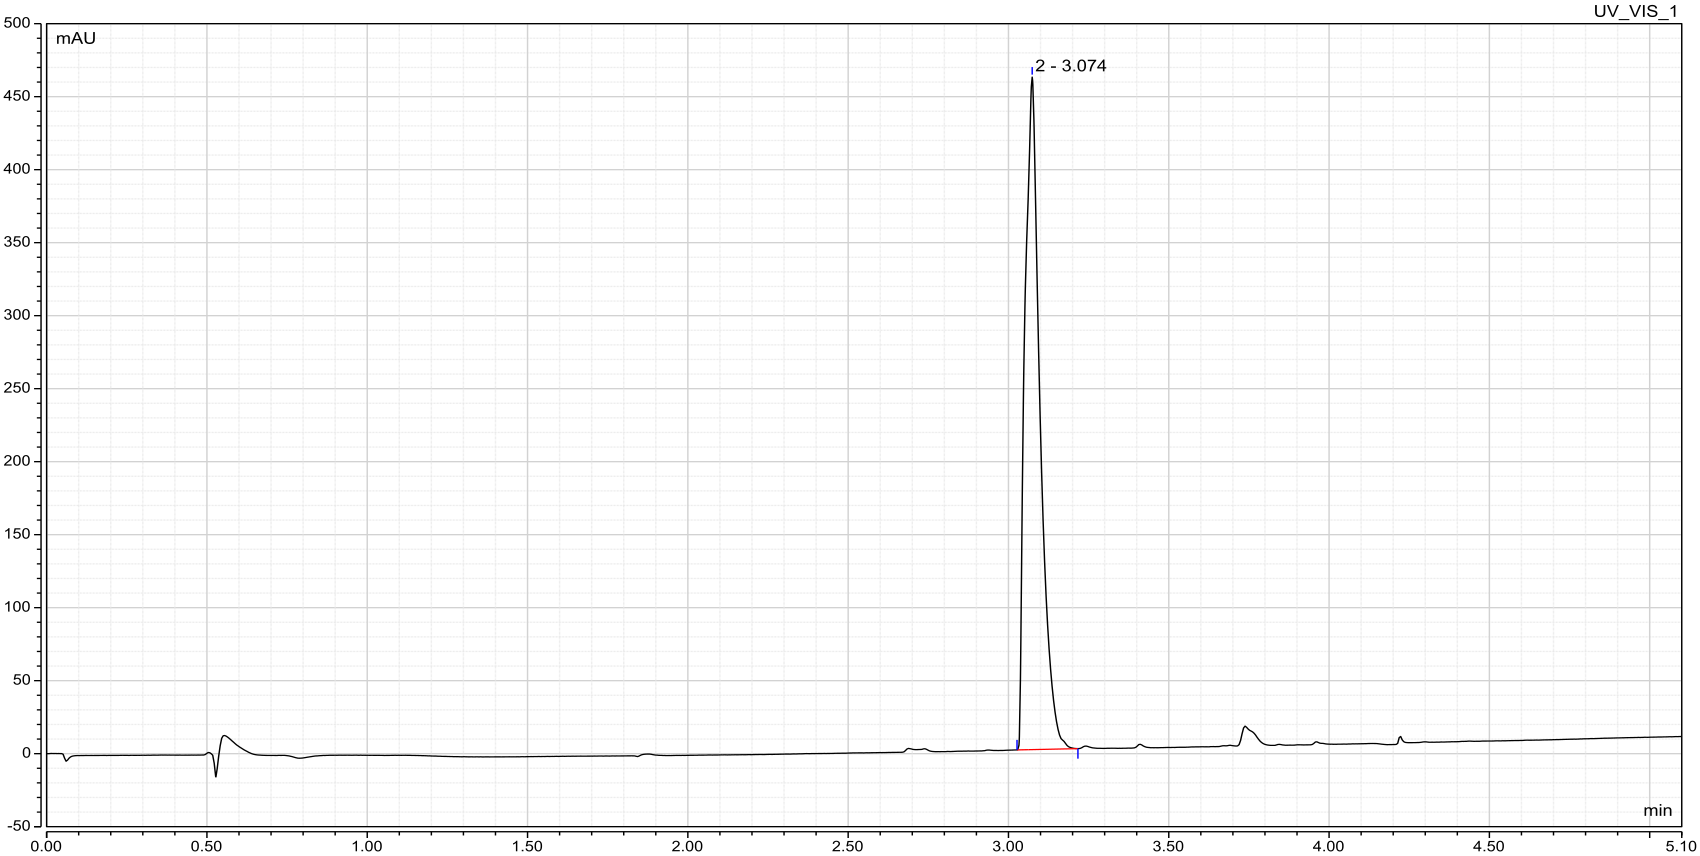


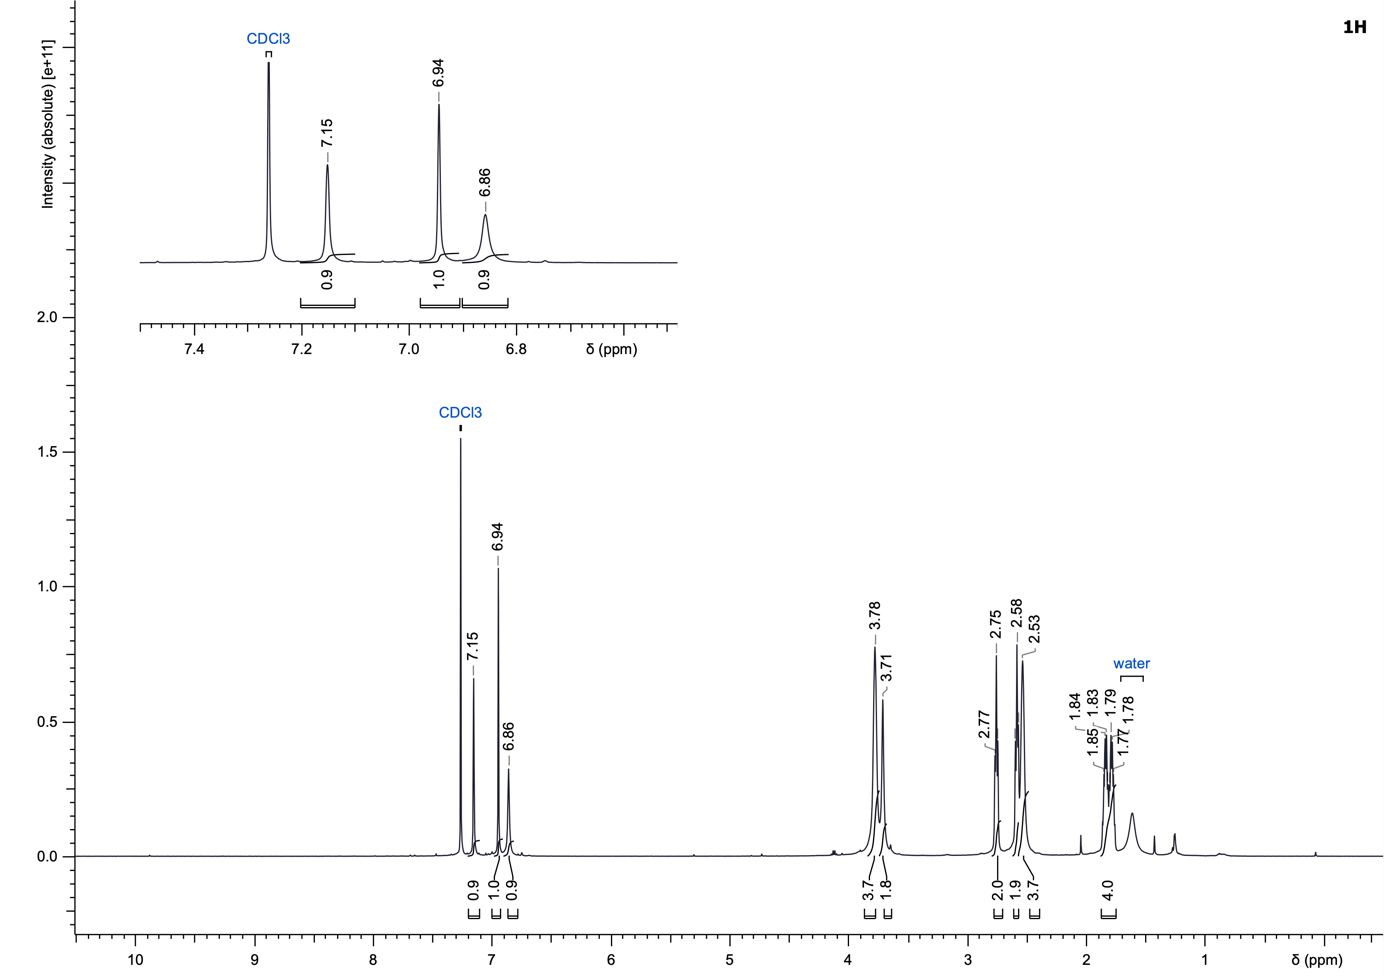


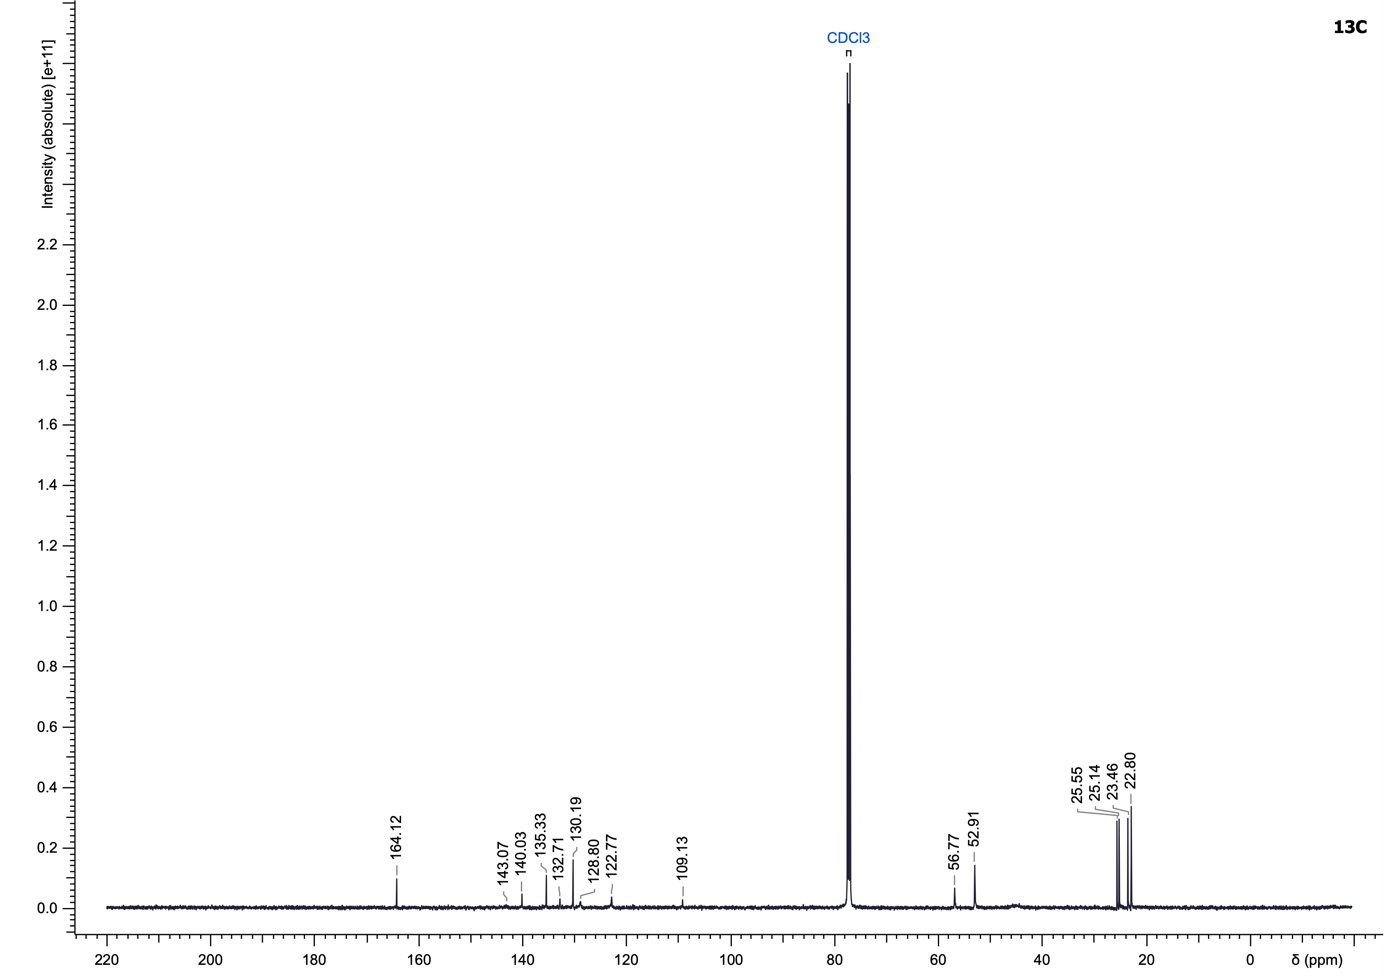


1-((4-(4-Isopropoxyphenyl)thiophen-2-yl)methyl)piperazine (21)

Compound **21** was synthesized according to the **General Procedure B** using 1-((4-bromothiophen-2-yl)methyl)piperazine dihydrochloride (149.66 µmol) and (4-isopropoxyphenyl)boronic acid as starting materials and purified using dichloromethane/methanol + 5% triethylamine (0.5 to 4% methanol) to yield a light green solid (39.9 mg, 84%).

**LC–MS** (ESI): tR = 2.68 min; > 99% purity (UV at 254 nm);

**1H NMR** (500 MHz, CDCl3): *δ* 7.46 (d, *J* = 8.4 Hz, 2H), 7.23 (s, 1H), 7.15 (s, 1H), 6.90 (d, *J* = 8.4 Hz, 2H), 4.56 (sept, *J* = 6.0 Hz, 1H), 3.91–3.71 (m, 3H), 3.01 (t, *J* = 4.7 Hz, 4H), 2.60 (br s, 4H), 1.35 (d, *J* = 6.0 Hz, 6H);

**13C NMR** (126 MHz, CDCl3): *δ* 157.3, 141.9, 141.5, 128.7, 127.5 (2C), 125.6, 118.7, 116.3 (2C), 70.1, 57.7, 52.66, 52.71, 45.4, 45.3, 22.2 (2C);

**HRMS** (ESI+) *m*/*z*: [M+H]+ calculated for C18H24N2OS, 317.1682; found, 317.1682.


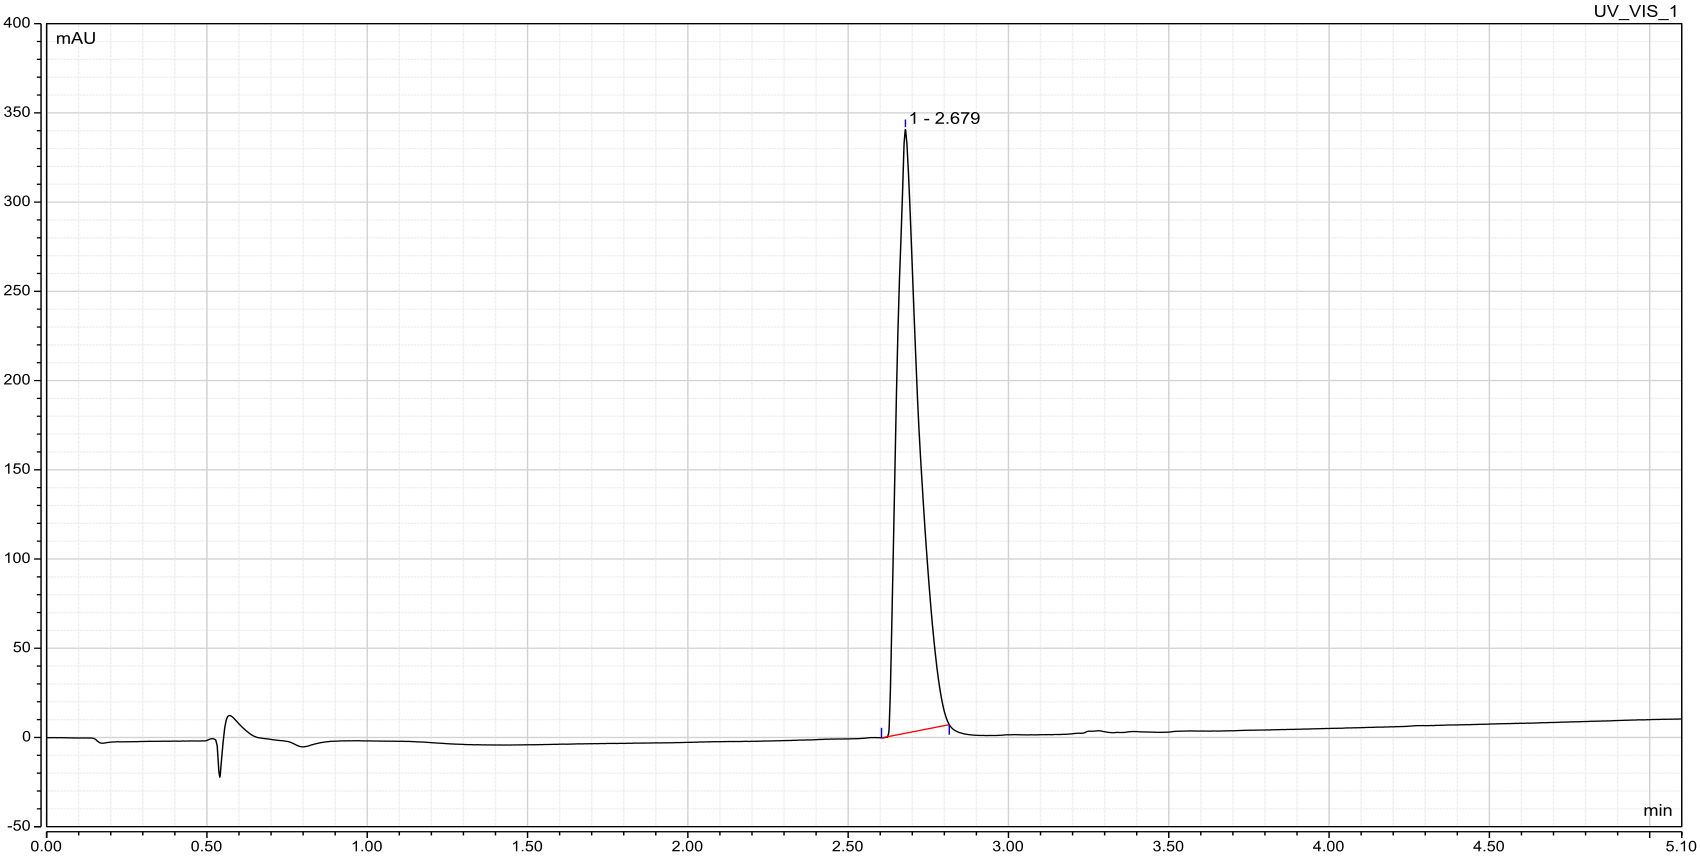


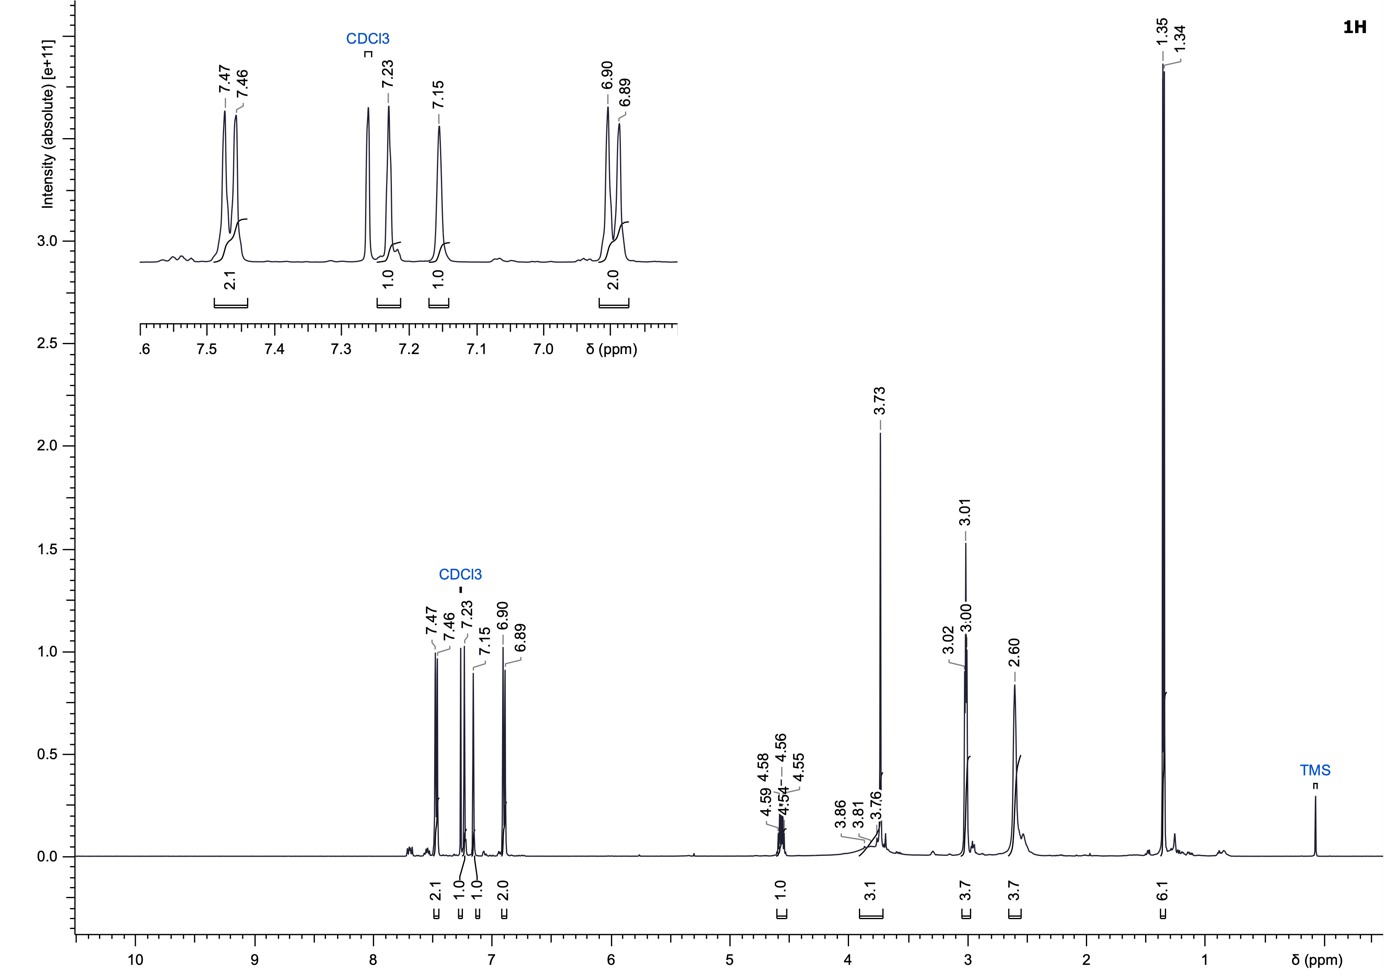


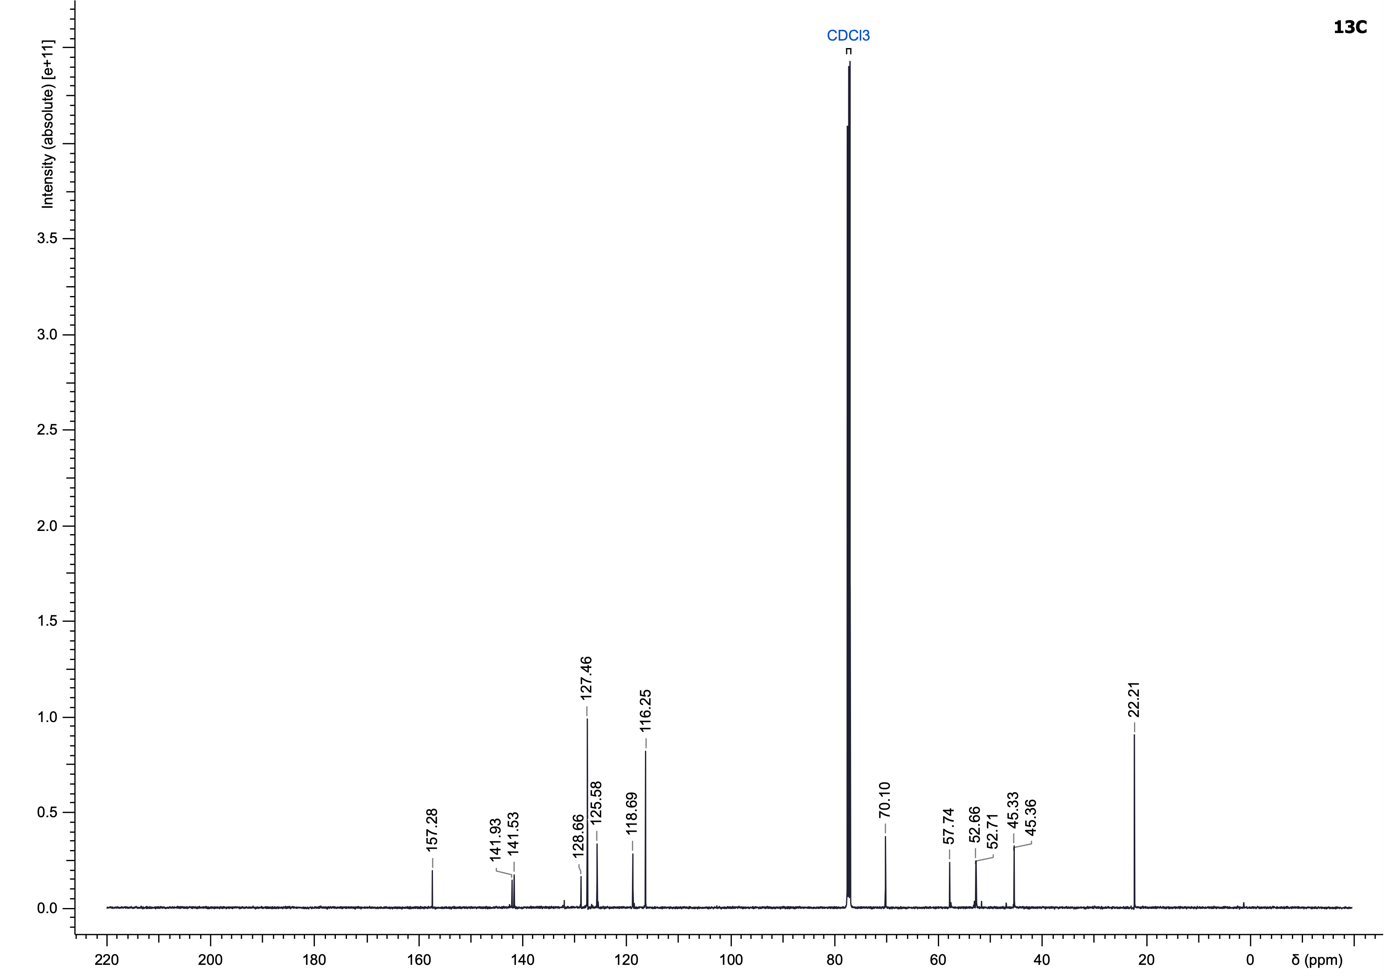


1-((4-(2-Ethoxyphenyl)thiophen-2-yl)methyl)piperazine (22)

Compound **22** was synthesized according to the **General Procedure B** using 1-((4-bromothiophen-2-yl)methyl)piperazine dihydrochloride (149.66 µmol) and (2-ethoxyphenyl)boronic acid as starting materials and purified using dichloromethane/methanol + 5% triethylamine (0.5 to 4% methanol) to yield a colourless solid (38.3 mg, 85%).

**LC–MS** (ESI): tR = 2.48 min; > 99% purity (UV at 254 nm);

**1H NMR** (500 MHz, CDCl3): *δ* 7.57 (s, 1H), 7.46 (d, *J* = 7.6 Hz, 1H), 7.28 (s, 1H), 7.23 (br t, *J* = 7.2 Hz, 1H), 6.99–6.91 (m, 2H), 6.39 (br s, 1H), 4.08 (q, *J* = 6.9 Hz, 2H), 3.75 (s, 2H), 3.11 (br s, 4H), 2.71 (br s, 4H), 1.44 (t, *J* = 6.9 Hz, 3H);

**13C NMR** (126 MHz, CDCl3): *δ* 55.9, 139.5, 137.9, 129.5, 128.3, 128.1, 125.0, 123.3, 120.8, 112.5, 64.0, 57.4, 51.2 (2C), 44.6 (2C), 15.0;

**HRMS** (ESI+) *m*/*z*: [M+H]+ calculated for C17H22N2OS, 303.1526; found, 303.1528.


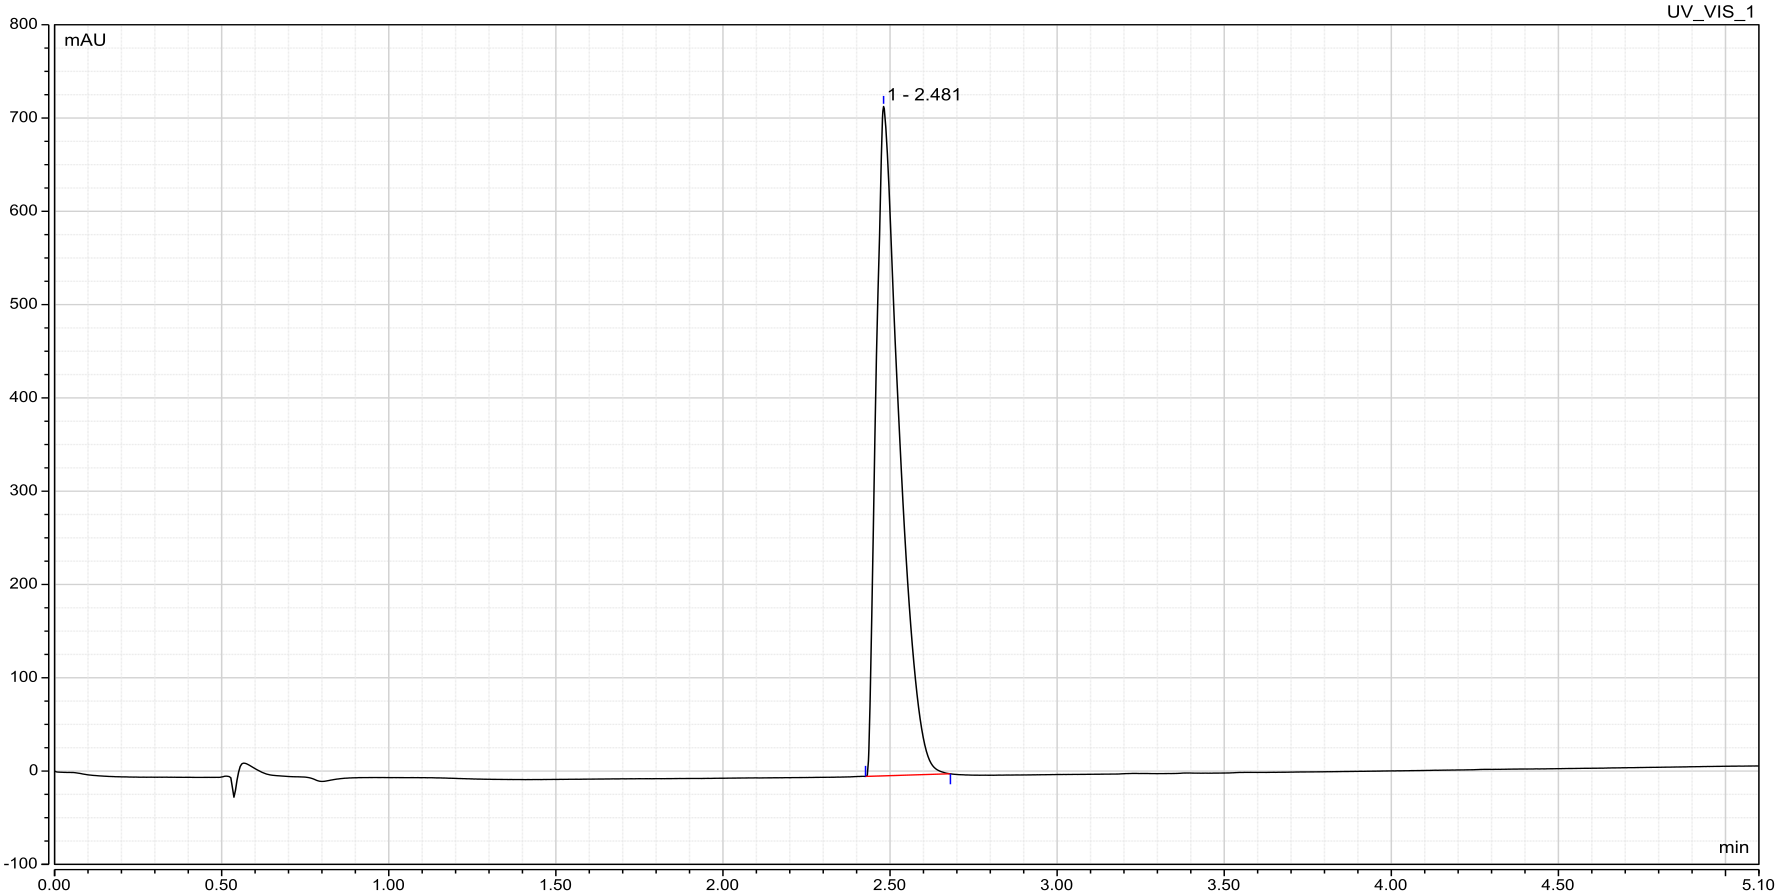


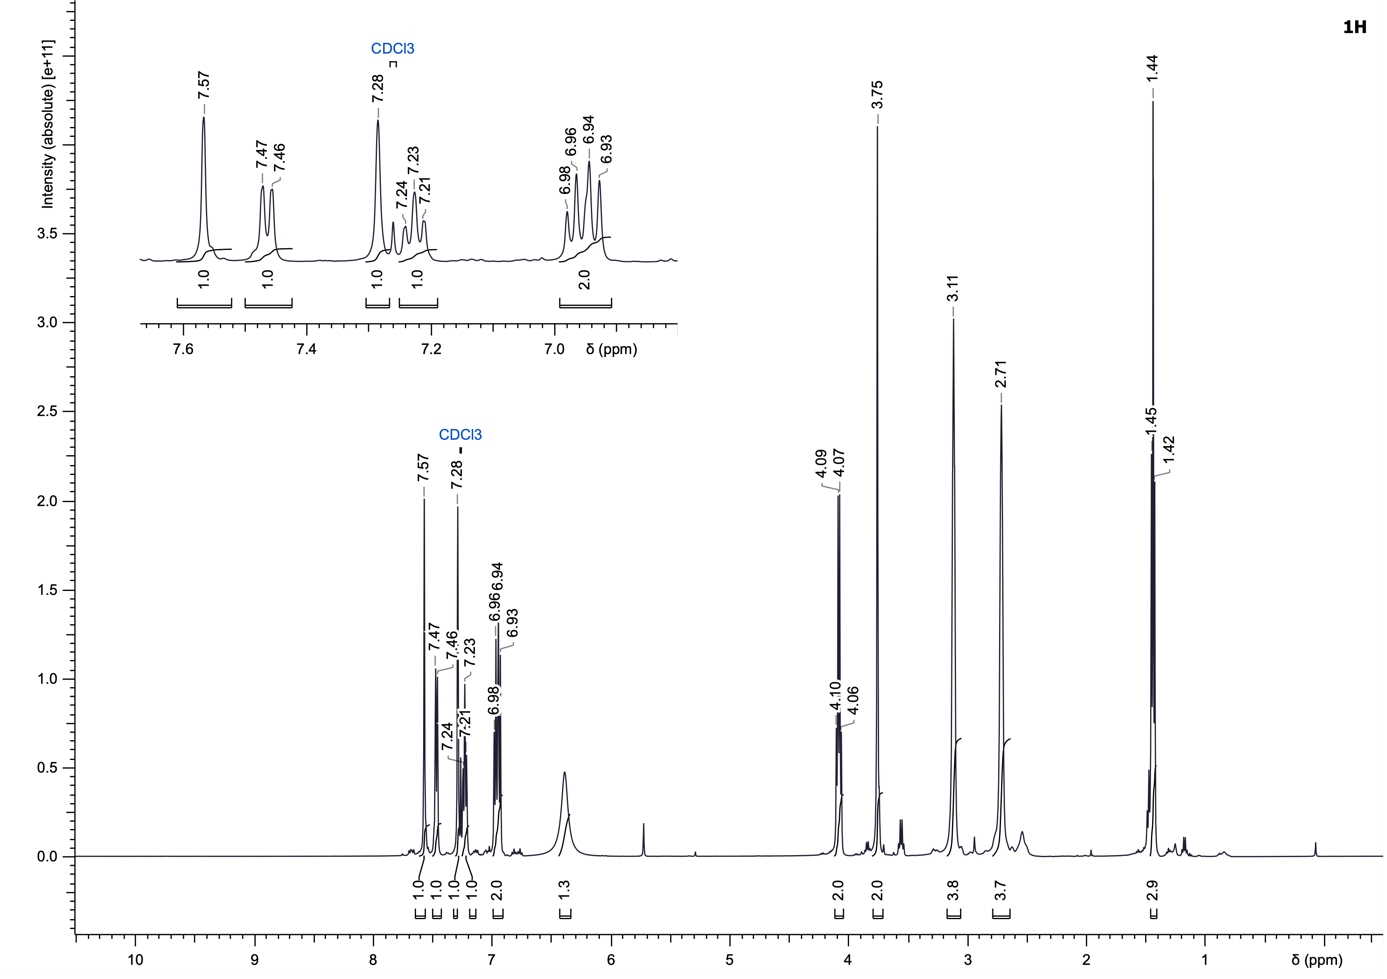


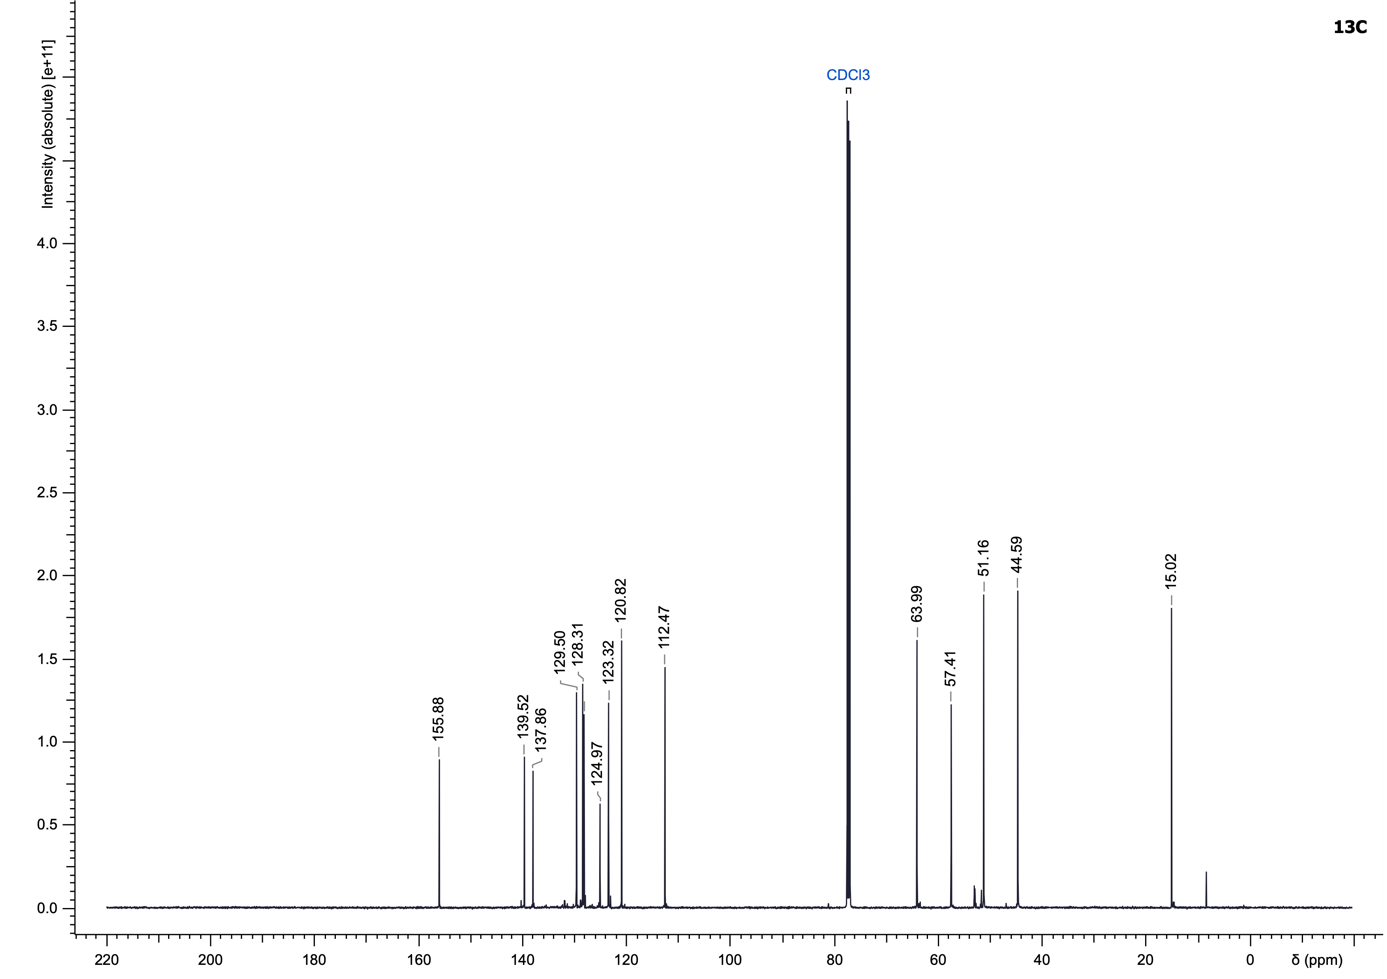


4-((4-(3-Ethoxyphenyl)thiophen-2-yl)methyl)piperazin-1-ium formate (23)

Compound **23** was synthesized according to the **General Procedure C** using 1-((4-bromothiophen-2-yl)methyl)piperazine dihydrochloride (897.94 µmol) and (3-ethoxyphenyl)boronic acid as starting materials. The reaction mixture was heated at 100 °C for 30 min and the compound was purified using water/acetonitrile + 1% formic acid (5 to 60% acetonitrile) to yield a dark orange oil (134.6 mg, 43%).

**LC–MS** (ESI): tR = 2.57 min; > 99% purity (UV at 254 nm);

**1H NMR** (500 MHz, DMSO-*d*6): *δ* 7.77 (s, 1H), 7.42 (s, 1H), 7.31–7.25 (m, 1H), 7.24–7.19 (m, 2H), 6.83 (dd, *J* = 8.0, 1.9 Hz, 1H), 6.36 (br s, 2H), 4.06 (q, *J* = 6.9 Hz, 2H), 3.72 (s, 2H), 2.95 (br s, 4H), 2.66–2.49 (m, 4H), 1.33 (t, *J* = 7.0 Hz, 3H);

**13C NMR** (126 MHz, DMSO-*d*6): *δ* 159.5, 142.3, 141.0, 137.0, 130.4, 126.0, 121.4, 118.6, 113.5, 112.4, 63.5, 56.8, 50.7 (2C), 43.7 (2C), 15.2;

**HRMS** (ESI+) *m*/*z*: [M+H]+ calculated for C17H22N2OS, 303.1526; found, 303.1524.


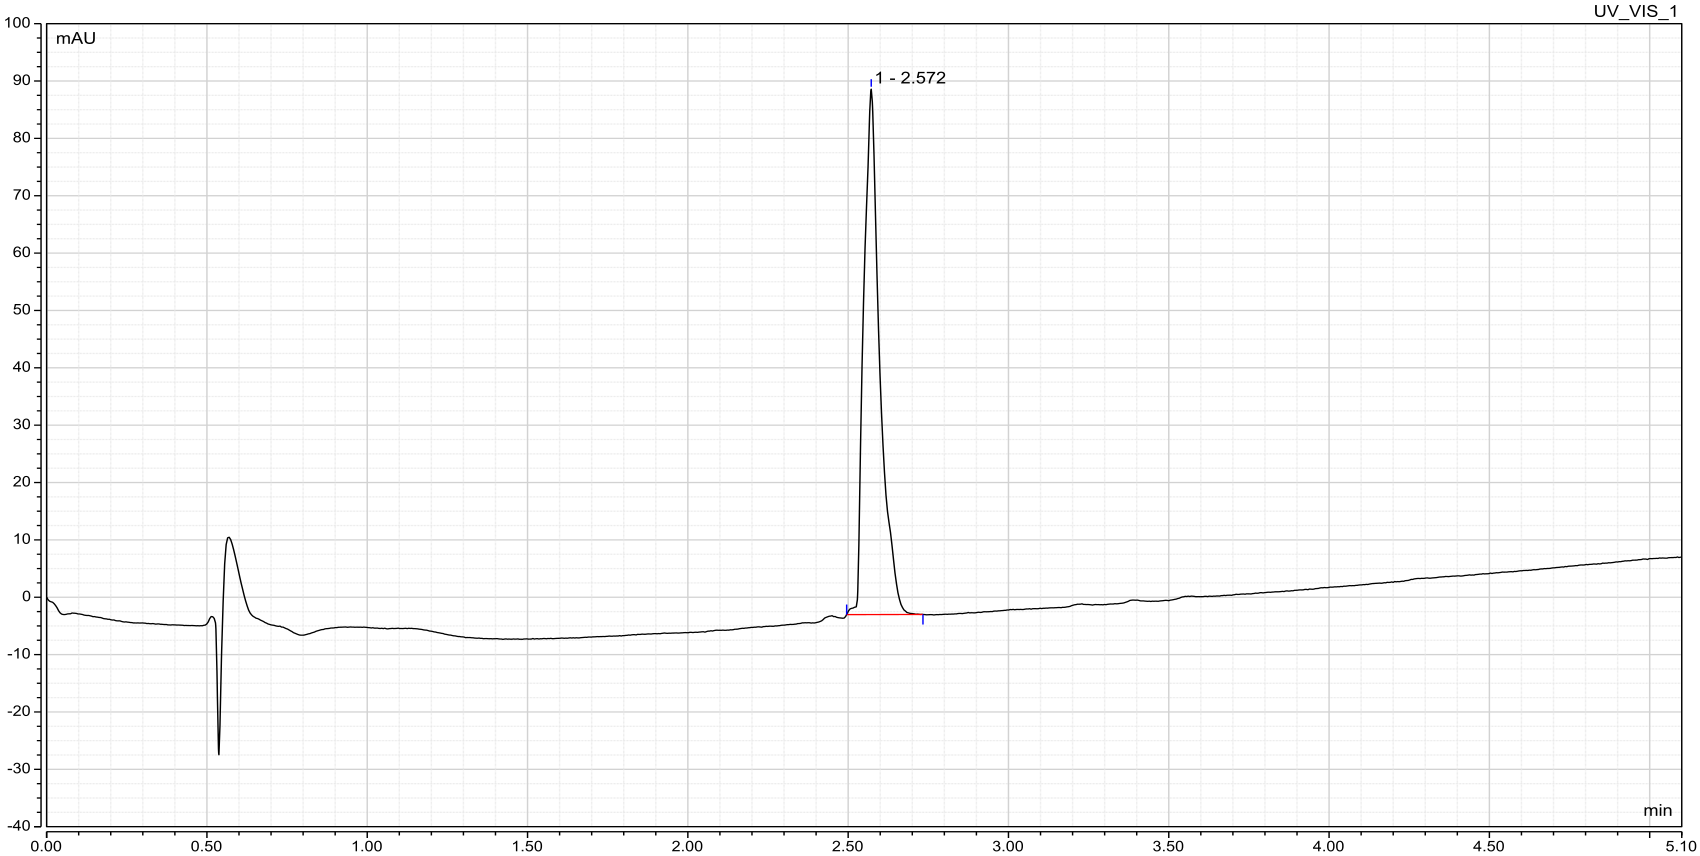


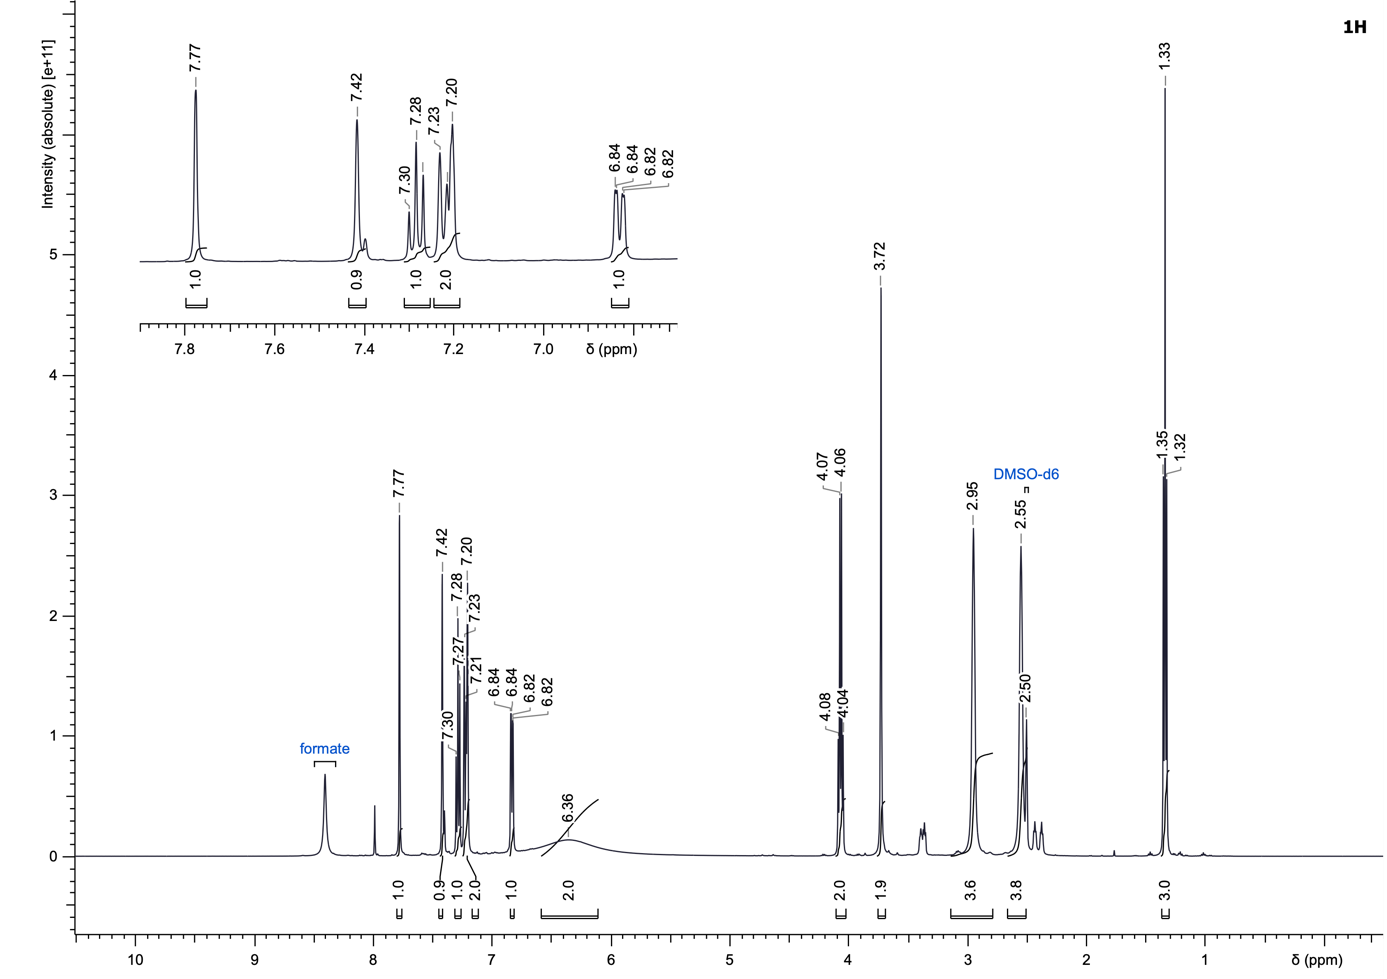


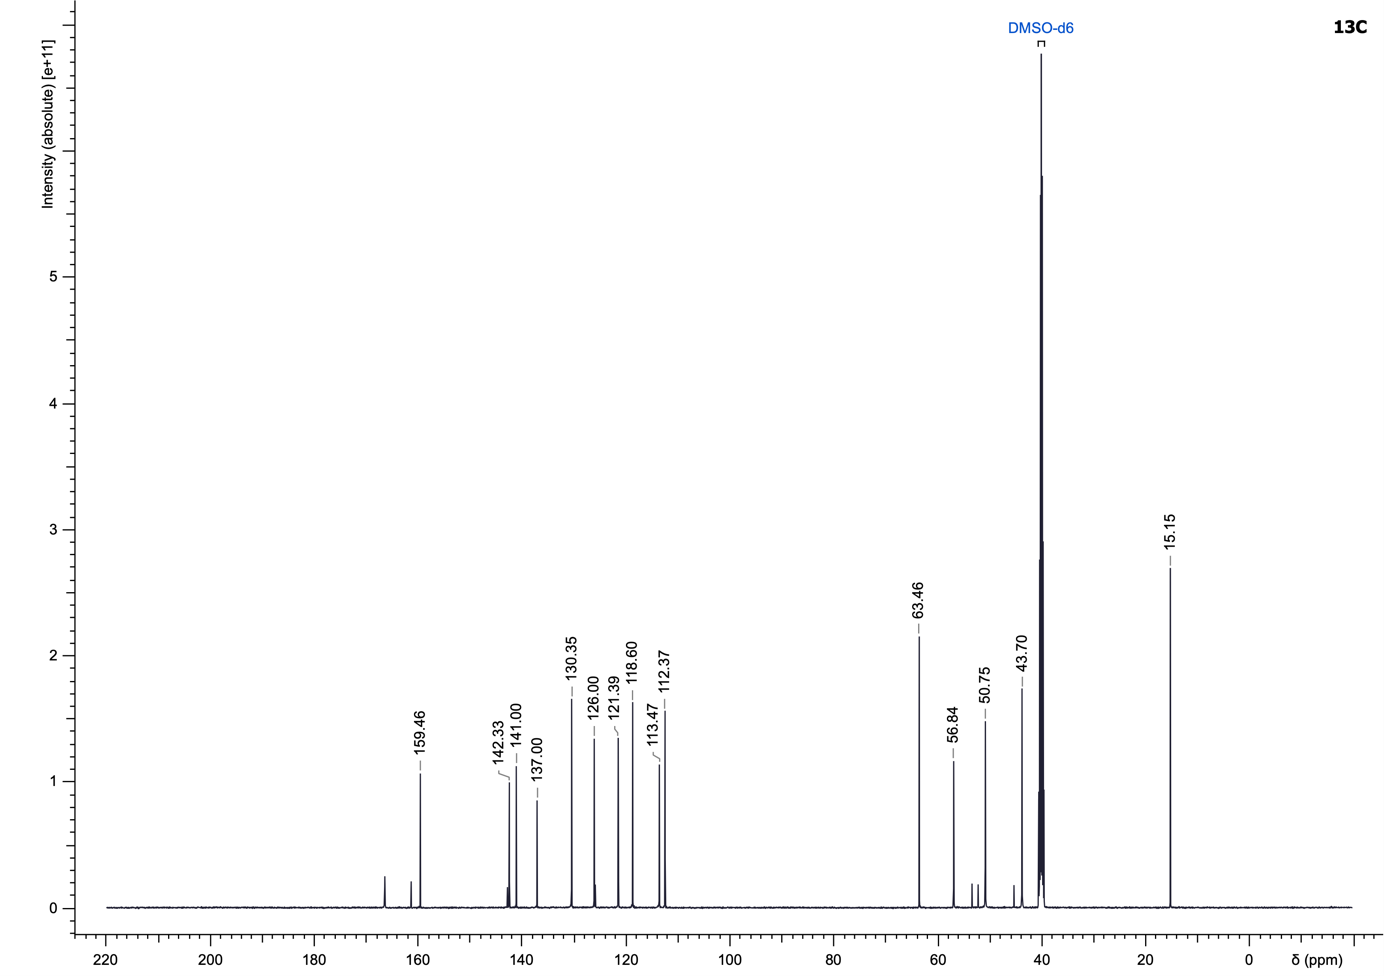


4-((4-(4-Ethoxyphenyl)thiophen-2-yl)methyl)piperazin-1-ium formate (24)

Compound **24** was synthesized according to the **General Procedure C** using 1-((4-bromothiophen-2-yl)methyl)piperazine dihydrochloride (897.94 µmol) and (4-ethoxyphenyl)boronic acid as starting materials. The reaction mixture was heated at 80 °C for 90 min and the compound was purified using water/acetonitrile + 1% formic acid (5 to 35% acetonitrile) to yield an off-white solid (157.1 mg, 50%).

**LC–MS** (ESI): tR = 2.51 min; > 99% purity (UV at 254 nm);

**1H NMR** (500 MHz, DMSO-*d*6): *δ* 7.60 (s, 1H), 7.58 (d, *J* = 8.7 Hz, 2H), 7.34 (s, 1H), 6.93 (d, *J* = 8.5 Hz, 2H), 5.24–4.64 (m, 2H), 4.04 (q, *J* = 6.9 Hz, 2H), 3.70 (s, 2H), 2.89 (br s, 4H), 2.51–2.49 (m, 4H), 1.33 (t, *J* = 6.9 Hz, 3H);

**13C NMR** (126 MHz, DMSO-*d*6): *δ* 157.7, 141.9, 140.4, 127.8, 127.0 (2C), 125.2, 118.8, 114.6 (2C), 63.0, 56.6, 51.0 (2C), 43.8 (2C), 14.7;

**HRMS** (ESI+) *m*/*z*: [M+H]+ calculated for C17H22N2OS, 303.1526; found, 303.1529.


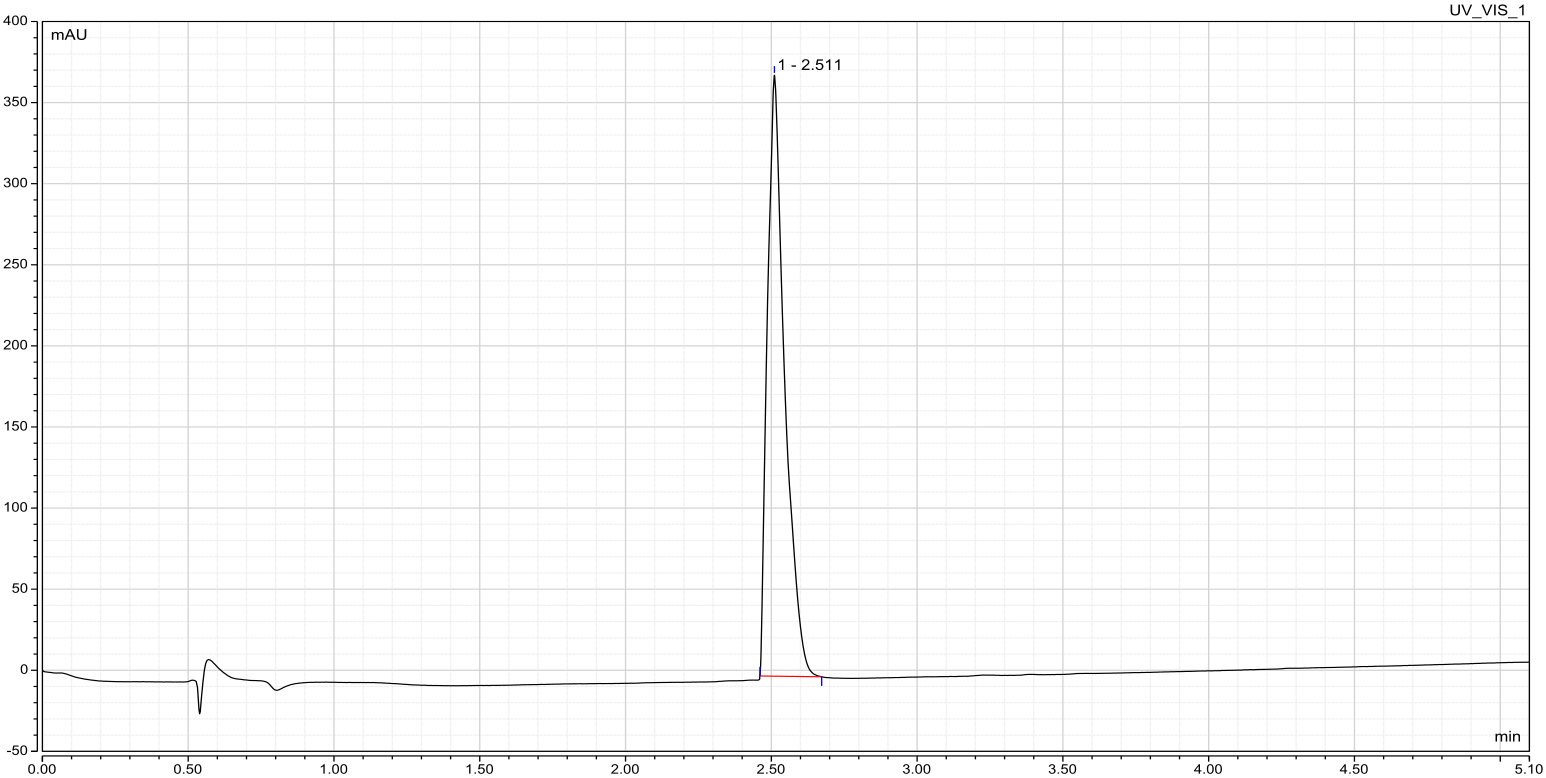


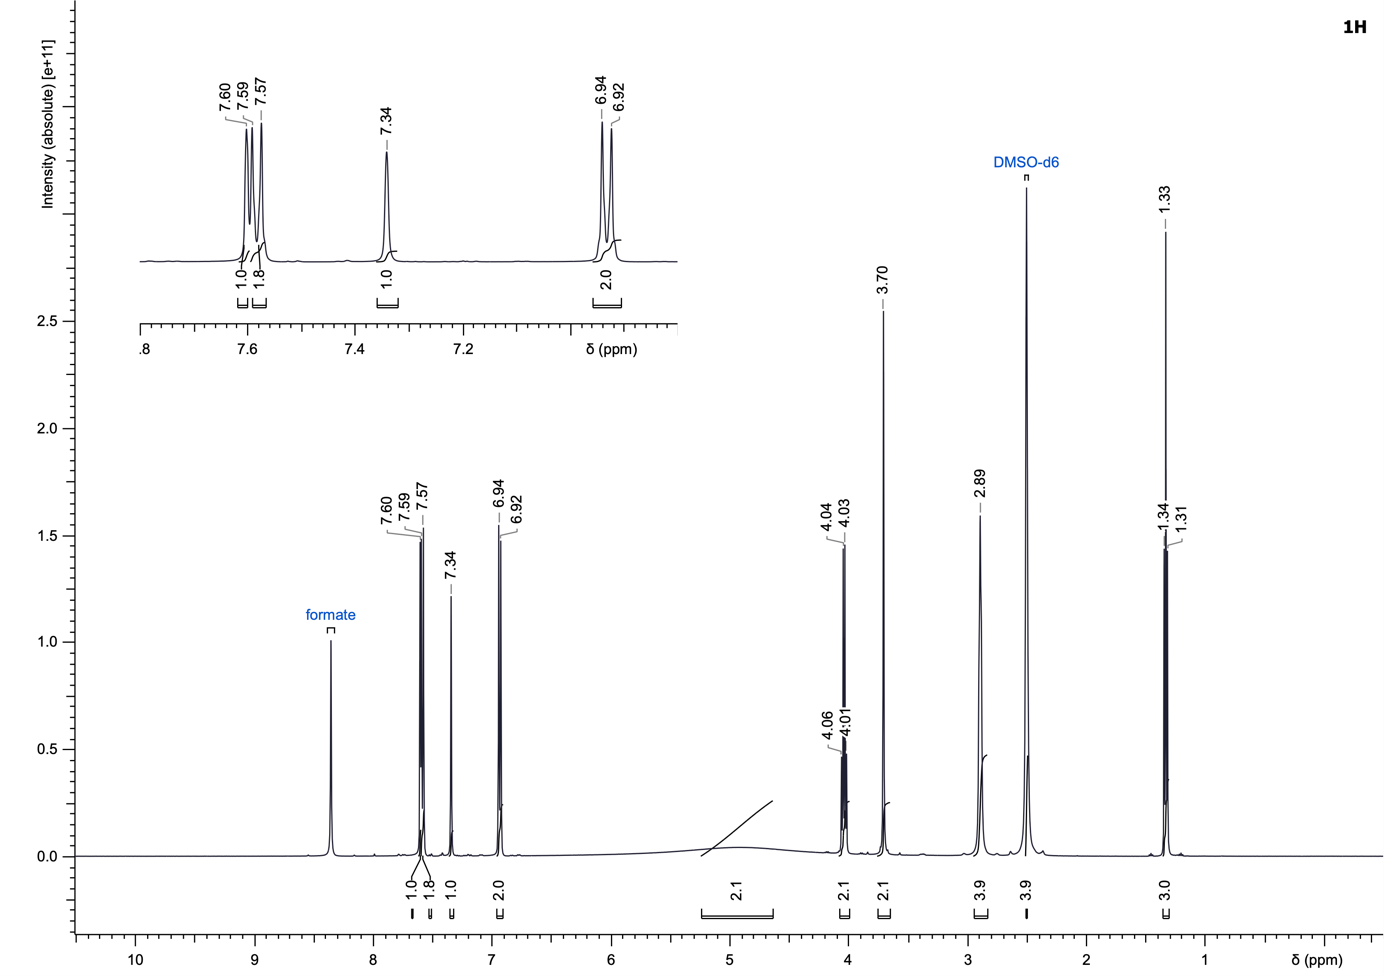


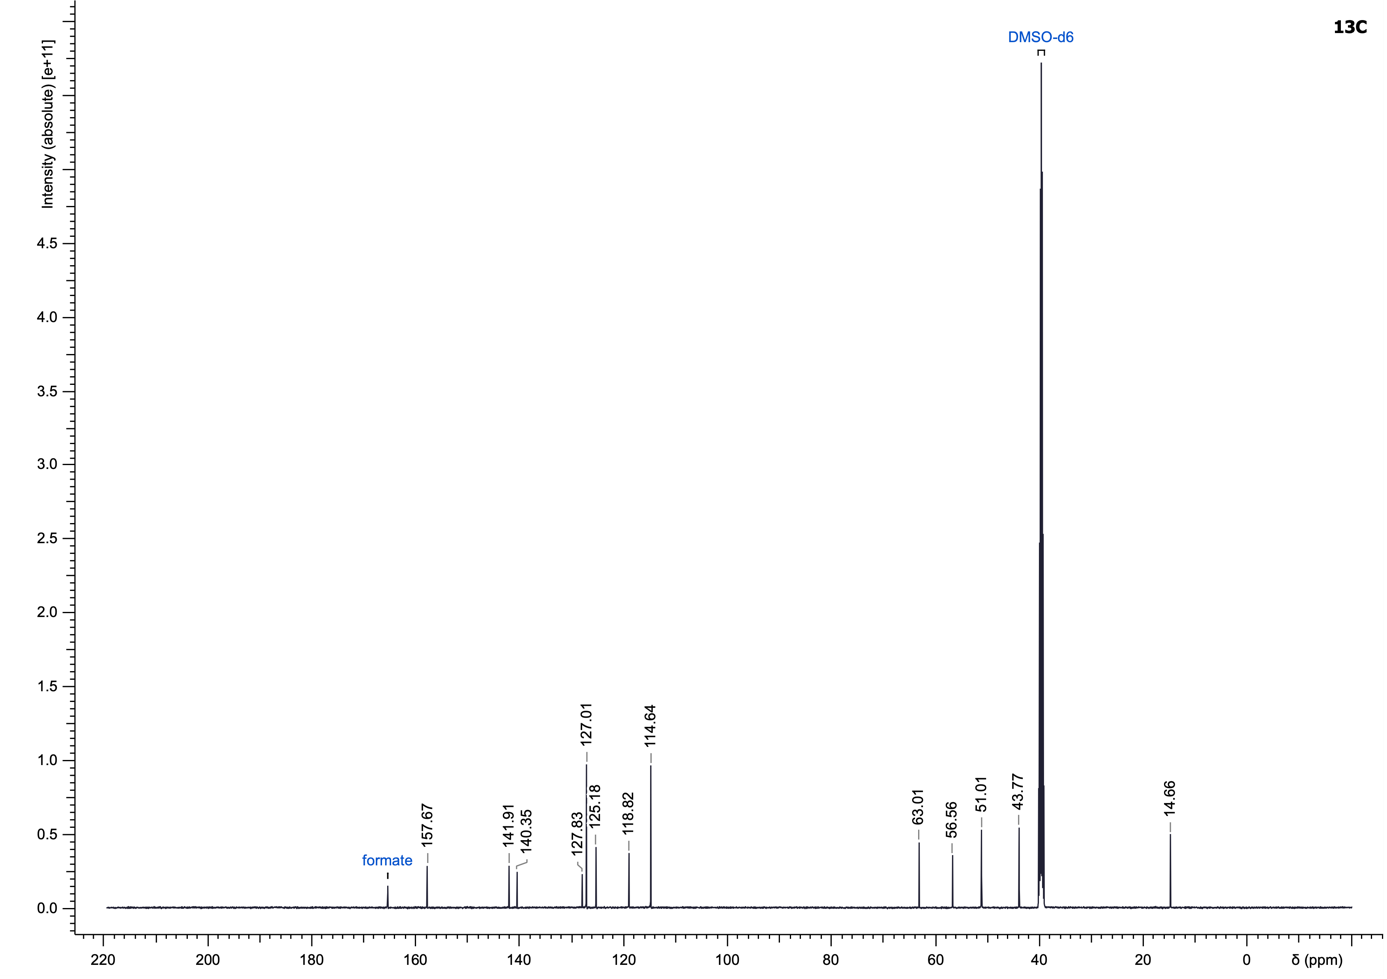


4-((4-(2-Isopropoxyphenyl)thiophen-2-yl)methyl)piperazin-1-ium formate (25)

Compound **25** was synthesized according to the **General Procedure C** using 1-((4-bromothiophen-2-yl)methyl)piperazine dihydrochloride (897.94 µmol) and (2-isopropoxyphenyl)boronic acid as starting materials. The reaction mixture was heated at 80 °C for 90 min. Then (2-isopropoxyphenyl)boronic acid (1.0 eq) was added, the vial was sealed, evacuated and backfilled with N2 (three times) and the resulting mixture was further degassed by sparging with N2 for 30 min, after which the vial was resealed and heated at 80 °C for 60 min. This sequence of boronic acid addition and heating was repeated twice. The compound was purified using water/acetonitrile + 1% formic acid (5 to 45% acetonitrile) to yield a dark orange solid (207.3 mg, 64%).

**LC–MS** (ESI): tR = 2.69 min; > 99% purity (UV at 254 nm);

**1H NMR** (500 MHz, DMSO-*d*6): *δ* 7.68 (s, 1H), 7.50 (br d, *J* = 7.5 Hz, 1H), 7.36 (s, 1H), 7.23 (t, *J* = 7.8 Hz, 1H), 7.06 (d, *J* = 8.2 Hz, 1H), 6.94 (t, *J* = 7.4 Hz, 1H), 6.01 (br s, 2H), 4.63 (sept, *J* = 5.9 Hz, 1H), 3.72 (s, 2H), 2.93 (br s, 4H), 2.61–2.50 (m, 4H), 1.27 (d, *J* = 6.0 Hz, 6H);

**13C NMR** (126 MHz, DMSO-*d*6): *δ* 154.2, 139.5, 137.4, 129.4, 128.2, 127.8, 125.1, 122.9, 120.6, 114.3, 69.7, 56.4, 50.4 (2C), 43.4 (2C), 21.8 (2C);

**HRMS** (ESI+) *m*/*z*: [M+H]+ calculated for C18H24N2OS, 317.1682; found, 317.1682.


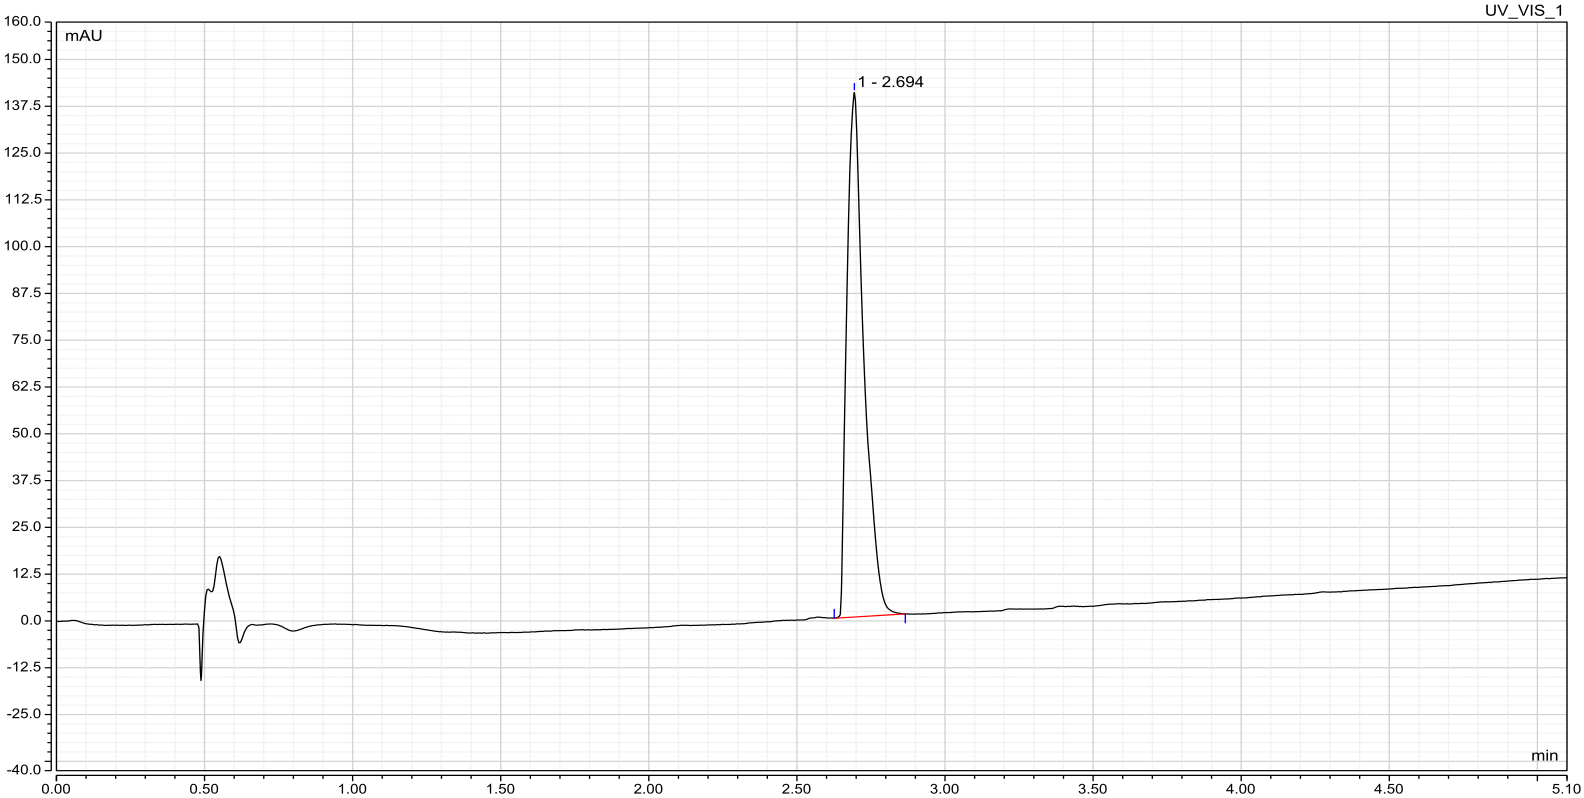


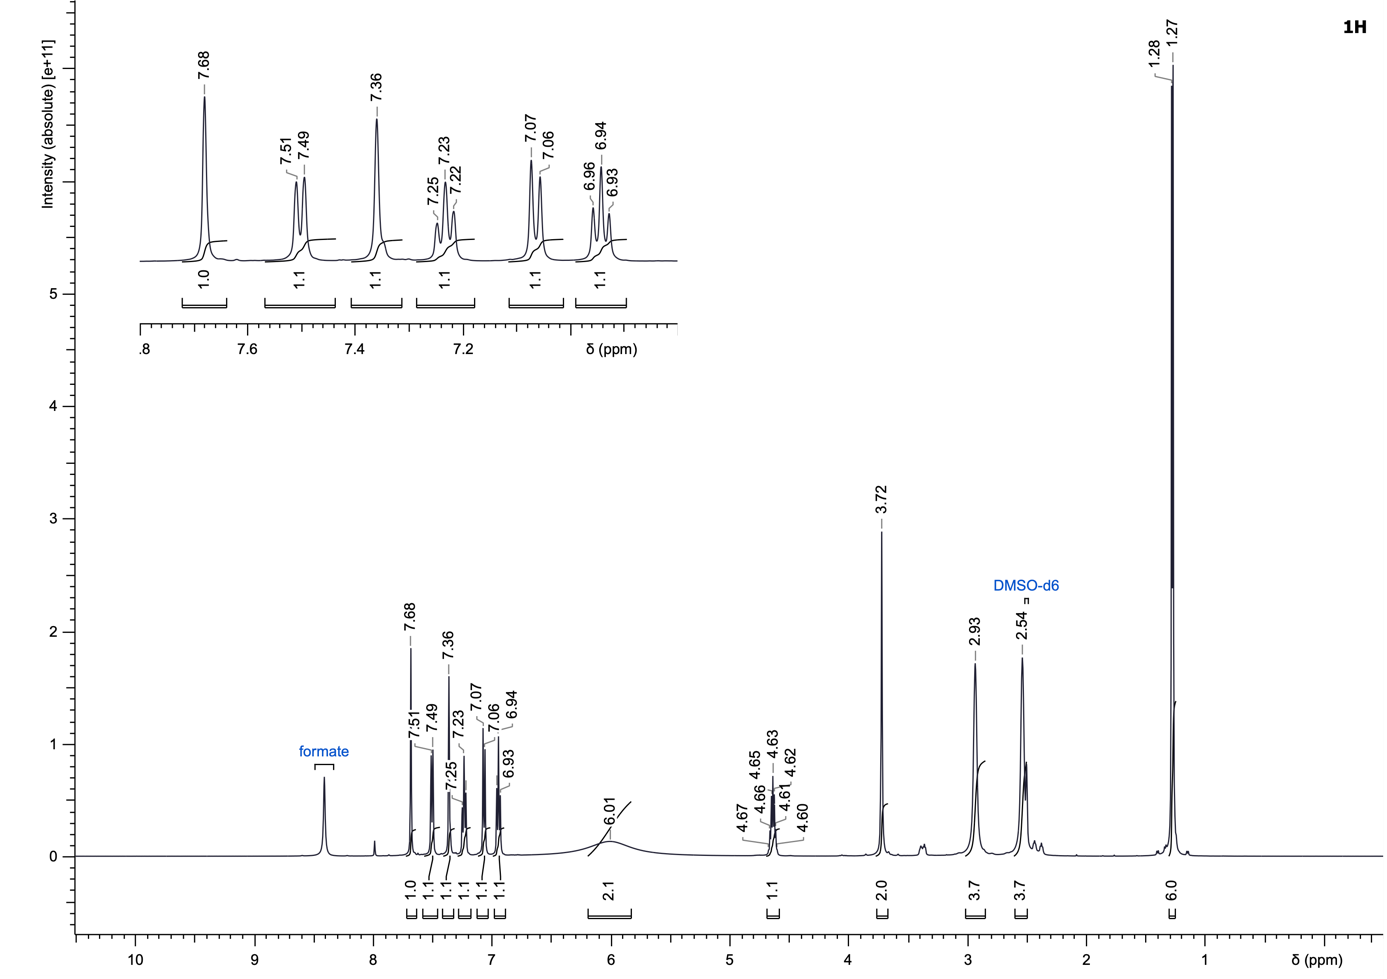


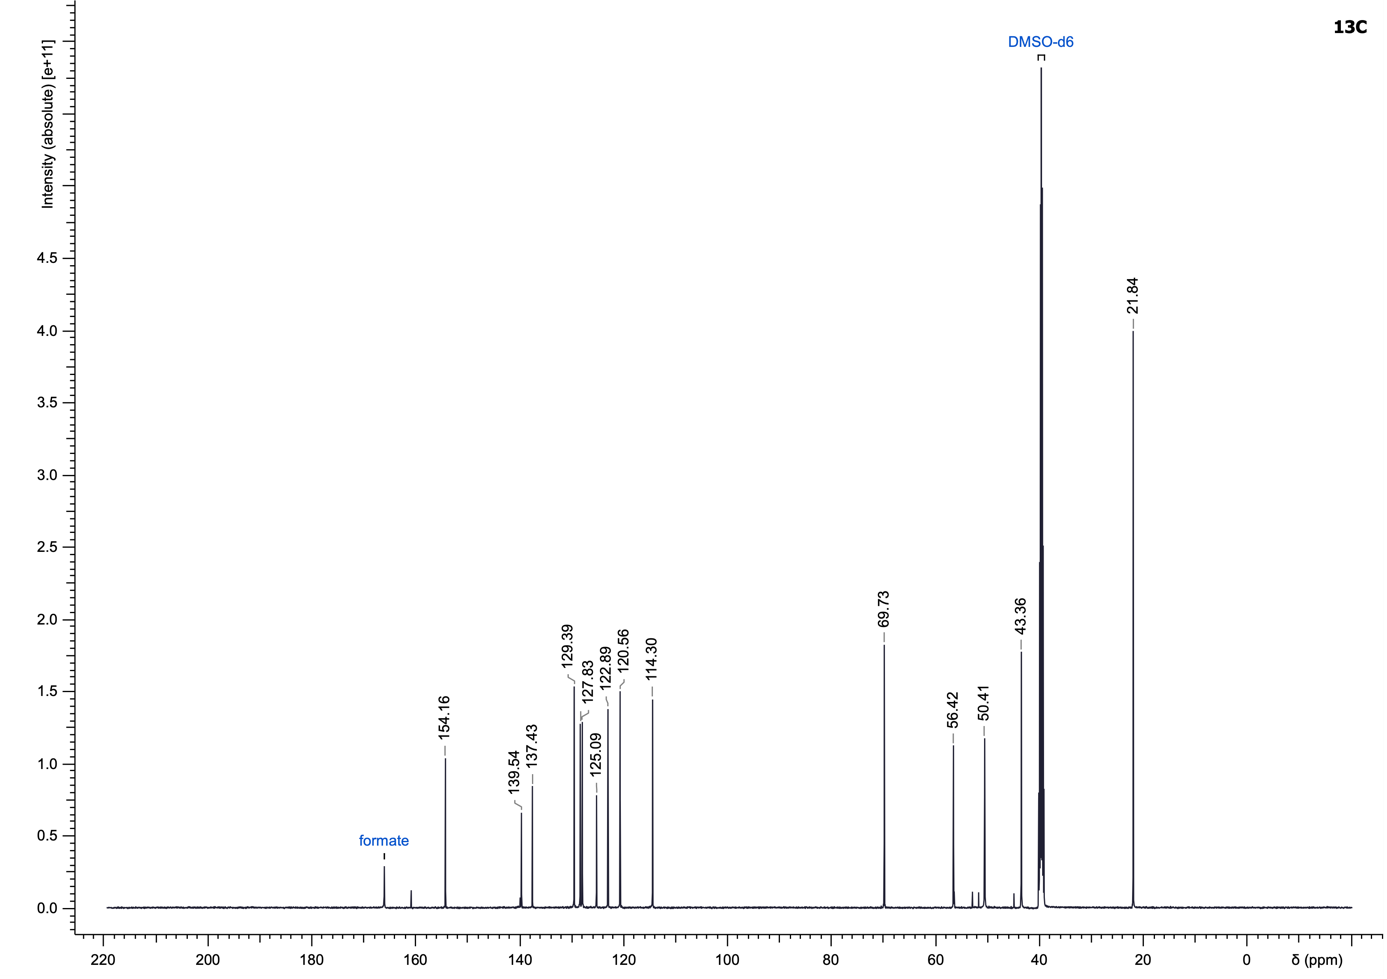


4-((4-(3-Isopropoxyphenyl)thiophen-2-yl)methyl)piperazin-1-ium formate (26)

Compound **26** was synthesized according to the **General Procedure C** using 1-((4-bromothiophen-2-yl)methyl)piperazine dihydrochloride (897.94 µmol) and (3-isopropoxyphenyl)boronic acid as starting materials. The reaction mixture was heated at 80 °C for 120 min. Then (3-isopropoxyphenyl)boronic acid (1.0 eq) was added, the vial was sealed, evacuated and backfilled with N2 (three times) and the resulting mixture was further degassed by sparging with N2 for 30 min, after which the vial was resealed and heated at 80 °C for 30 min. The compound was purified using water/acetonitrile + 1% formic acid (5 to 45% acetonitrile) to yield a dark orange solid (263.0 mg, 81%).

**LC–MS** (ESI): tR = 2.70 min; > 99% purity (UV at 254 nm);

**1H NMR** (500 MHz, DMSO-*d*6): *δ* 7.78 (s, 1H), 7.42 (s, 1H), 7.28 (t, *J* = 8.0 Hz, 1H), 7.20 (br d, *J* = 7.9 Hz, 1H), 7.18 (s, 1H), 6.82 (br d, *J* = 8.1 Hz, 1H), 5.59 (br s, 2H), 4.68 (sept, *J* = 6.1 Hz, 1H), 3.75 (s, 2H), 3.04 (br s, 4H), 2.60 (br s, 4H), 1.27 (d, *J* = 6.1 Hz, 6H);

**13C NMR** (126 MHz, DMSO-*d*6): *δ* 158.4, 141.9, 141.0, 137.0, 130.4, 126.2, 121.4, 118.5, 114.6, 113.7, 69.5, 56.5, 49.7 (2C), 43.3 (2C), 22.3 (2C);

**HRMS** (ESI+) *m*/*z*: [M+H]+ calculated for C18H24N2OS, 317.1682; found, 317.1682.


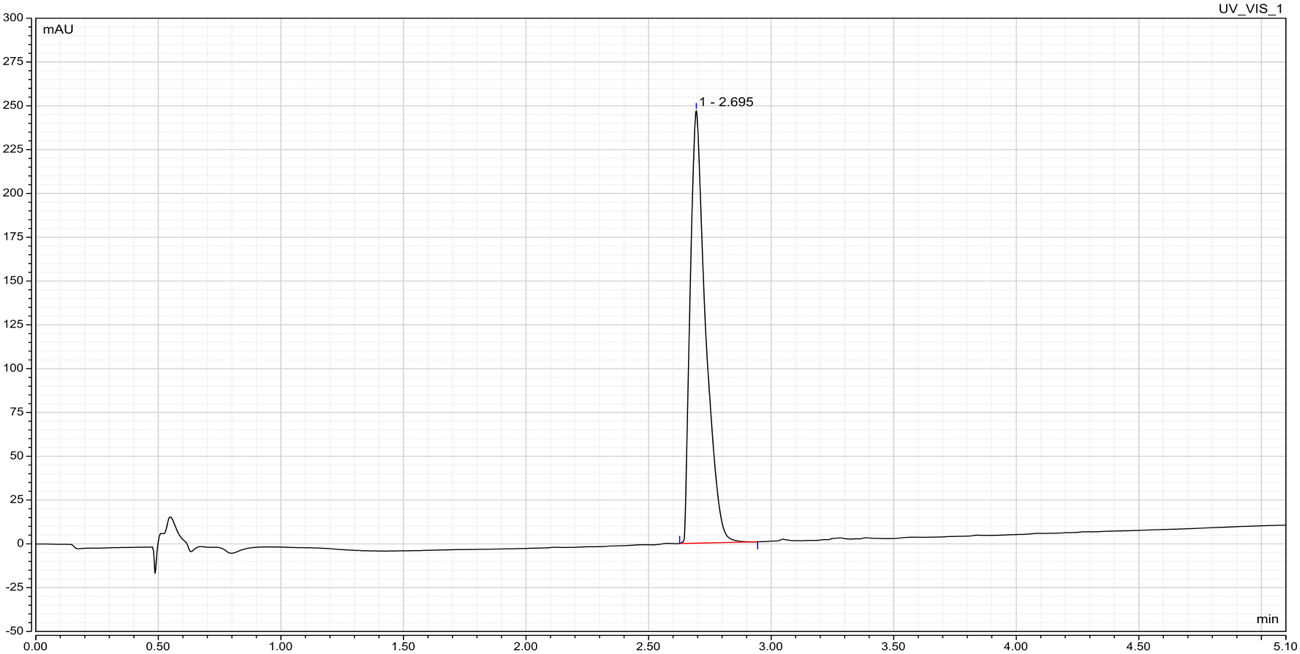


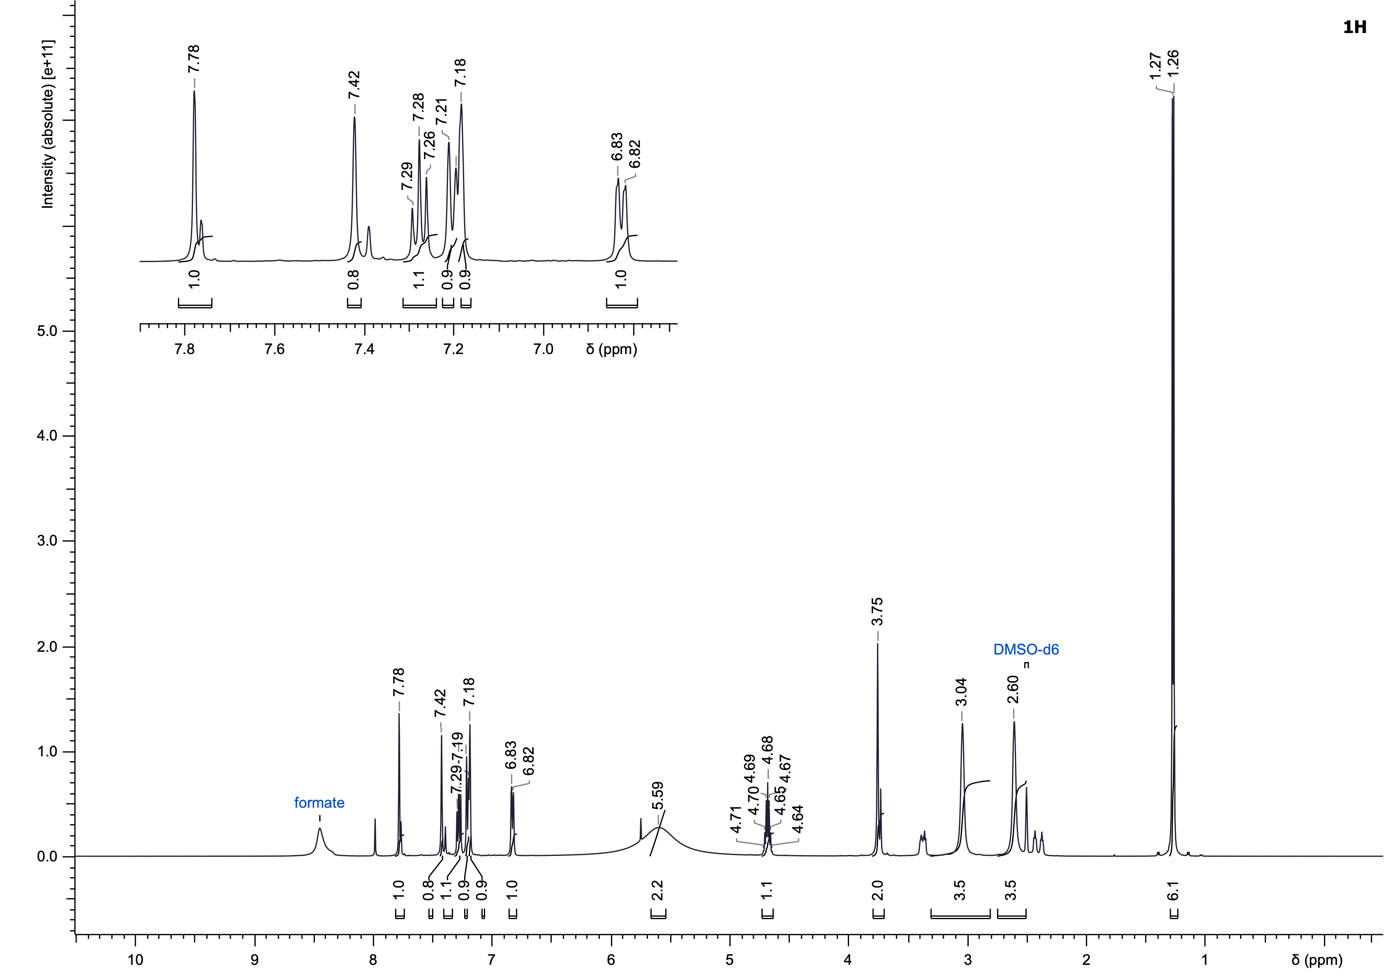


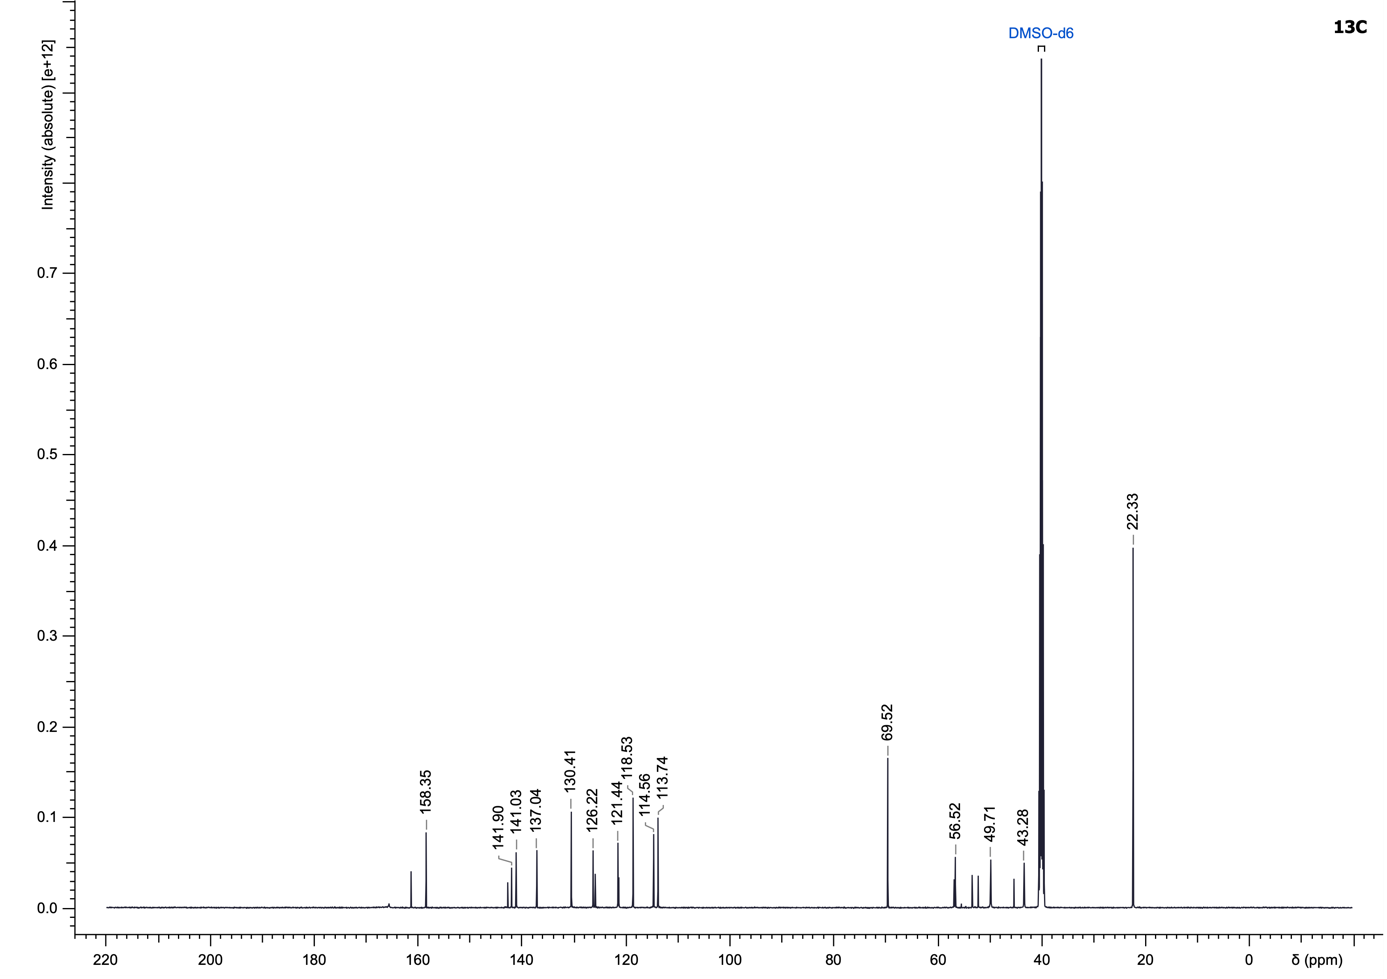


(*R*)-1-(4-(4-Chlorobenzoyl)piperazin-1-yl)-2,3-diphenylpropan-1-one (27)

Compound **27** was synthesized according to the **General Procedure D** using (*R*)-2,3-diphenylpropanoic acid and (4-chlorophenyl)(piperazin-1-yl)methanone (356.05 µmol) as starting materials and purified using water/acetonitrile + 0.05% formic acid (5 to 100% acetonitrile) to yield a white solid (15.8 mg, 10%).

**LC–MS** (ESI): tR = 3.83 min; 97% purity (UV at 254 nm);

**1H NMR** (500 MHz, CDCl3): *δ* 7.36 (br d, *J* = 8.1 Hz, 2H), 7.31–7.16 (m, 10H), 7.08 (br d, *J* = 7.2 Hz, 2H), 4.09–3.54 (m, 3H), 3.50 (dd, *J* = 13.5, 8.0 Hz, 1H), 3.41 (br s, 5H), 2.96 (br dd, *J* = 13.4, 6.4 Hz, 2H);

**13C NMR** (126 MHz, CDCl3): *δ* 171.4, 169.5, 139.8, 139.4, 136.3, 133.6, 129.4 (2C), 129.1 (2C), 129.0 (2C), 128.7 (2C), 128.4 (2C), 128.0 (2C), 127.5, 126.5, 51.3, 47.5, 45.6, 42.1 (2C), 41.1;

**HRMS** (ESI+) *m*/*z*: [M+H]+ calculated for C26H25ClN2O2, 433.1678; found, 433.1683.


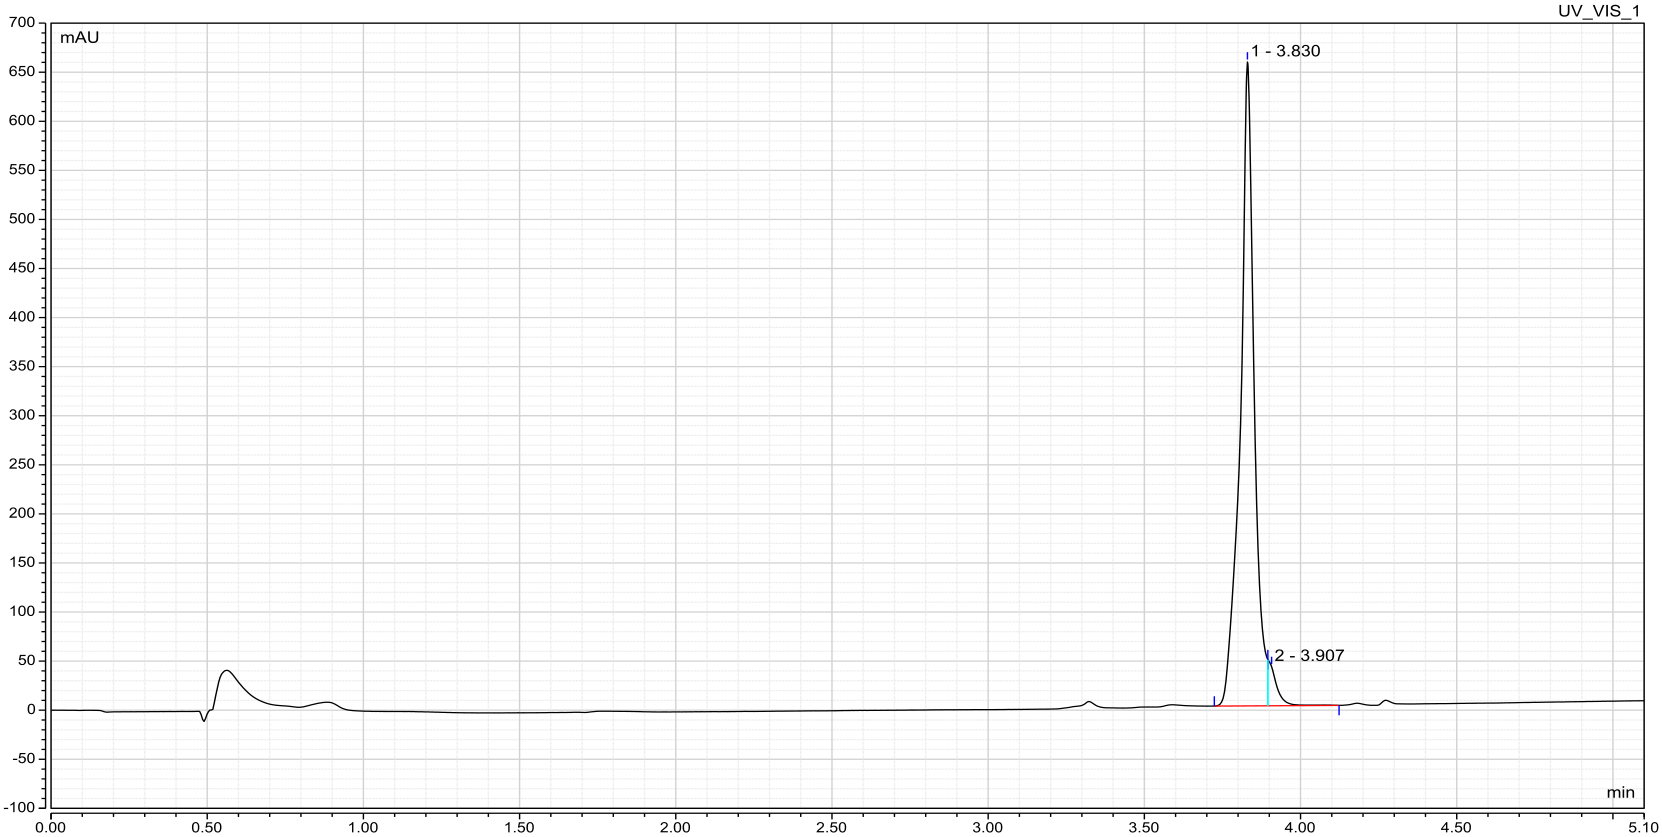


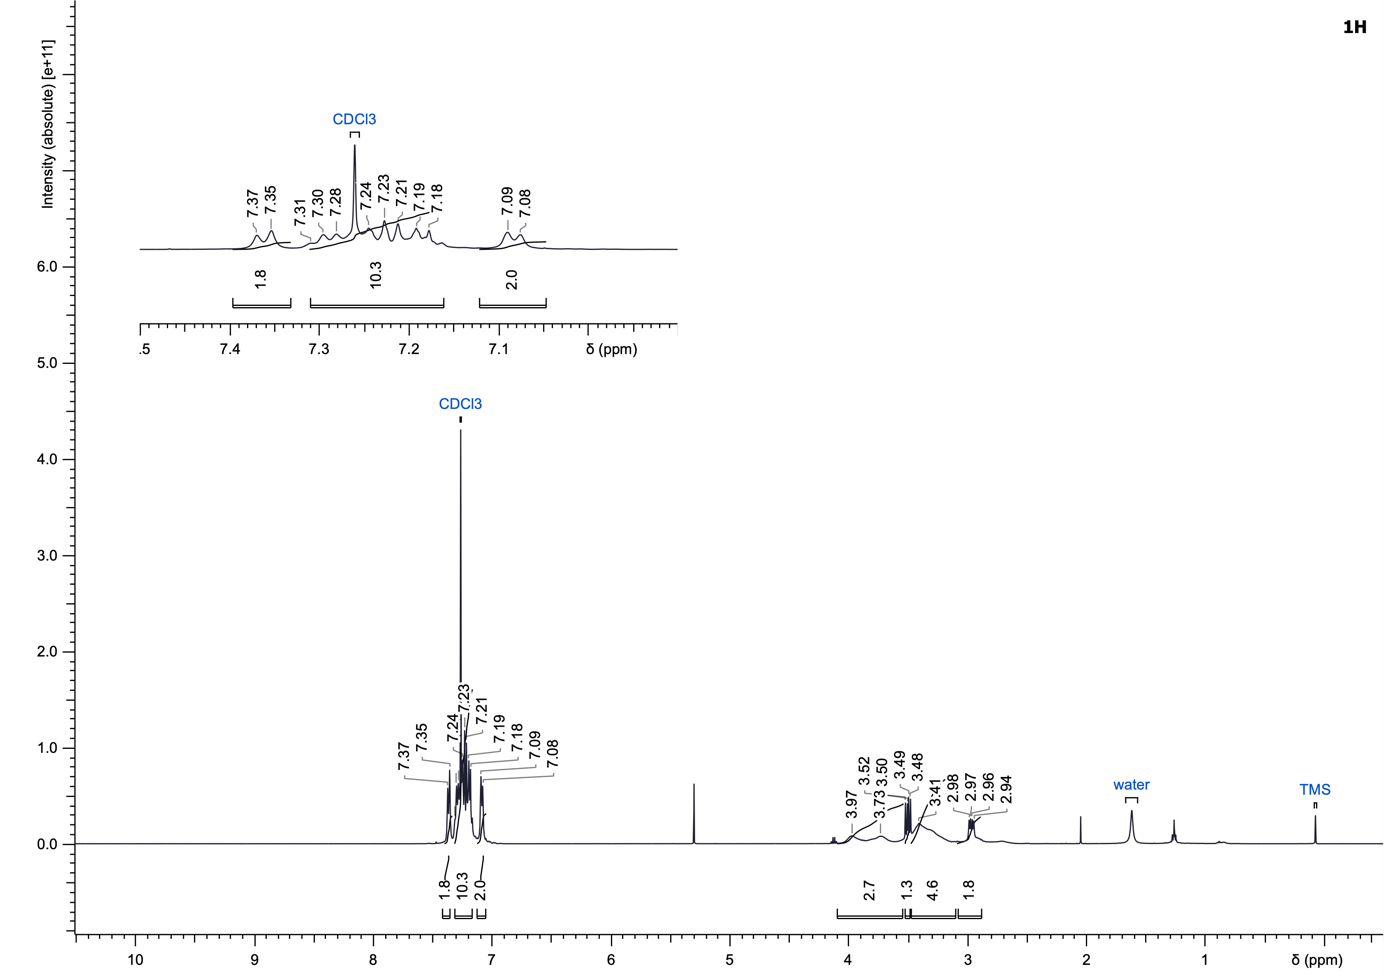


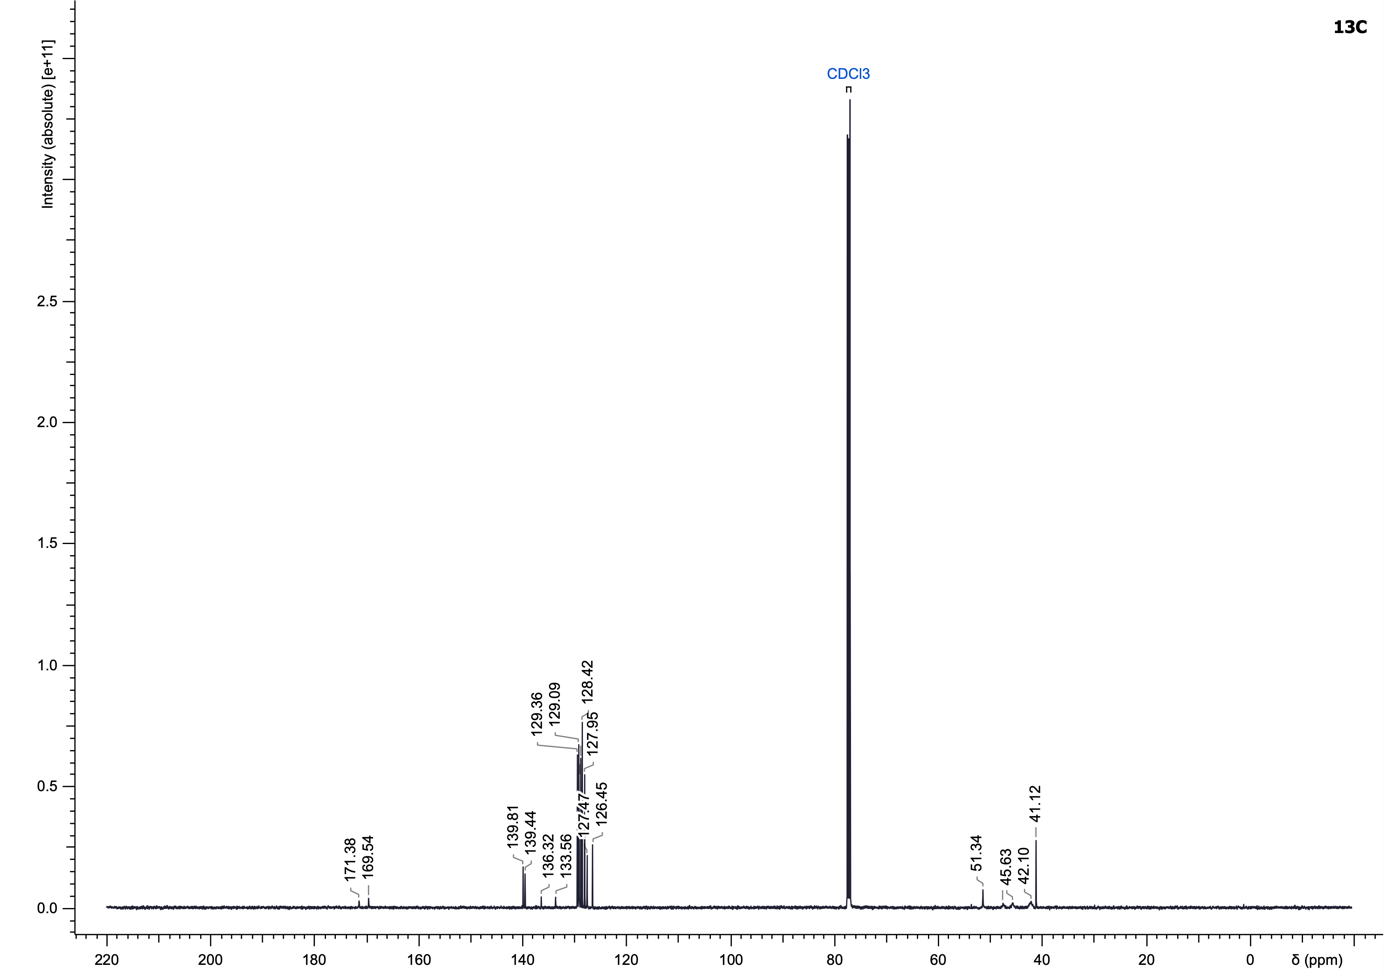


1-(4-(4-Chlorobenzoyl)piperazin-1-yl)-2-(3-(trifluoromethyl)phenyl)ethan-1-one (28)

Compound **28** was synthesized according to the **General Procedure D** using 2-(3-(trifluoromethyl)phenyl)acetic acid and (4-chlorophenyl)(piperazin-1-yl)methanone (222.53 µmol) as starting materials and purified using water/acetonitrile + 0.05% formic acid (5 to 100% acetonitrile) to yield a white solid (22.1 mg, 24%).

**LC–MS** (ESI): tR = 3.51 min; 98% purity (UV at 254 nm);

**1H NMR** (500 MHz, CDCl3): *δ* 7.58–7.47 (m, 2H), 7.47–7.42 (m, 2H), 7.42–7.38 (m, 2H), 7.36–7.32 (m, 2H), 3.81 (br s, 2H), 3.77–3.15 (m, 8H);

**13C NMR** (126 MHz, CDCl3): *δ* 169.7, 169.0, 136.5, 135.6, 133.4, 132.4, 131.3 (q, *J* = 32.4 Hz), 129.4, 129.1 (2C), 128.8 (2C), 125.7, 124.2 (q, *J* = 3.7 Hz), 47.5 (2C), 46.0, 42.1 (2C), 40.5;

**19F NMR** (470 MHz, DMSO-*d*6): *δ* -61.0;

**HRMS** (ESI+) *m*/*z*: [M+H]+ calculated for C20H18ClF3N2O2, 411.1082; found, 411.1085.


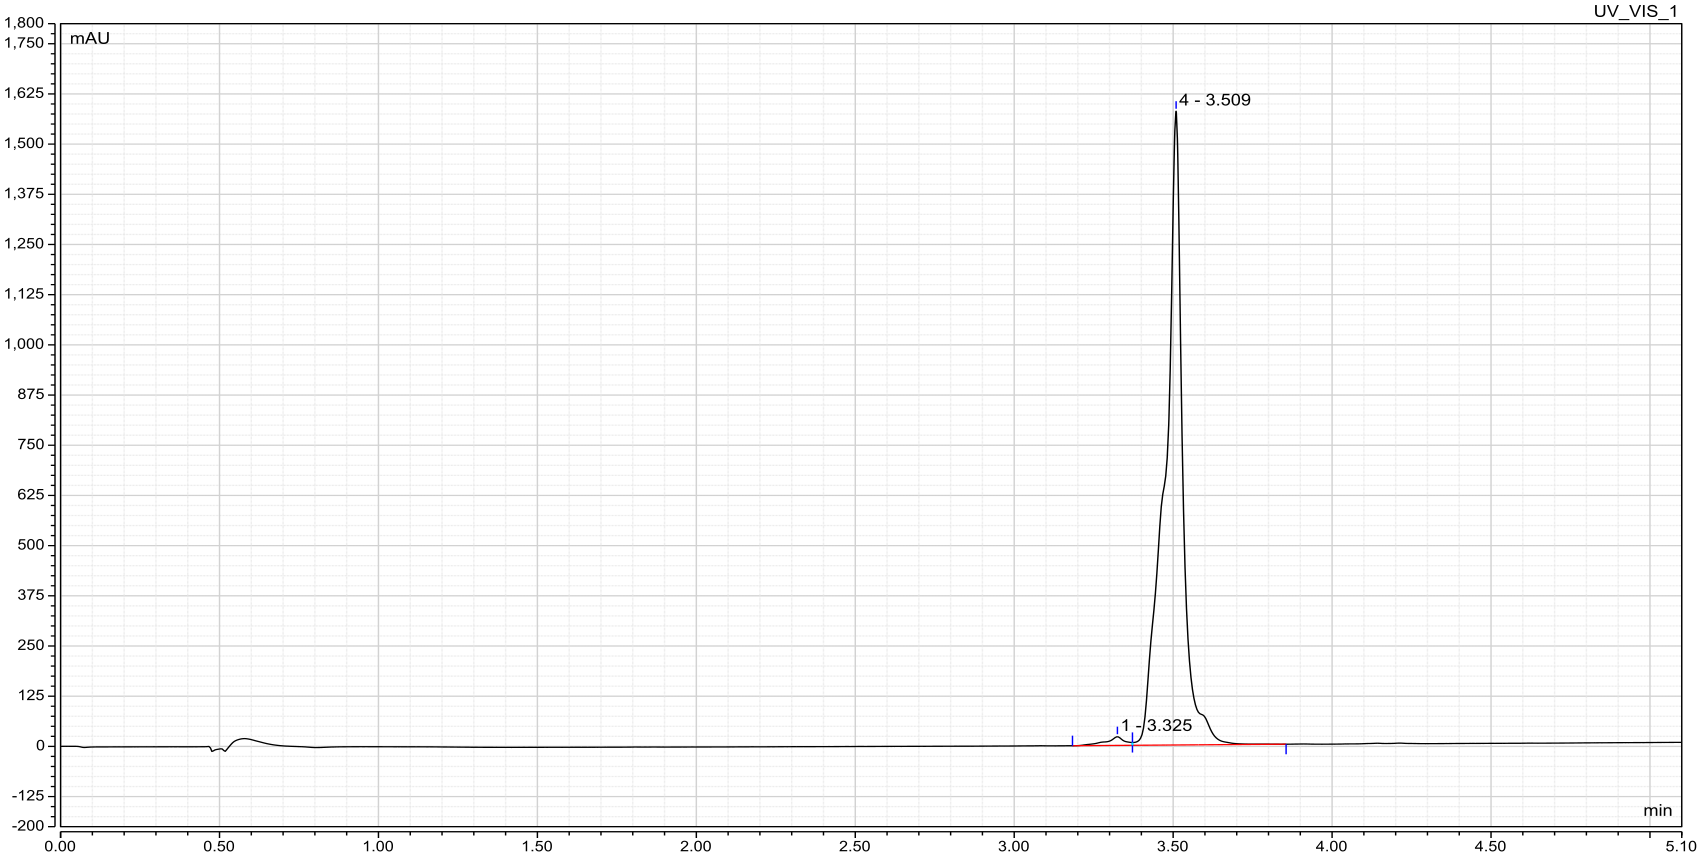


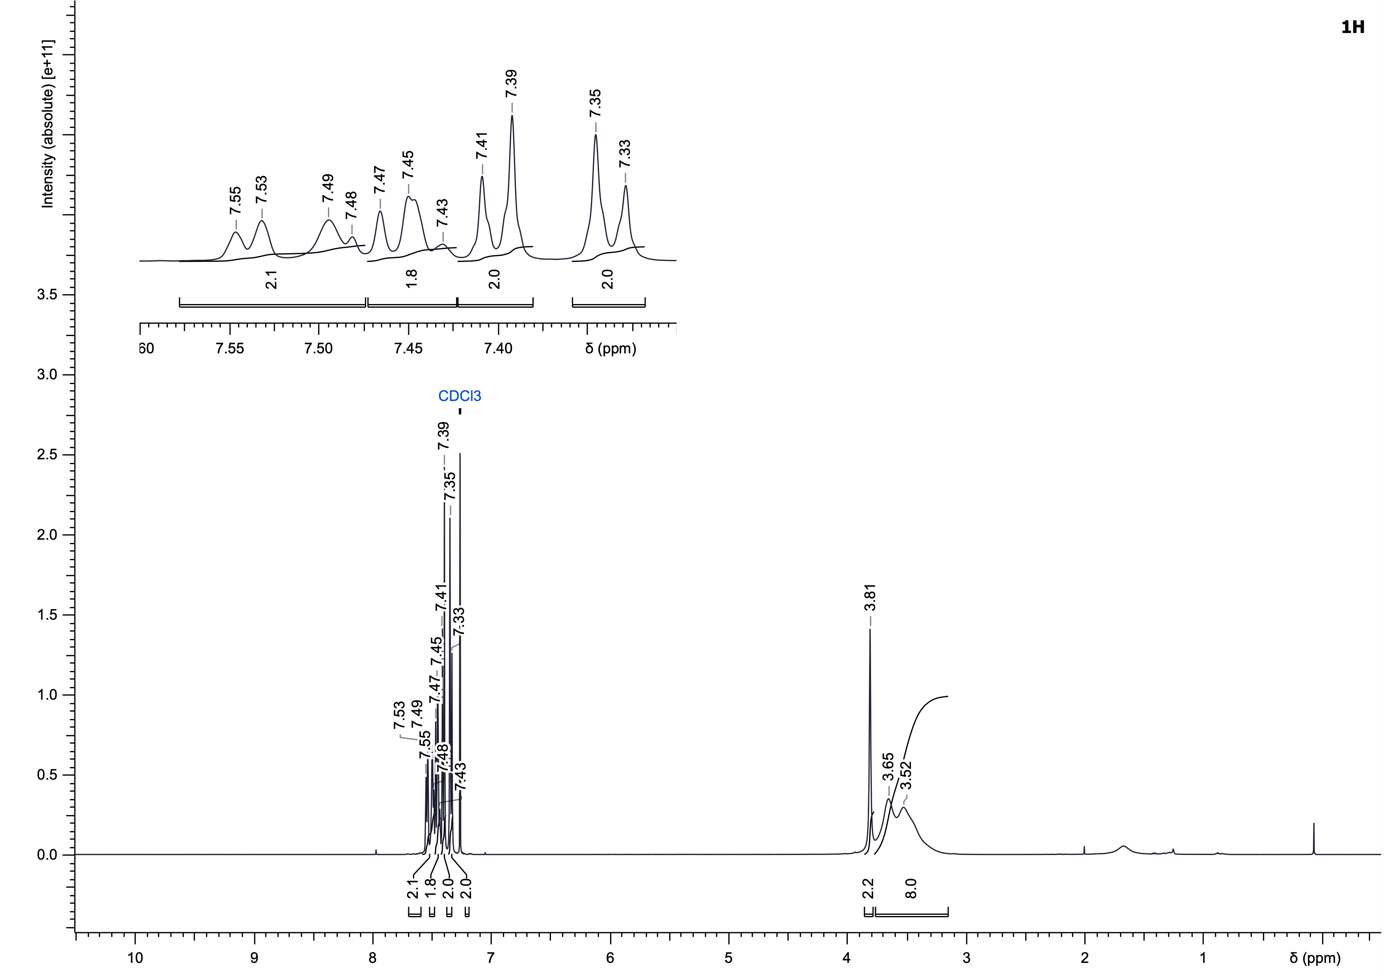


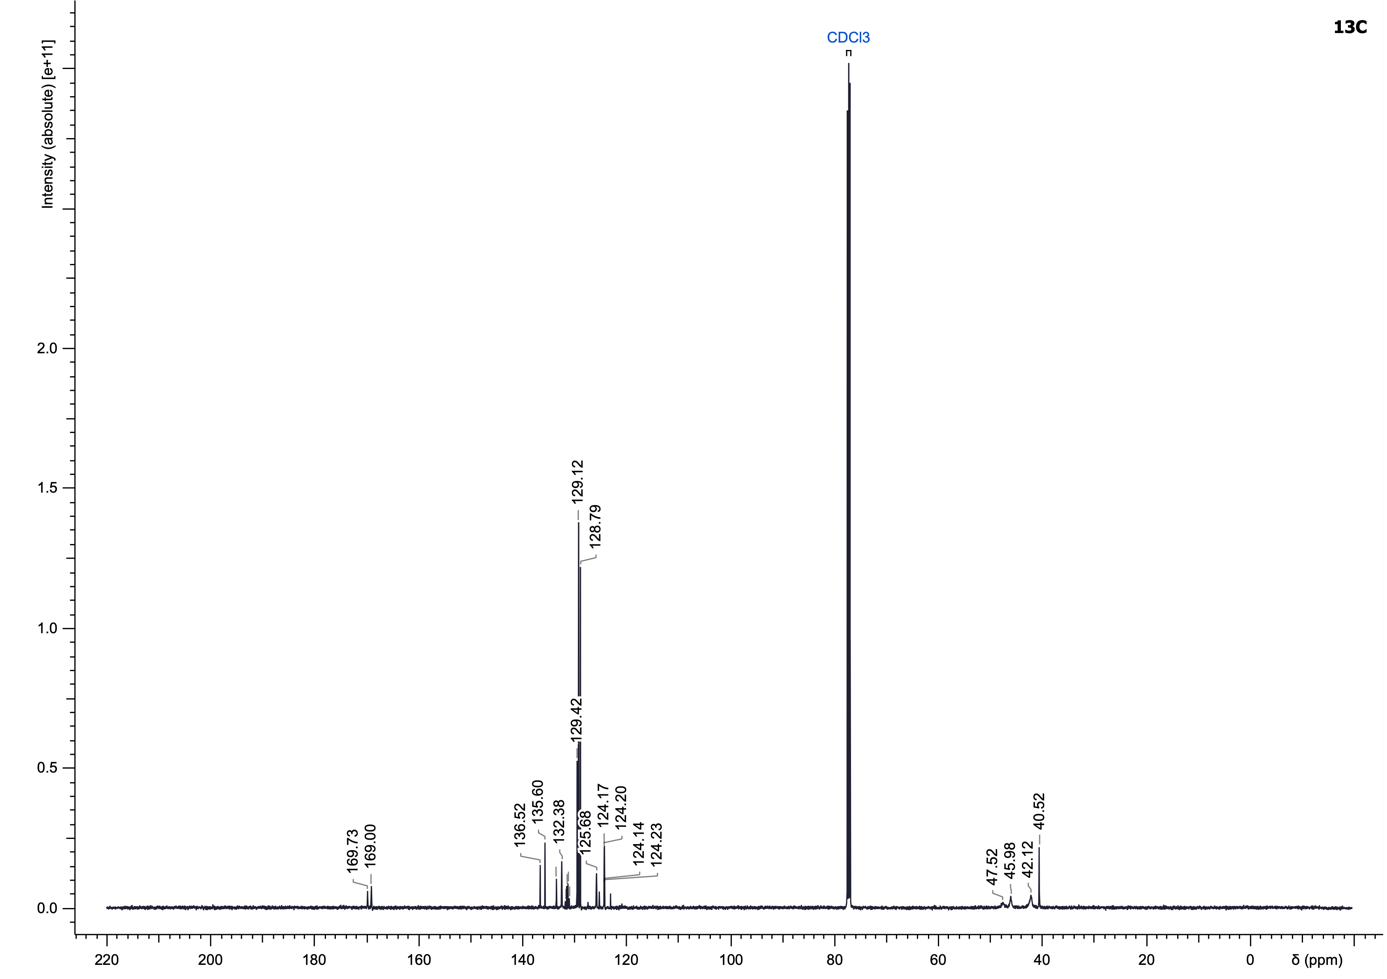


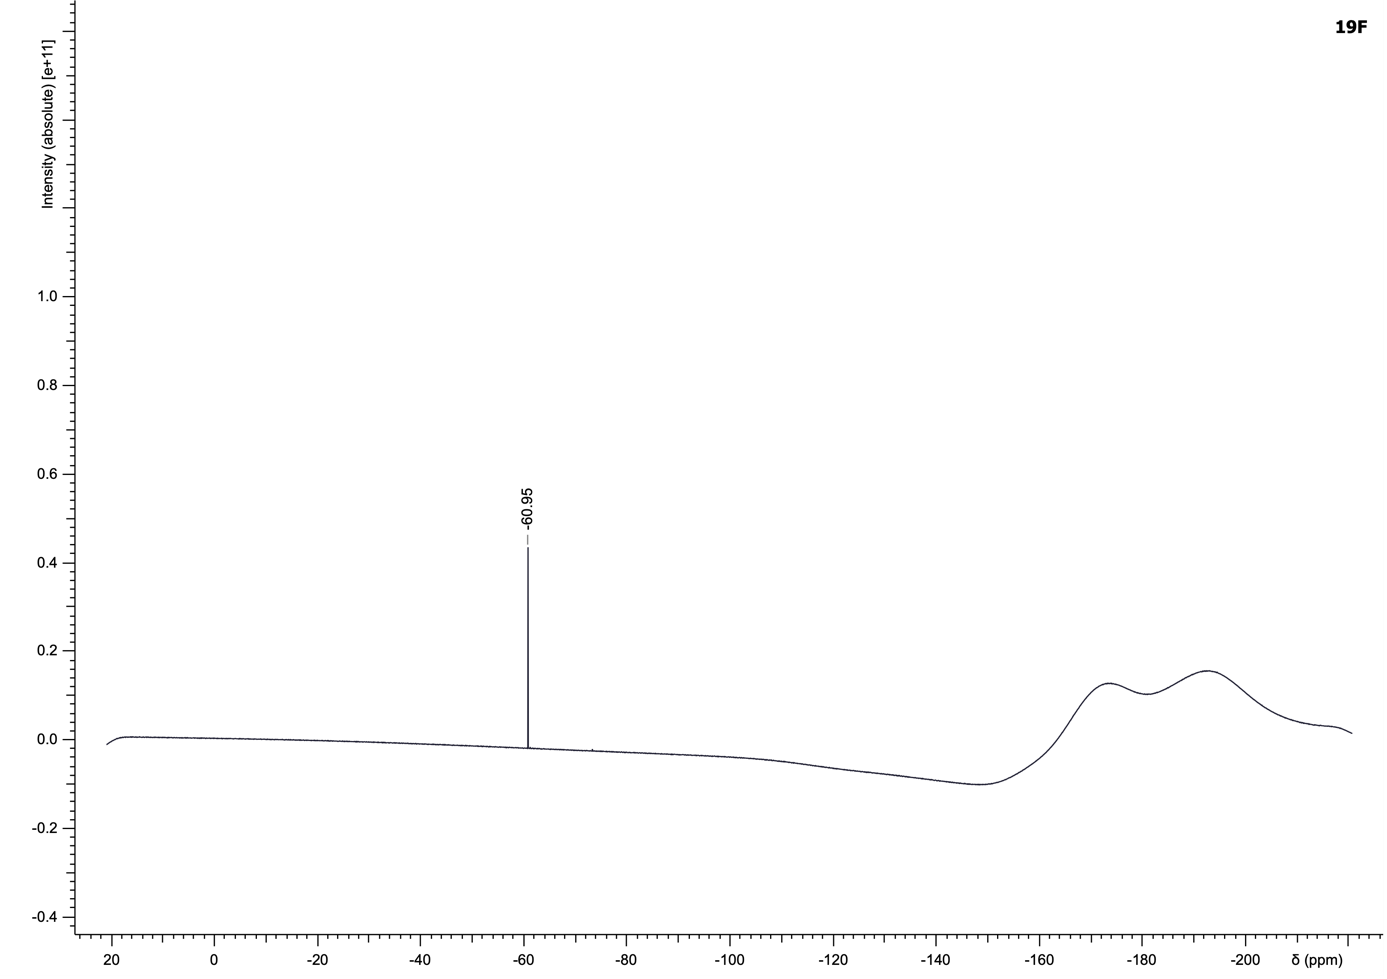


(4-(4-Chlorobenzoyl)piperazin-1-yl)(3,5-dichloropyridin-4-yl)methanone (29)

To a solution of 3,5-dichloroisonicotinic acid (1.2 eq) in DMF (0.2 M) were added triethylamine (3.0 eq), EDC·HCl (2.0 eq), HOBt hydrate (2.0 eq), followed by (4-chlorophenyl)(piperazin-1-yl)methanone (240.33 µmol, 1.0 eq). The reaction mixture was stirred at room temperature overnight. Upon completion, the reaction mixture was diluted with ethyl acetate (10 mL), washed with a cold mixture of water/brine (1:1, 3 × 15 mL) and brine (15 mL), dried over MgSO4 and concentrated under reduced pressure. The crude product was purified by normal-phase flash chromatography on silica gel using a gradient of cyclohexane/ethyl acetate (25 to 100% ethyl acetate) to yield the desired amide **29** as a white solid (23.9 mg, 25%).

**LC–MS** (ESI): tR = 3.08 min; > 99% purity (UV at 254 nm);

**1H NMR** (500 MHz, CDCl3): *δ* 8.56 (s, 2H), 7.41 (br d, *J* = 7.6 Hz, 2H), 7.37 (br d, *J* = 8.1 Hz, 2H), 3.97–3.40 (m, 6H), 3.27 (br s, 2H);

**13C NMR** (126 MHz, CDCl3): *δ* 169.8, 161.7, 148.0 (2C), 141.5, 136.7, 133.2, 129.2 (2C), 128.8 (2C), 128.7 (2C), 46.2 (2C), 41.8 (2C);

**HRMS** (ESI+) *m*/*z*: [M+H]+ calculated for C17H14Cl3N3O2, 398.0225; found, 398.0228.


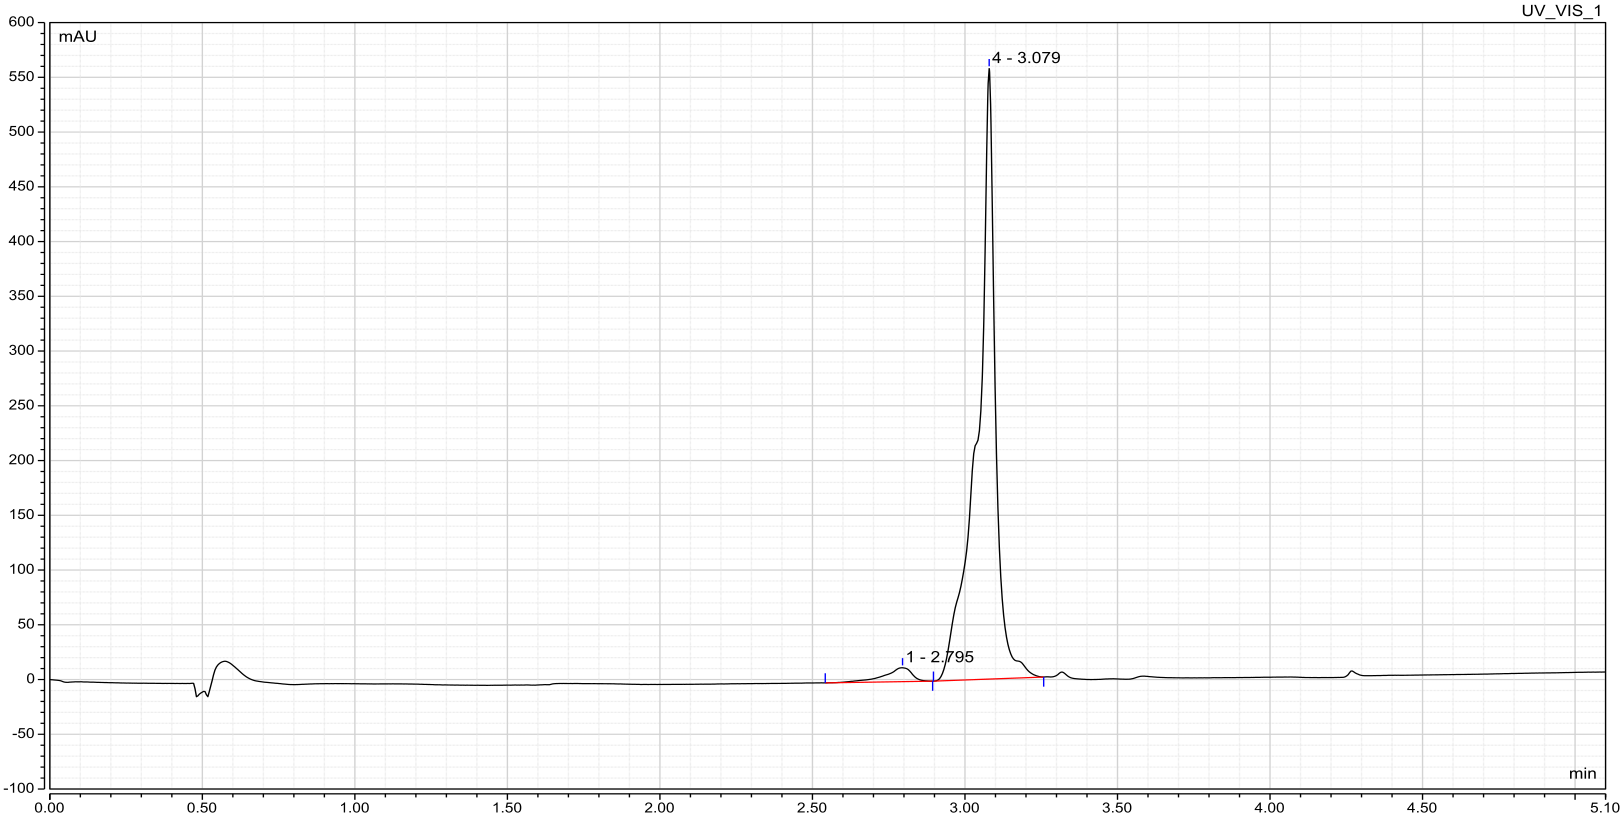


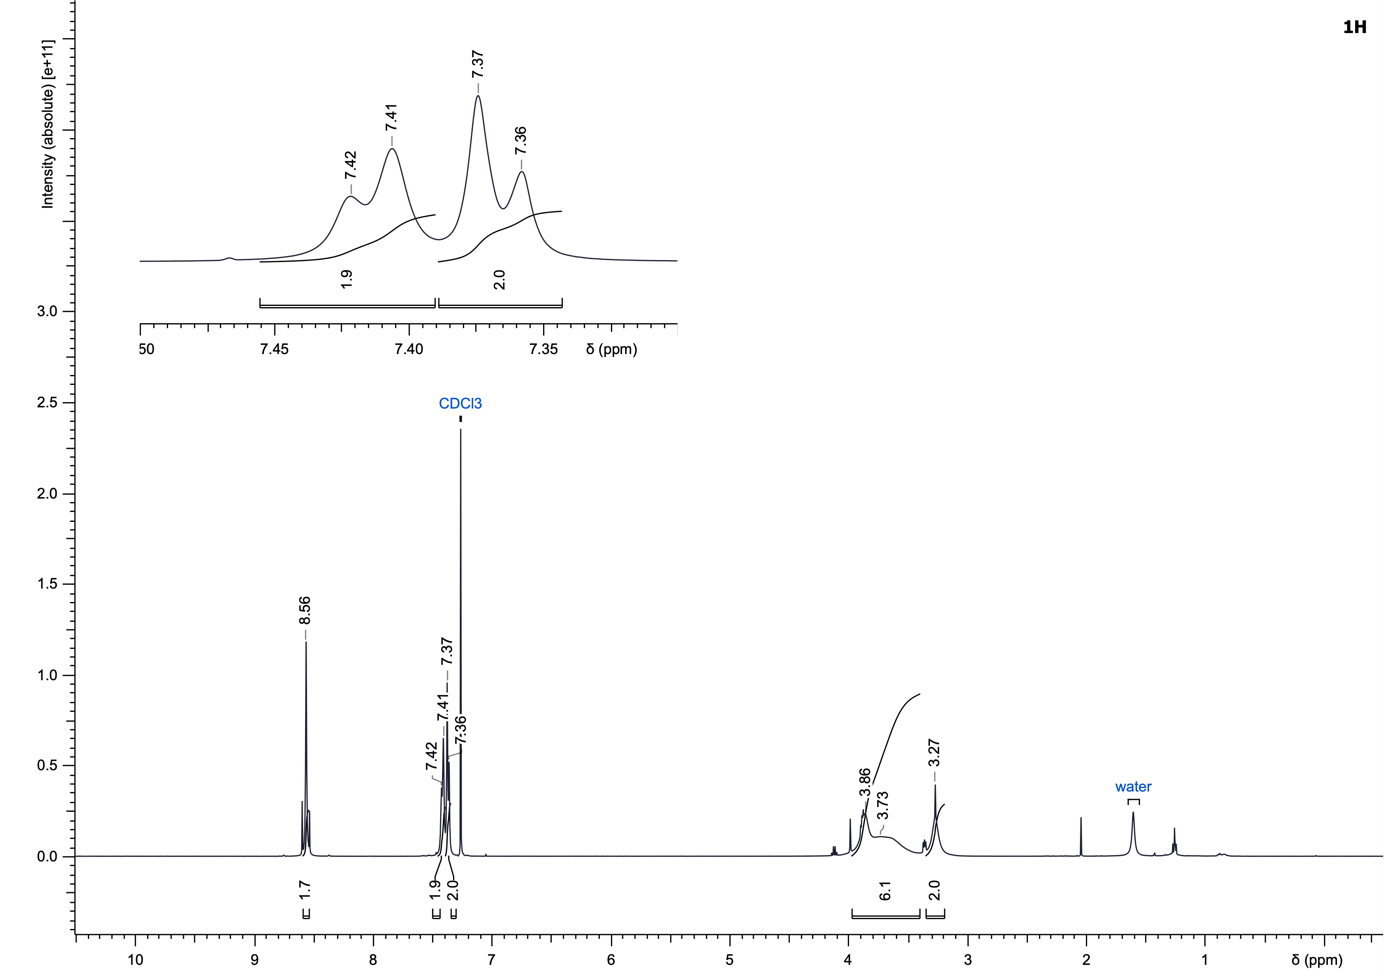


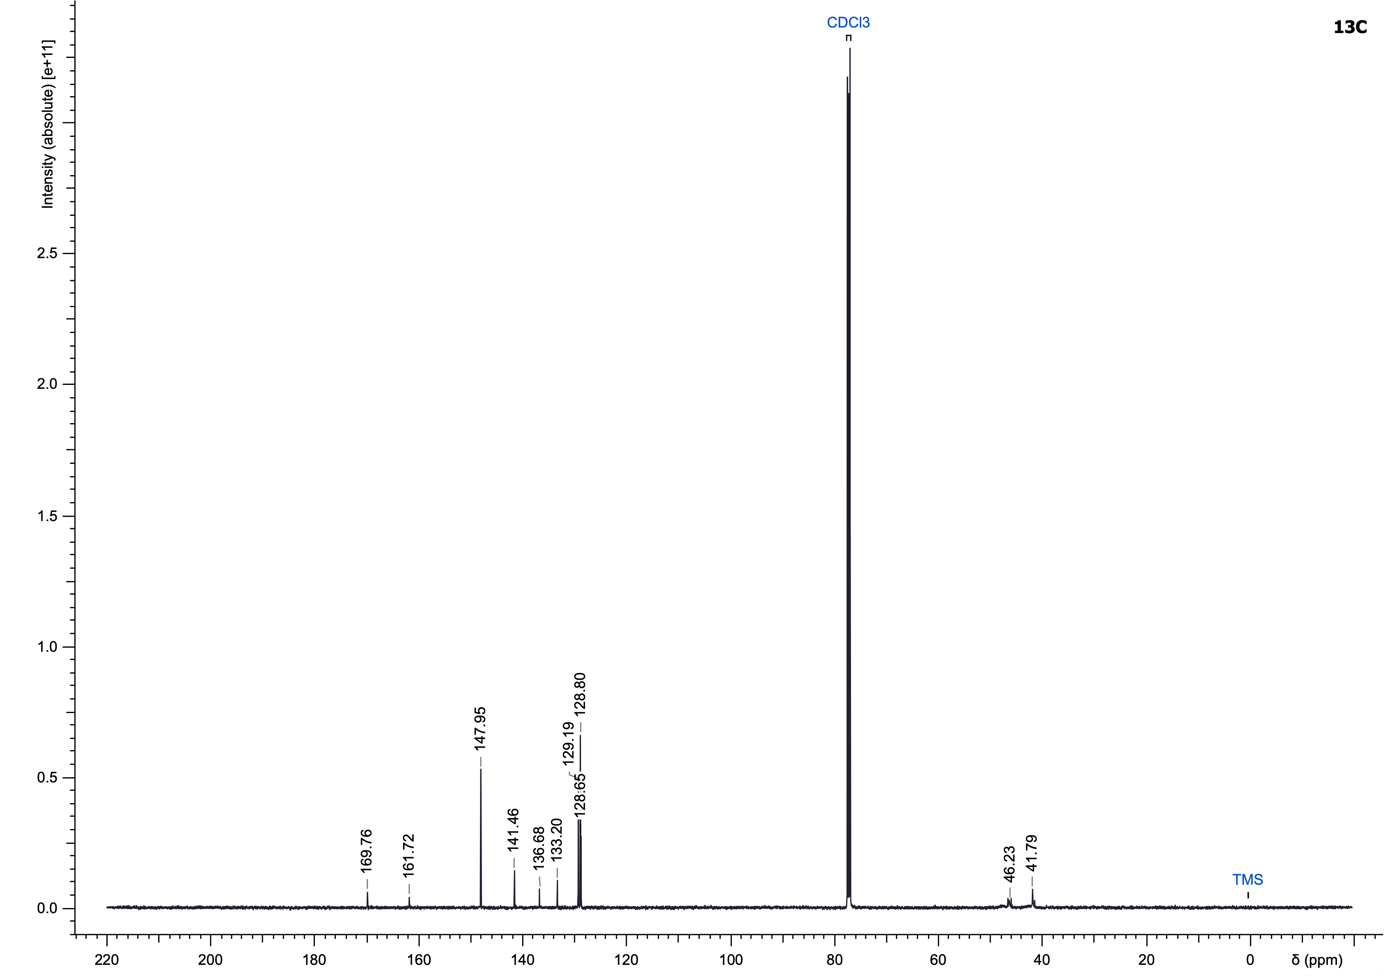


1-(4-(4-Chlorobenzoyl)piperazin-1-yl)-3-phenylpropan-1-one (30)

Compound **30** was synthesized according to the **General Procedure E** using 3-phenylpropanoic acid and (4-chlorophenyl)(piperazin-1-yl)methanone (267.04 µmol) as starting materials and purified using cyclohexane/ethyl acetate (25 to 100% ethyl acetate) to yield a white solid (33.6 mg, 35%).

**LC–MS** (ESI): tR = 3.29 min; > 99% purity (UV at 254 nm);

**1H NMR** (500 MHz, CDCl3): *δ* 7.43–7.37 (m, 2H), 7.35–7.27 (m, 4H), 7.25–7.19 (m, 3H), 3.60 (br s, 4H), 3.41 (br s, 4H), 2.99 (t, *J* = 7.7 Hz, 2H), 2.65 (br s, 2H);

**13C NMR** (126 MHz, CDCl3): *δ* 171.1, 169.7, 141.0, 136.4, 133.5, 129.1 (2C), 128.8 (2C), 128.7 (2C), 128.6 (2C), 126.5, 47.5, 45.5, 42.3, 41.8, 35.1, 31.7;

**HRMS** (ESI+) *m*/*z*: [M+H]+ calculated for C20H21ClN2O2, 357.1365; found, 357.1464.


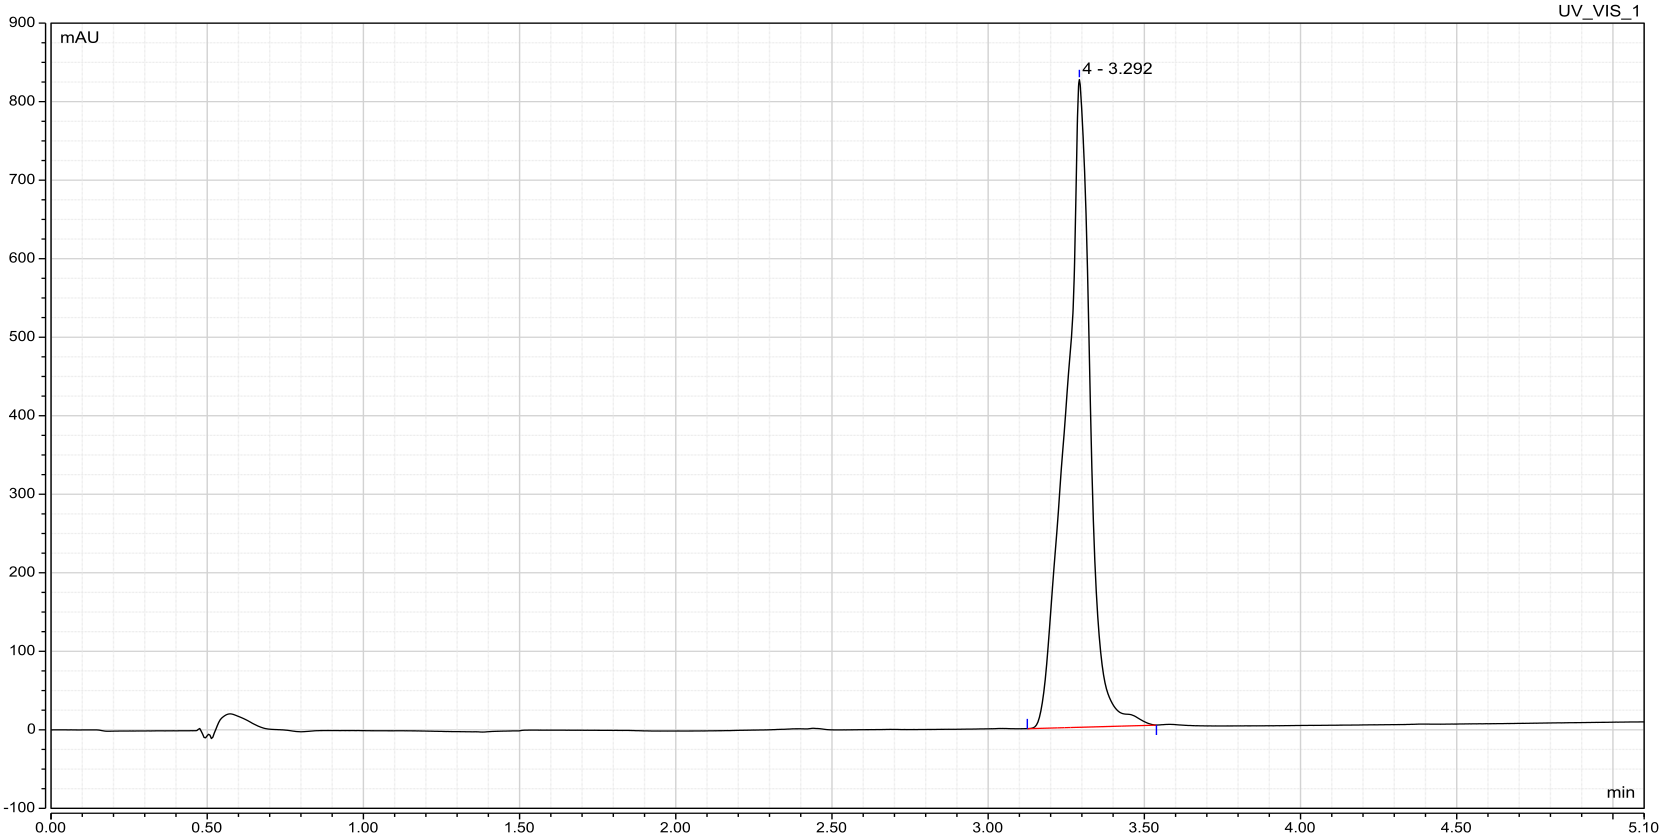


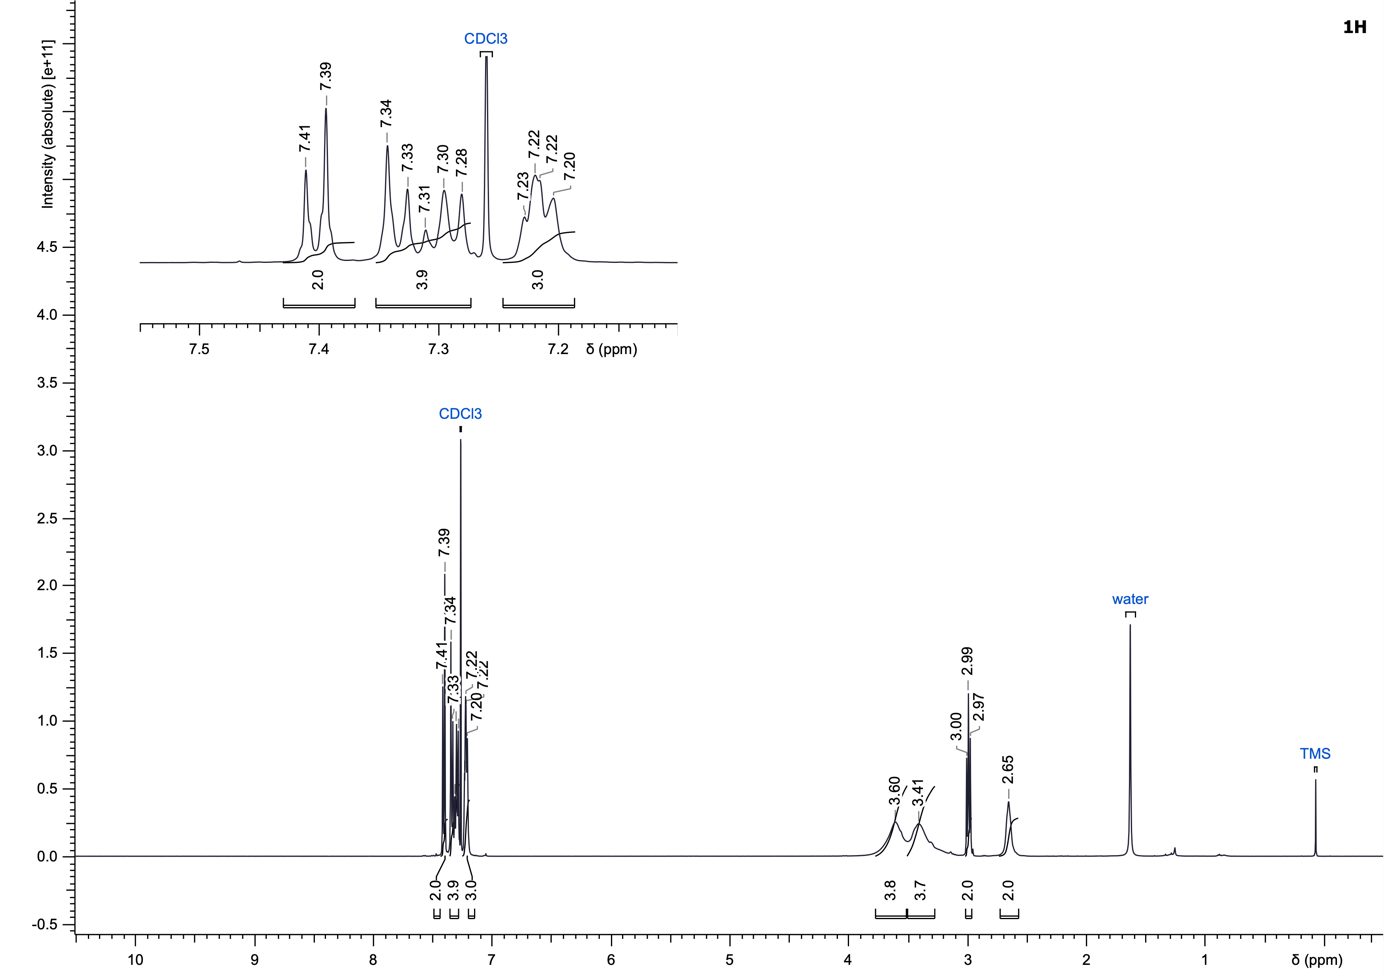


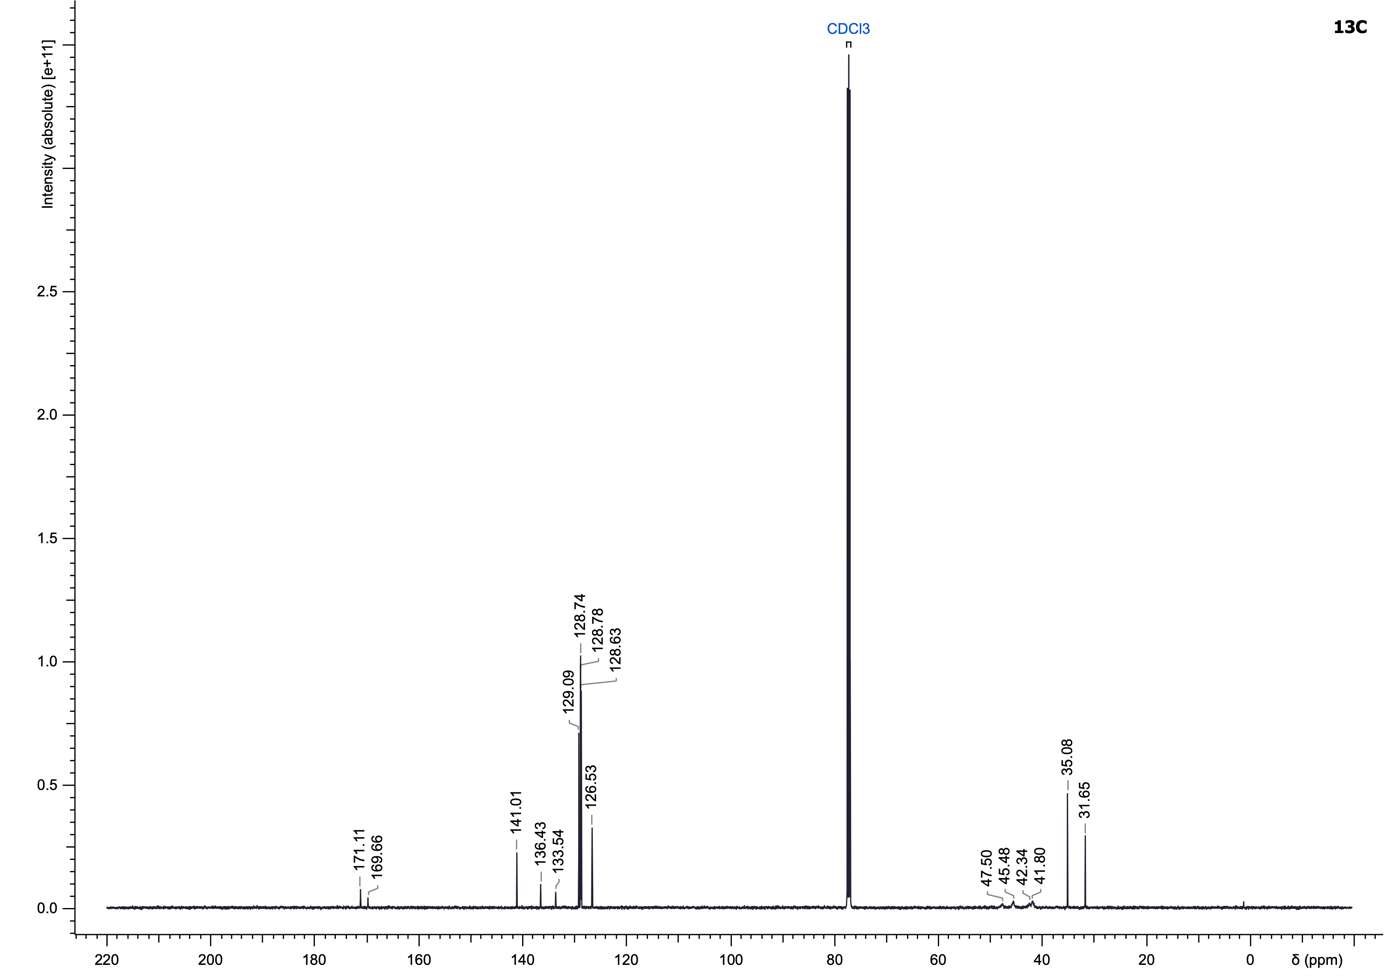


(4-(4-Chlorobenzoyl)piperazin-1-yl)(3-isopropylphenyl)methanone (31)

To a solution of 3-isopropylbenzoic acid (1.2 eq) in DCM (0.2 M) were added triethylamine (4.0 eq) and (4-chlorophenyl)(piperazin-1-yl)methanone (267.04 µmol, 1.0 eq). The reaction mixture was stirred under N2 in an ice bath for 15 min, then propylphosphonic anhydride (50% in EtOAc, 2.0 eq) was added dropwise to the reaction mixture. Upon completion, the reaction mixture was diluted with ethyl acetate (10 mL), washed with saturated NaHCO3 (2 × 10 mL) and water (10 mL). The combined aqueous phases were back-extracted with ethyl acetate (2 × 15 mL). All organic phases were combined, dried over MgSO4 and concentrated under reduced pressure. The crude product was purified by reversed-phase preparative HPLC using a gradient of water/acetonitrile + 0.05% formic acid (5 to 100% acetonitrile) to yield the desired amide **31** as a white solid (54.4 mg, 55%).

**LC–MS** (ESI): tR = 3.60 min; > 99% purity (UV at 254 nm);

**1H NMR** (500 MHz, CDCl3): *δ* 7.41 (br d, *J* = 7.9 Hz, 2H), 7.36 (br d, *J* = 8.2 Hz, 2H), 7.34–7.28 (m, 2H), 7.27 (s, 1H), 7.23–7.16 (m, 1H), 3.73 (br s, 4H), 3.53 (br s, 4H), 2.93 (sept, *J* = 6.9 Hz, 1H), 1.25 (d, *J* = 6.9 Hz, 6H);

**13C NMR** (126 MHz, CDCl3): *δ* 171.2, 169.8, 149.7, 136.4, 135.1, 133.6, 129.1 (2C), 128.8 (2C), 128.7, 128.5, 125.3, 124.5, 47.8 (2C), 42.6 (2C), 34.2, 24.0 (2C);

**HRMS** (ESI+) *m*/*z*: [M+H]+ calculated for C21H23ClN2O2, 371.1521; found, 371.1523.


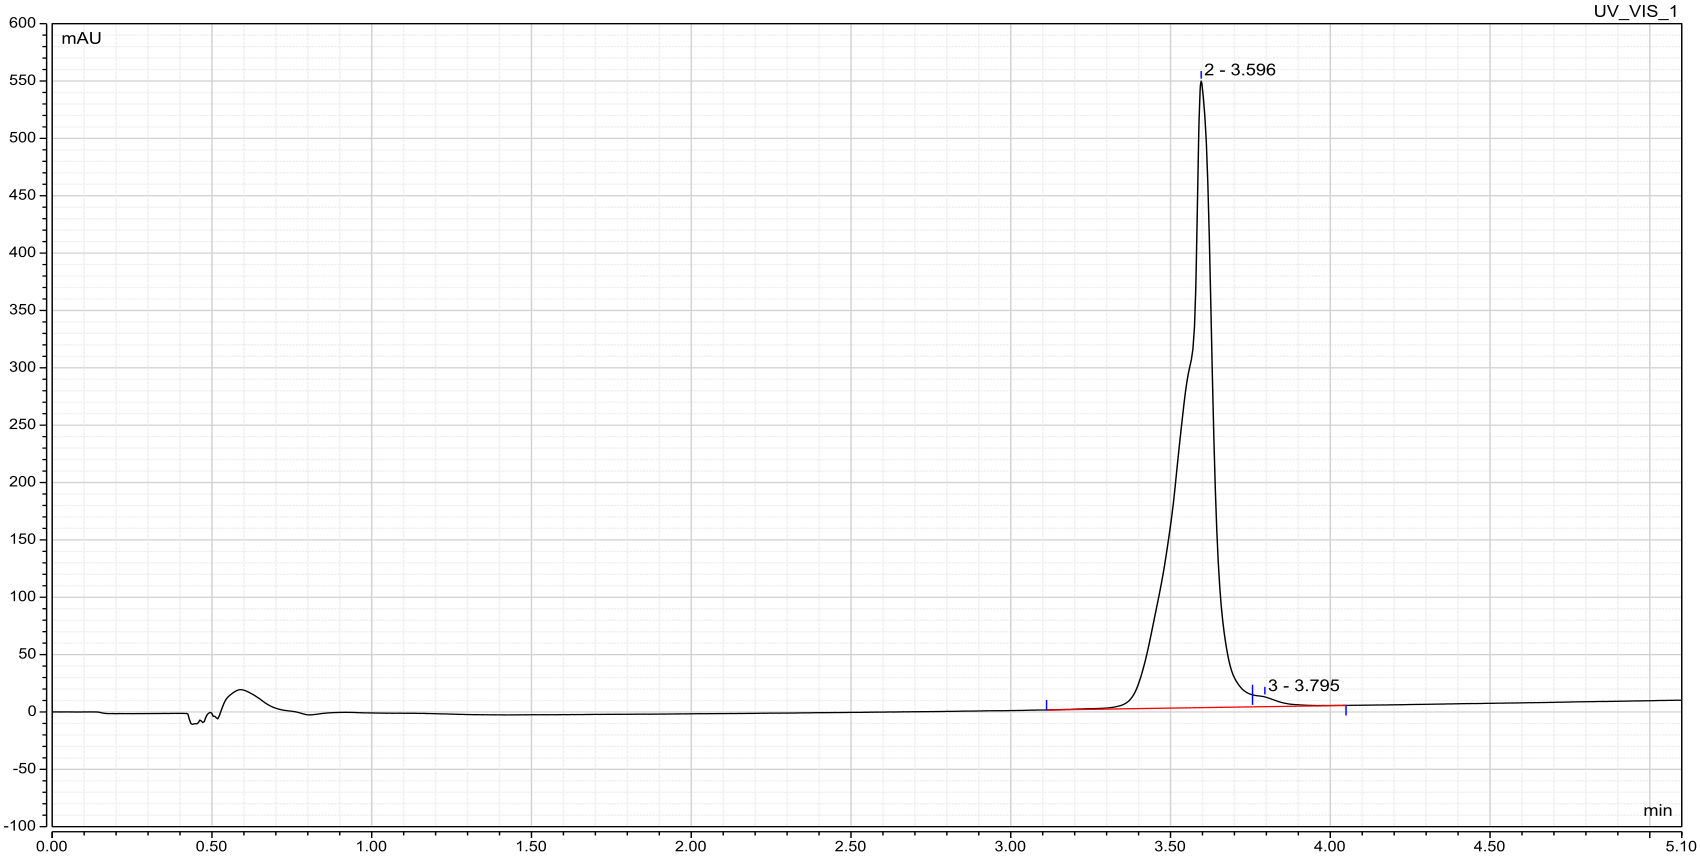


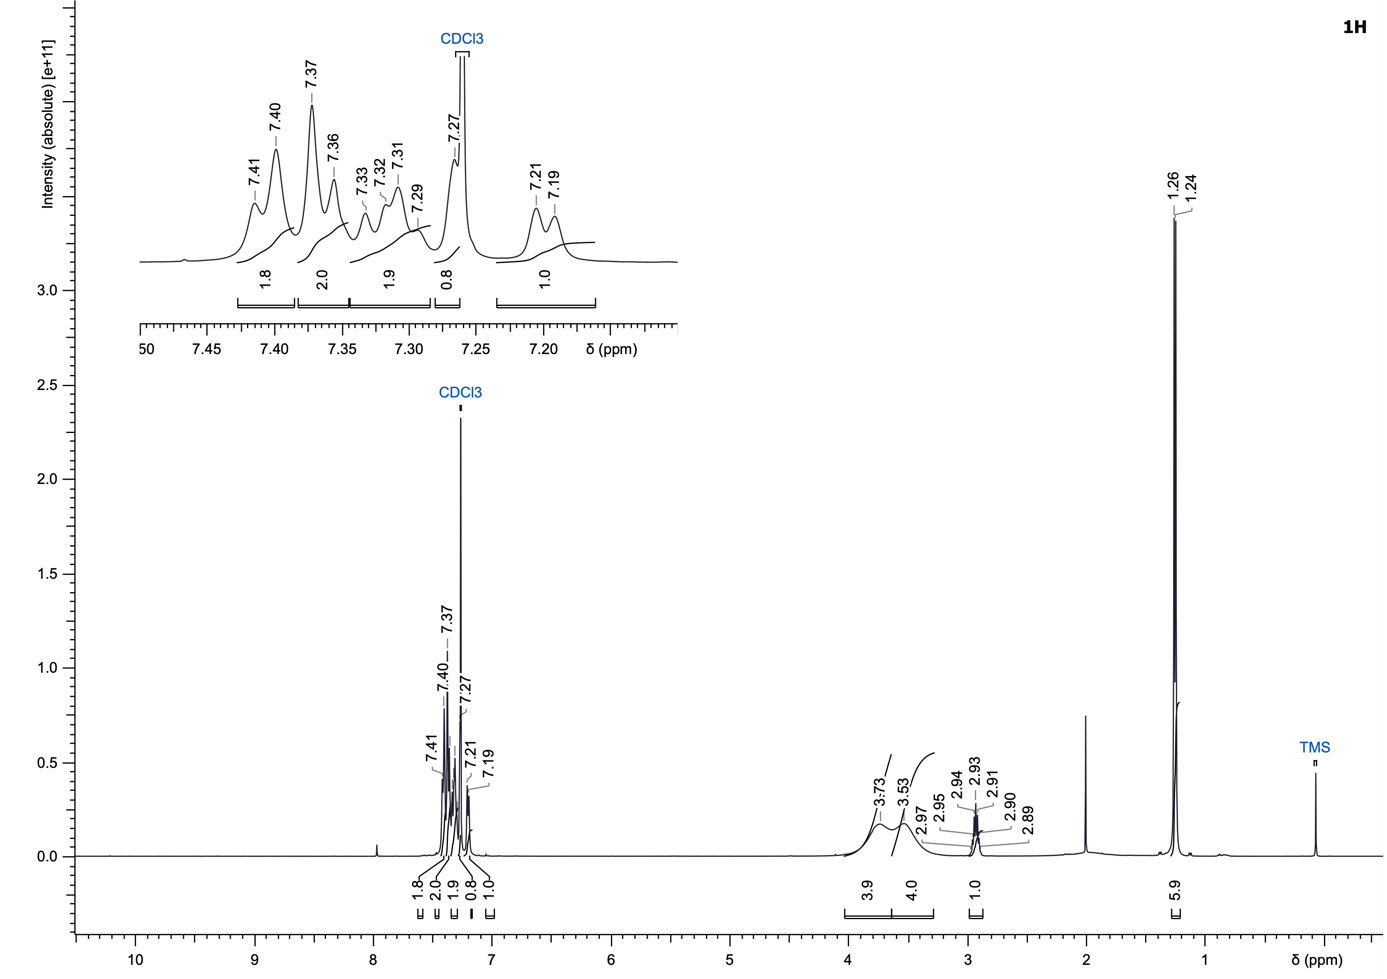


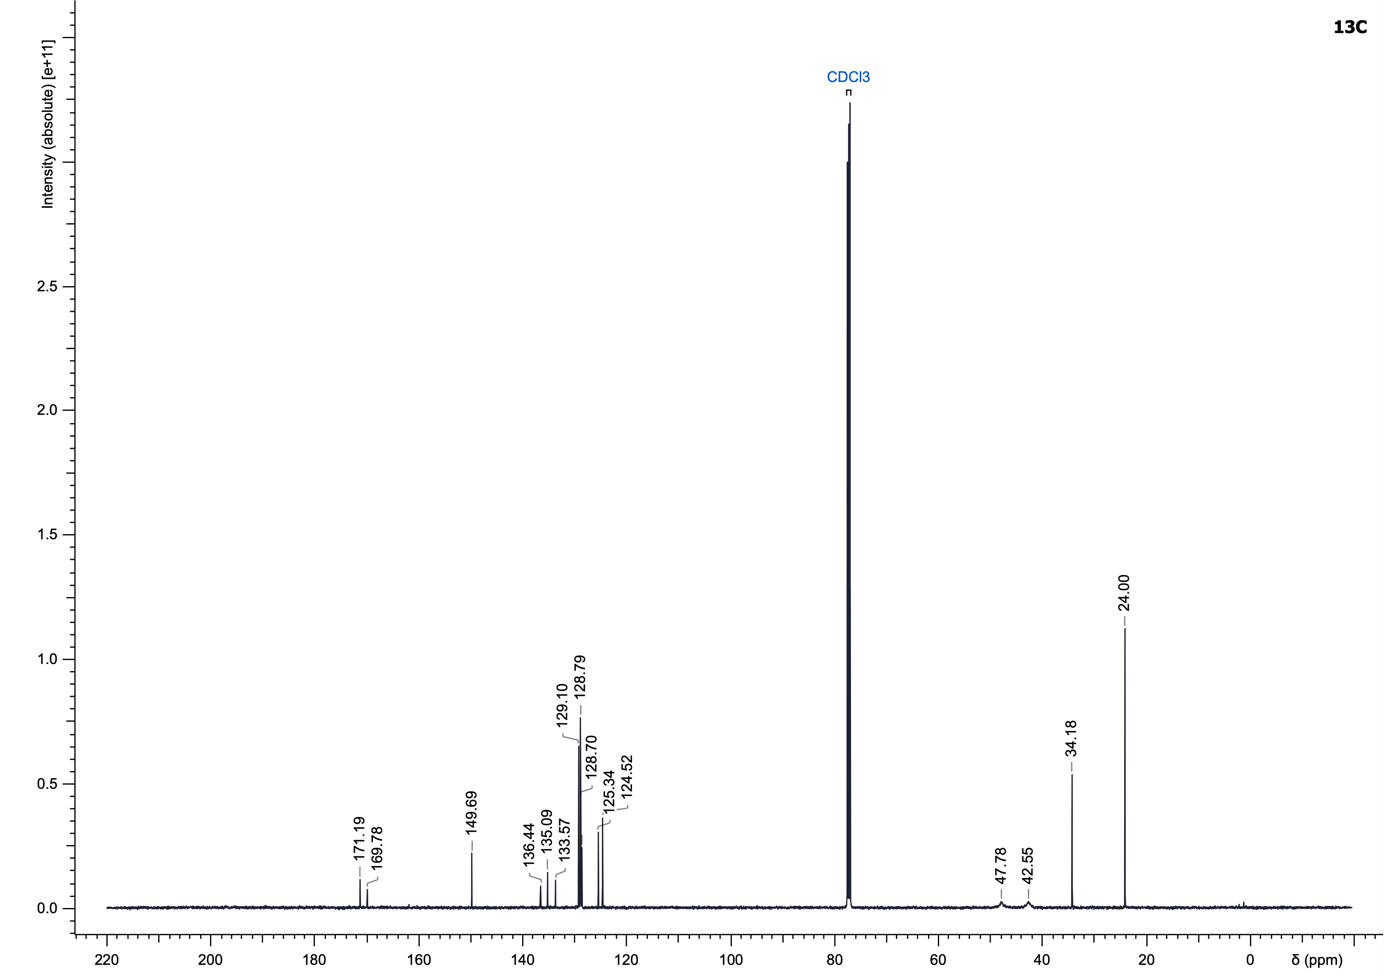


1-(4-(4-Chlorobenzoyl)piperazin-1-yl)-4-phenylbutan-1-one (32)

Compound **32** was synthesized according to the **General Procedure E** using 4-phenylbutanoic acid and (4-chlorophenyl)(piperazin-1-yl)methanone (267.04 µmol) as starting materials and purified using cyclohexane/ethyl acetate (25 to 100% ethyl acetate) to yield a colourless gel (35.7 mg, 36%).

**LC–MS** (ESI): tR = 3.45 min; 96% purity (UV at 254 nm);

**1H NMR** (500 MHz, CDCl3): *δ* 7.43–7.39 (m, 2H), 7.37–7.33 (m, 2H), 7.30–7.27 (m, 2H), 7.22–7.16 (m, 3H), 3.61 (br s, 4H), 3.43 (br s, 4H), 2.69 (t, *J* = 7.4 Hz, 2H), 2.34 (br s, 2H), 1.99 (quint, *J* = 7.5 Hz, 2H);

**13C NMR** (126 MHz, CDCl3): *δ* 171.6, 169.7, 141.6, 136.4, 133.6, 129.1 (2C), 128.8 (2C), 128.61 (2C), 128.58 (2C), 126.2, 47.8, 45.4, 42.6, 41.8, 35.3, 32.4, 26.6;

**HRMS** (ESI+) *m*/*z*: [M+H]+ calculated for C21H23ClN2O2, 371.1521; found, 371.1522.


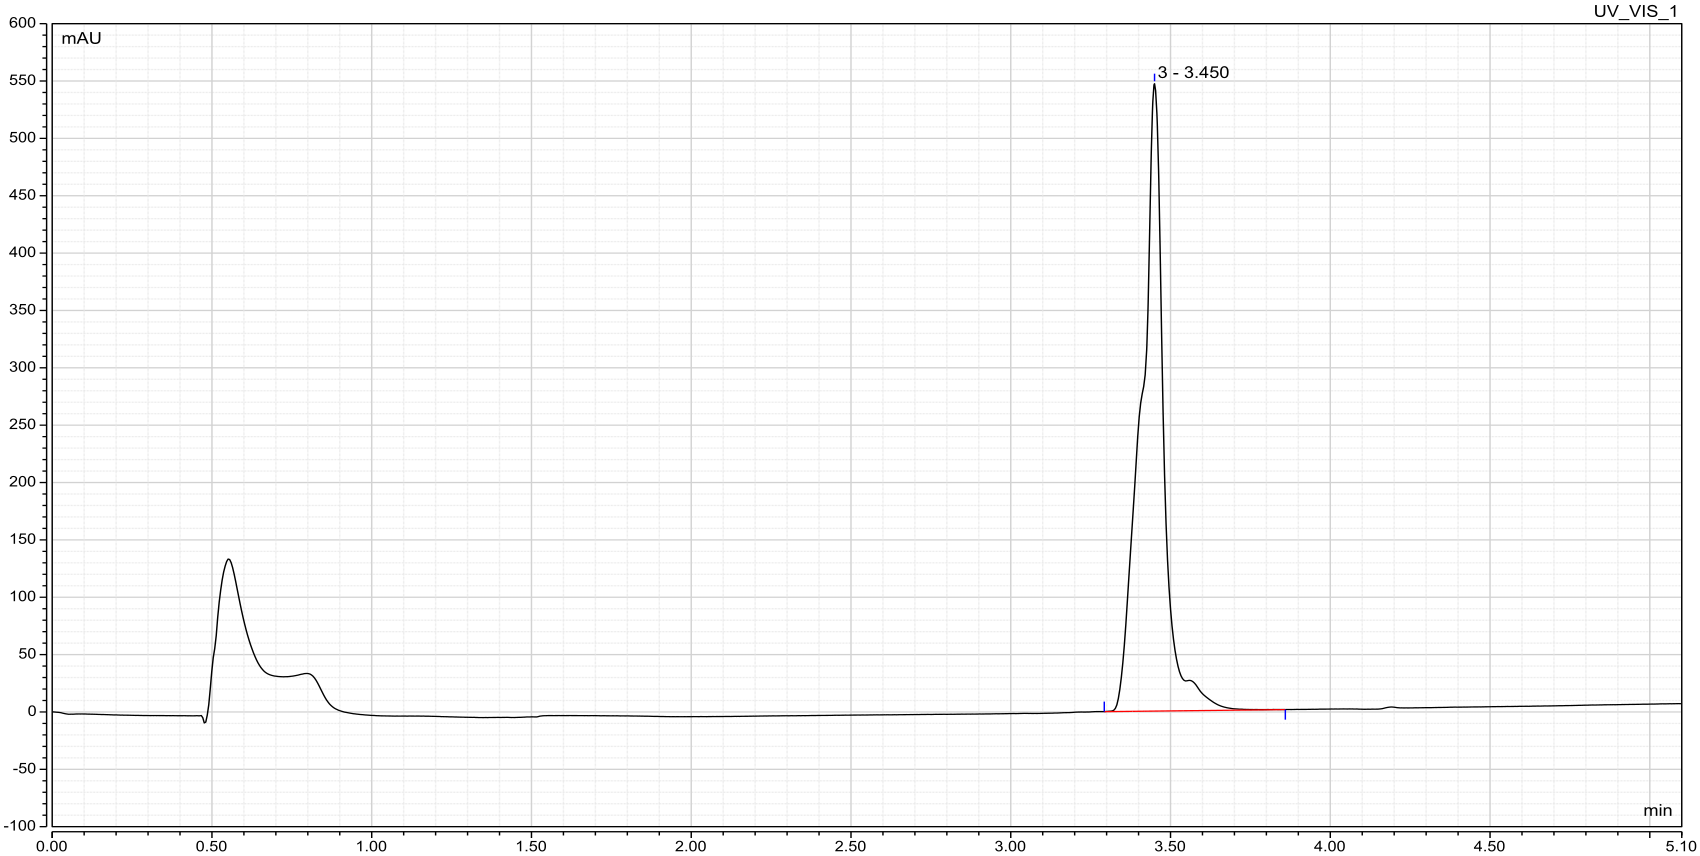


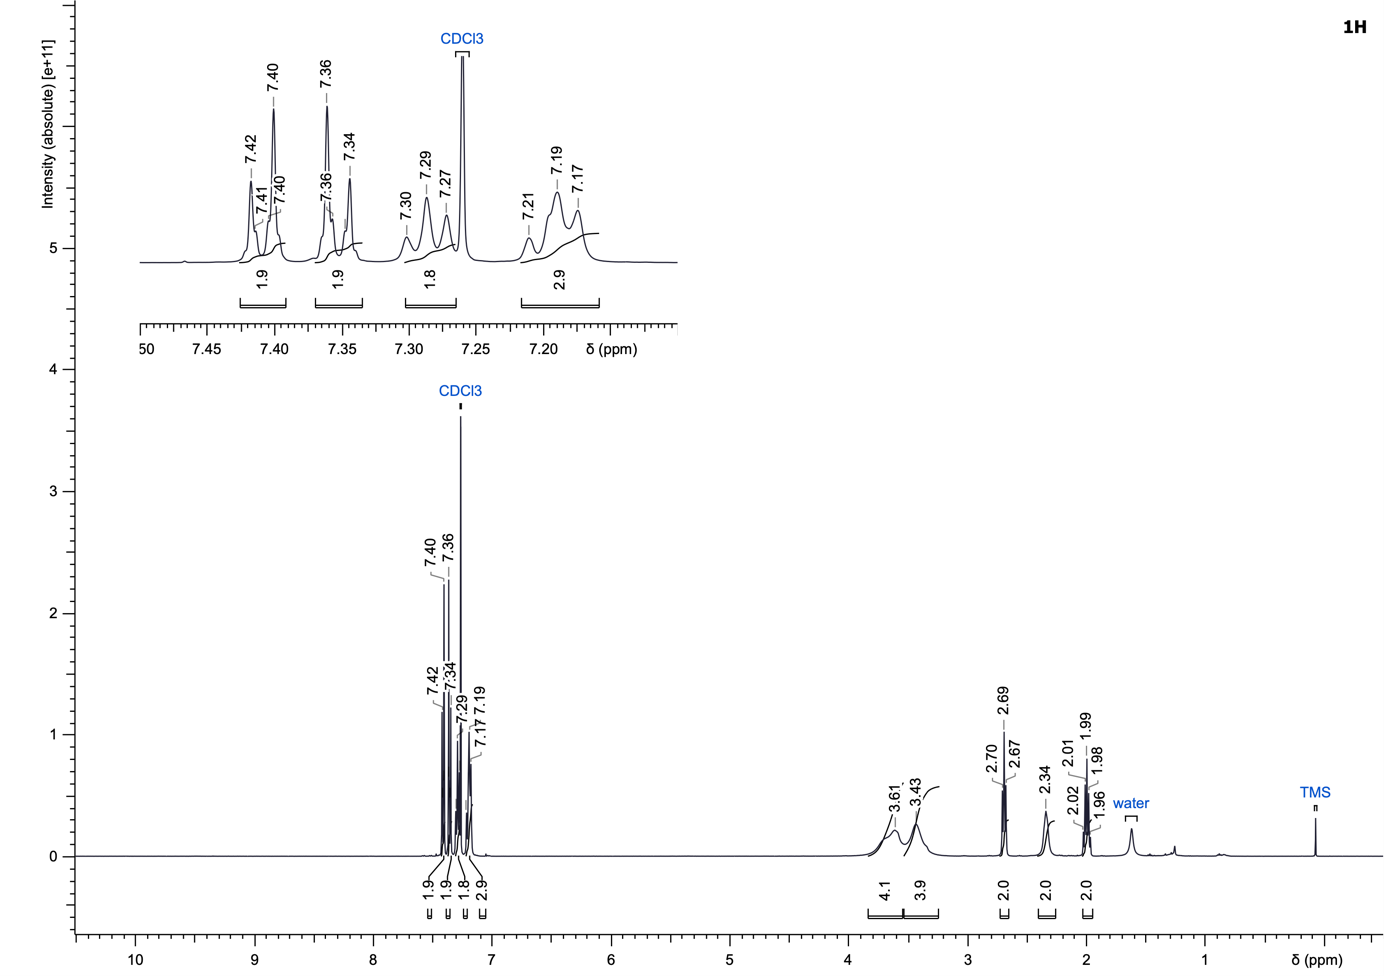


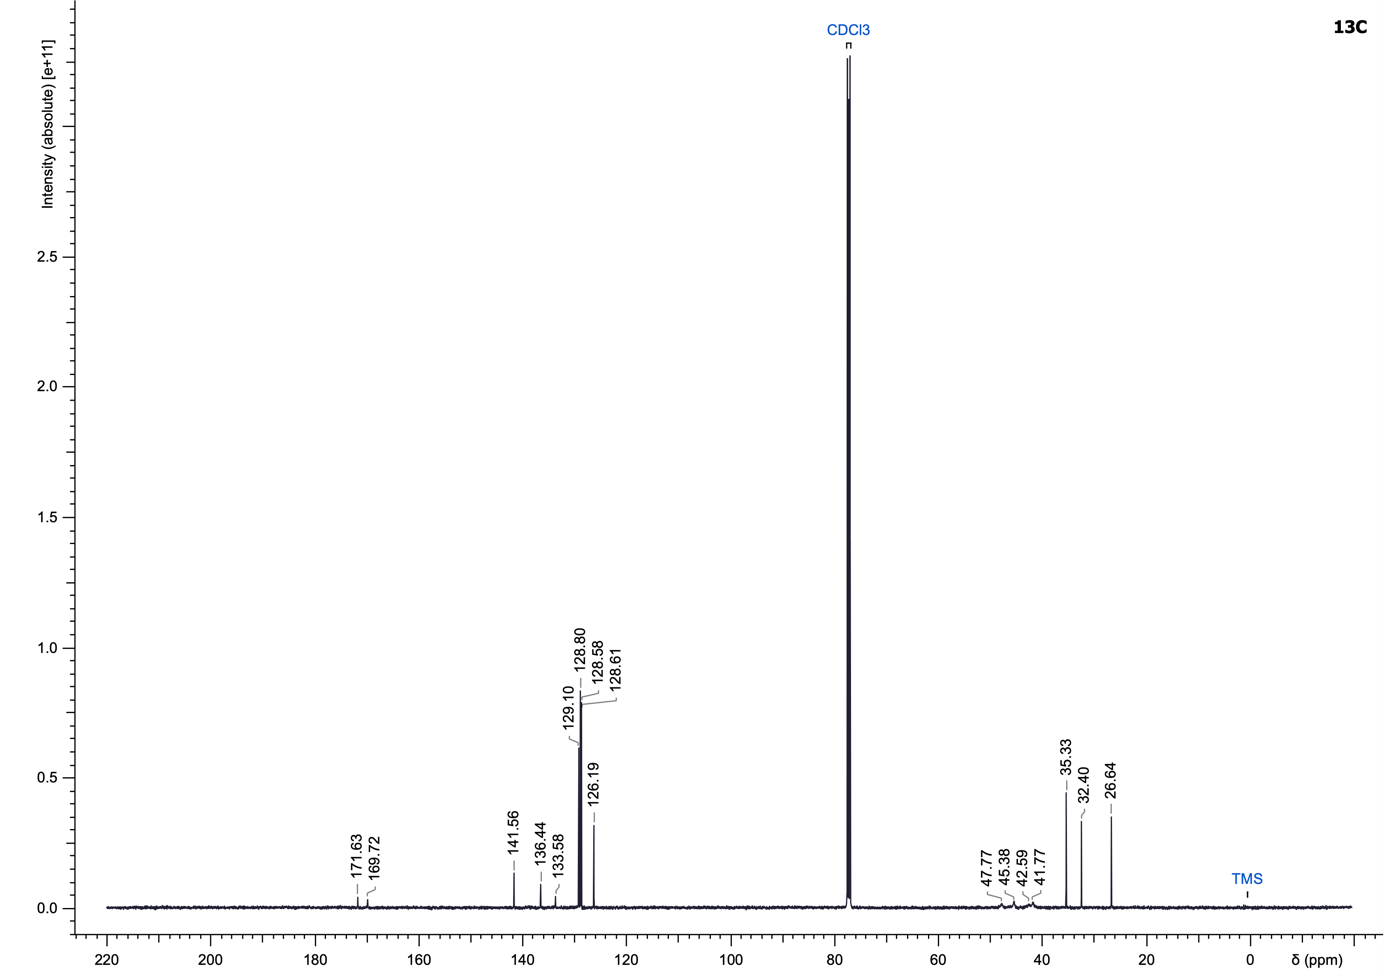


(*E*)-1-(4-(4-Chlorobenzoyl)piperazin-1-yl)-3-(3-hydroxyphenyl)prop-2-en-1-one (33)

Compound **33** was synthesized according to the **General Procedure E** using (*E*)-3-(3-hydroxyphenyl)acrylic acid and (4-chlorophenyl)(piperazin-1-yl)methanone (356.05 µmol) as starting materials and purified using dichloromethane/methanol (2 to 10% methanol) to yield a white gel (13.0 mg, 10%).

**LC–MS** (ESI): tR = 2.94 min; > 99% purity (UV at 254 nm);

**1H NMR** (500 MHz, DMSO-*d*6): *δ* 9.53 (s, 1H), 7.56–7.51 (m, 2H), 7.51–7.39 (m, 3H), 7.26–7.16 (m, 2H), 7.13 (br s, 1H), 7.06 (br s, 1H), 6.79 (d, *J* = 7.5 Hz, 1H), 3.94–3.35 (m, 8H);

**13C NMR** (126 MHz, DMSO-*d*6): *δ* 168.2, 164.7, 157.3, 142.1, 136.4, 134.5, 134.4, 129.7, 129.1 (2C), 128.6 (2C), 119.0, 117.8, 116.8, 114.5, 47.4, 47.0, 44.9, 41.7;

**HRMS** (ESI+) *m*/*z*: [M+H]+ calculated for C20H19ClN2O3, 371.1157; found, 371.1158.


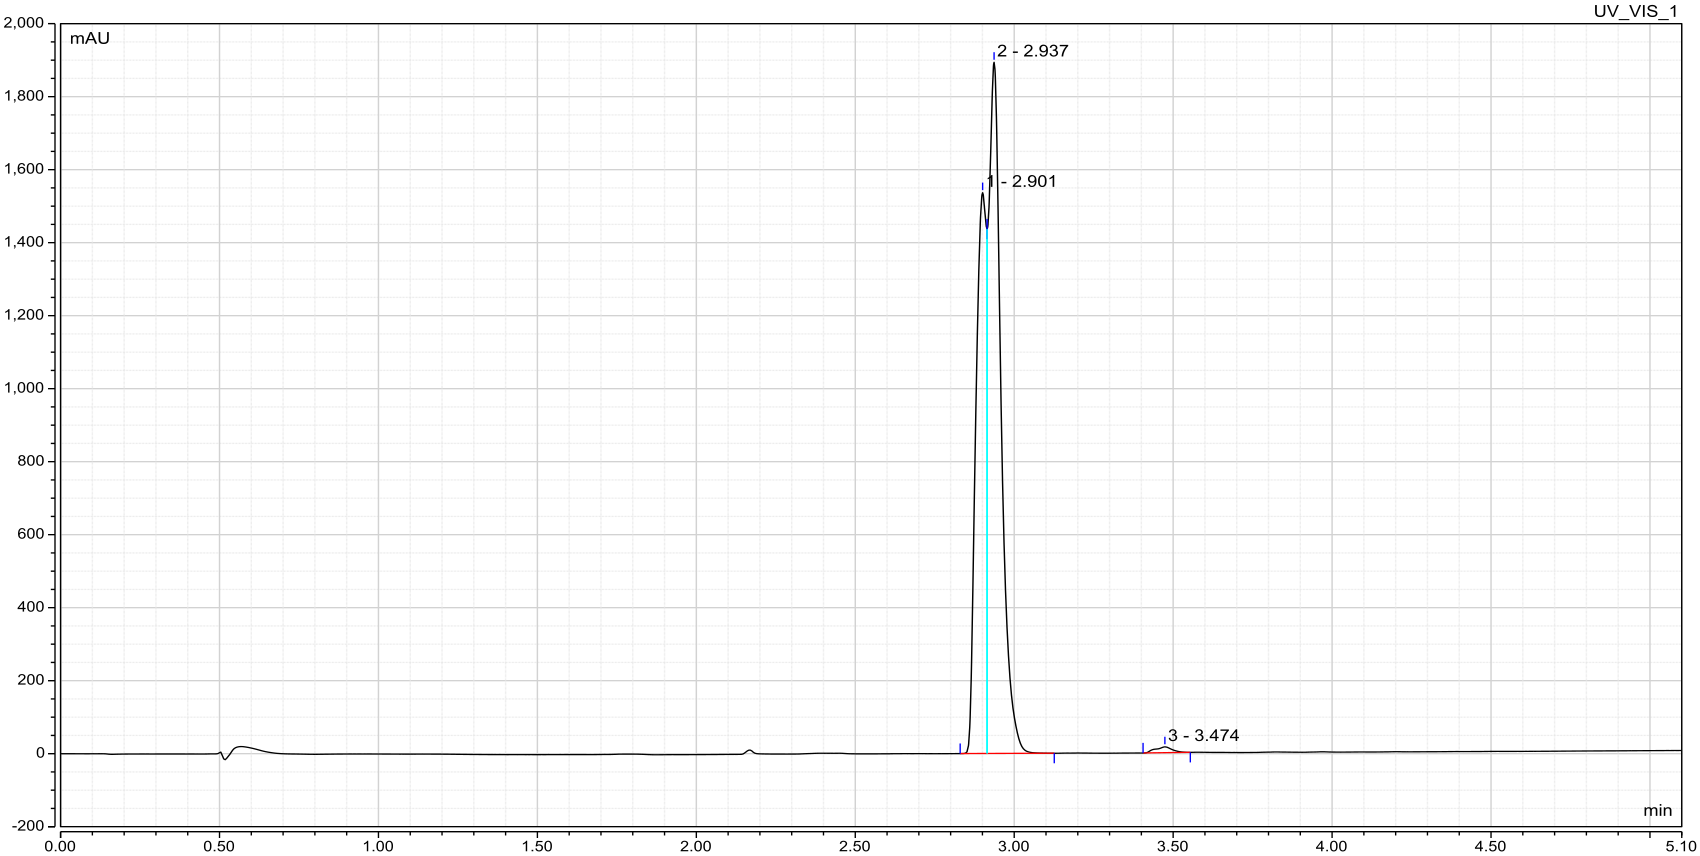


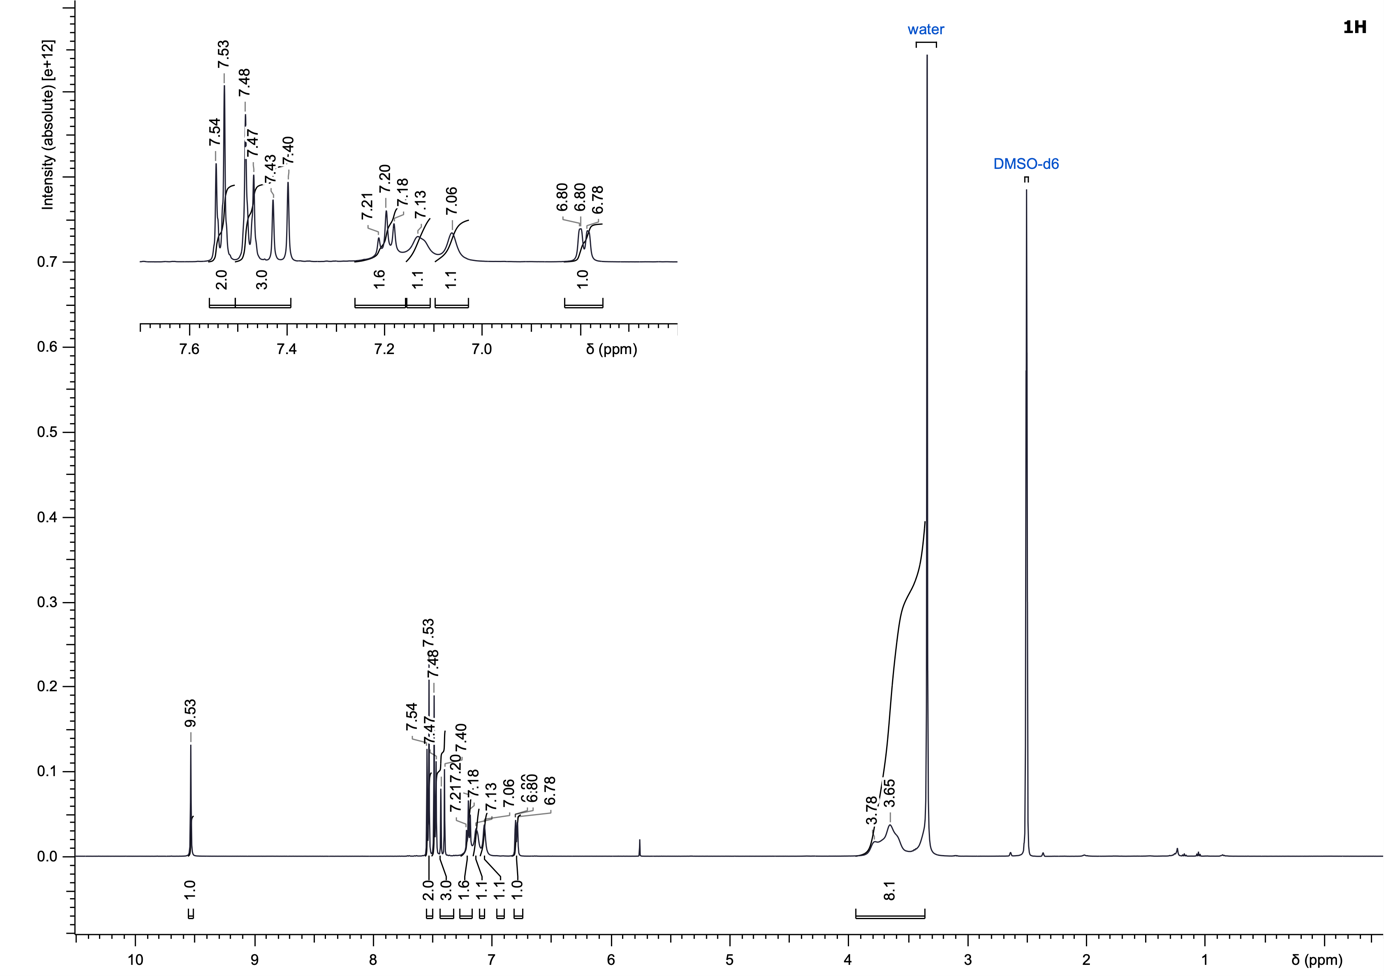


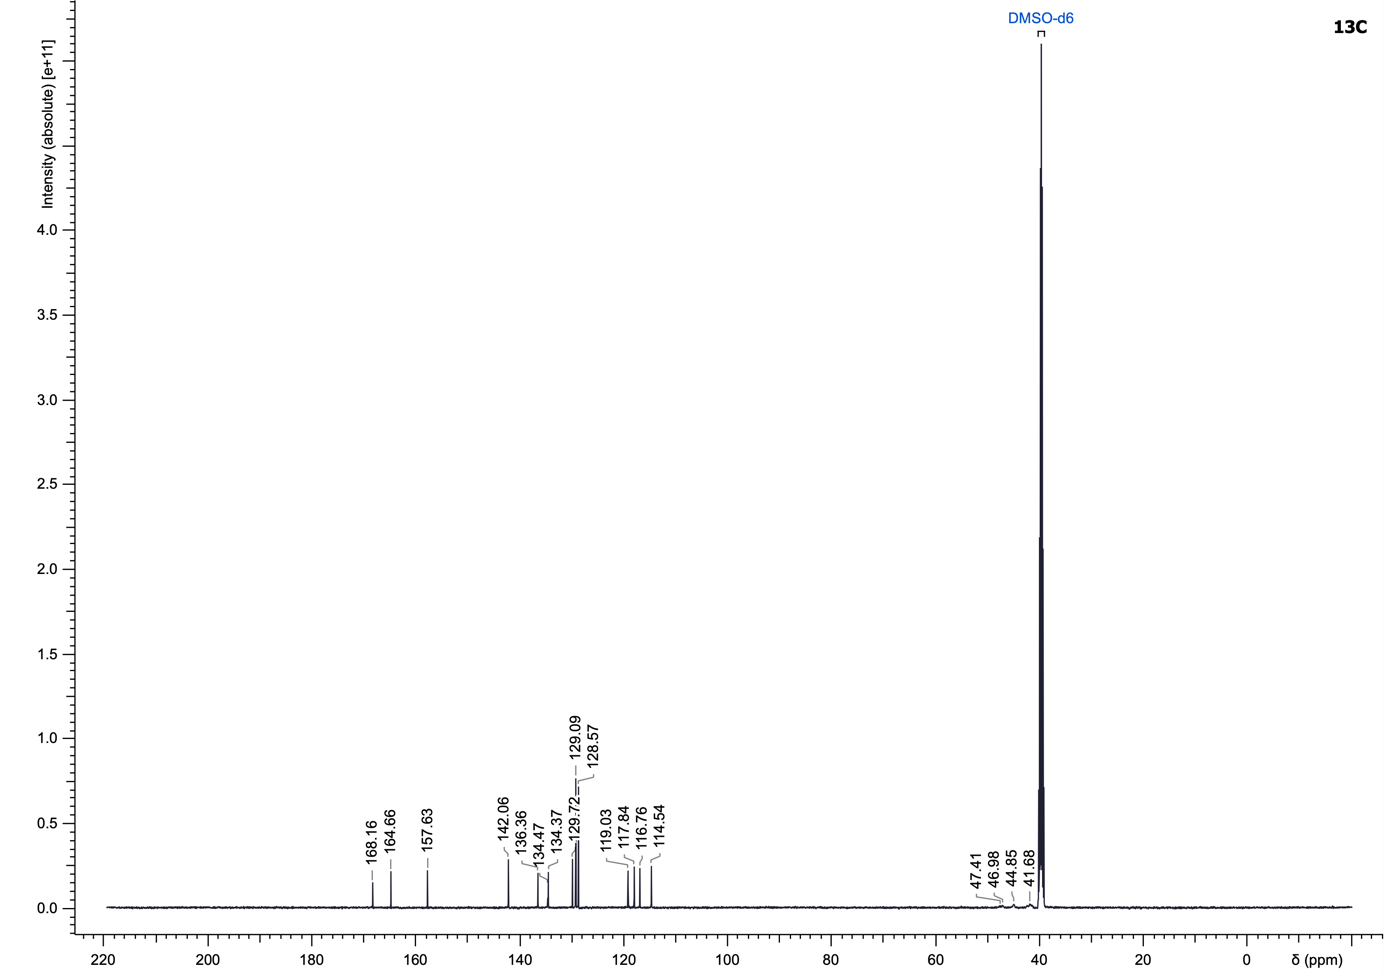


*N*-(2-(4-(4-Chlorobenzoyl)piperazin-1-yl)-2-oxoethyl)benzamide (34)

Compound **34** was synthesized according to the **General Procedure E** using benzoylglycine and (4-chlorophenyl)(piperazin-1-yl)methanone (311.54 µmol) as starting materials and purified using dichloromethane/methanol (1 to 6% methanol) to yield a colourless gel (77.0 mg, 64%).

**LC–MS** (ESI): tR = 2.80 min; > 99% purity (UV at 254 nm);

**1H NMR** (500 MHz, CDCl3): *δ* 7.83 (d, *J* = 7.5 Hz, 2H), 7.55–7.49 (m, 1H), 7.47–7.41 (m, 4H), 7.39–7.37 (m, 2H), 4.29 (br s, 2H), 3.70 (br s, 4H), 3.53 (br s, 4H);

**13C NMR** (126 MHz, CDCl3): *δ* 169.8, 167.4, 167.1, 136.7, 133.9, 133.3, 132.0, 129.2 (2C), 128.83 (2C), 128.77 (2C), 127.2 (2C), 44.6 (2C), 42.2 (2C), 41.9;

**HRMS** (ESI+) *m*/*z*: [M+H]+ calculated for C20H20ClN3O3, 386.1266; found, 386.1266.


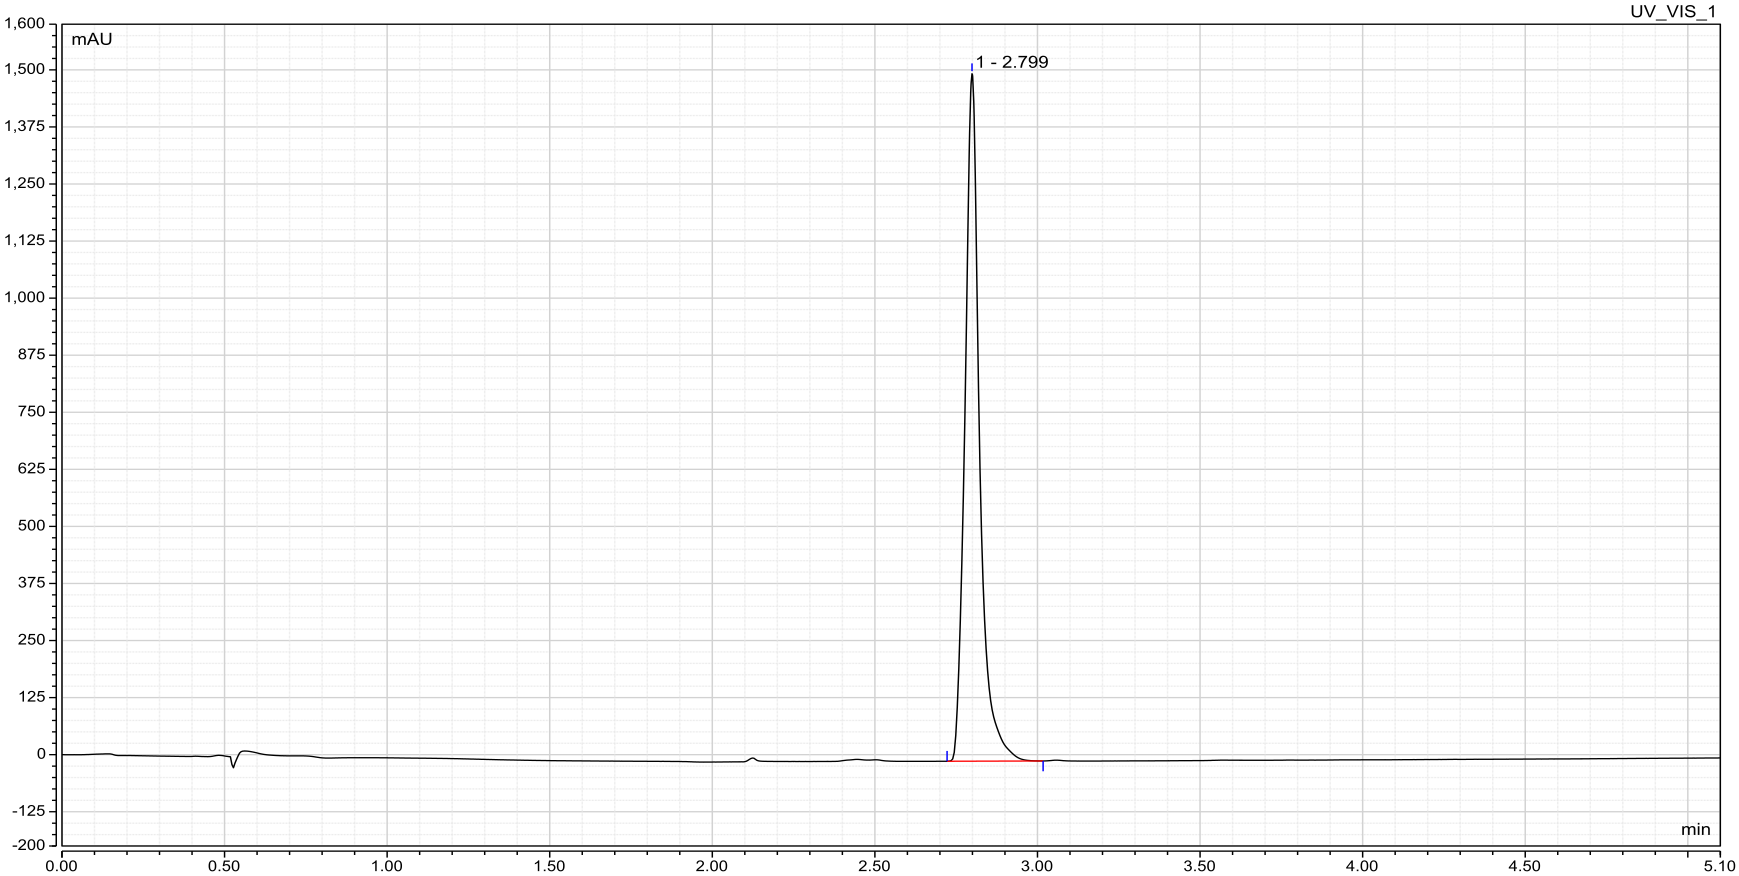


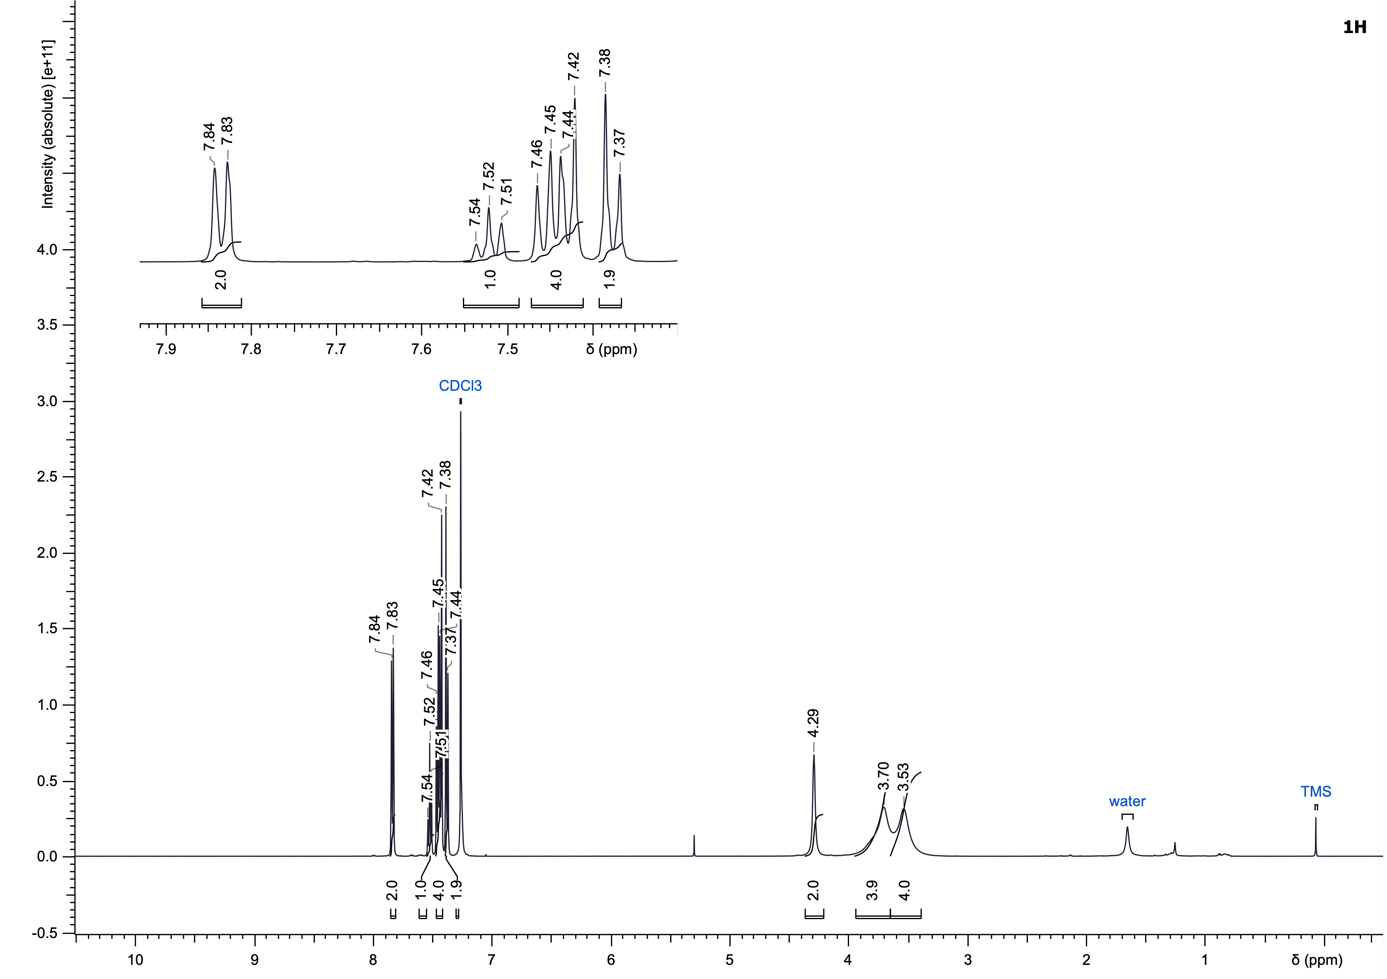


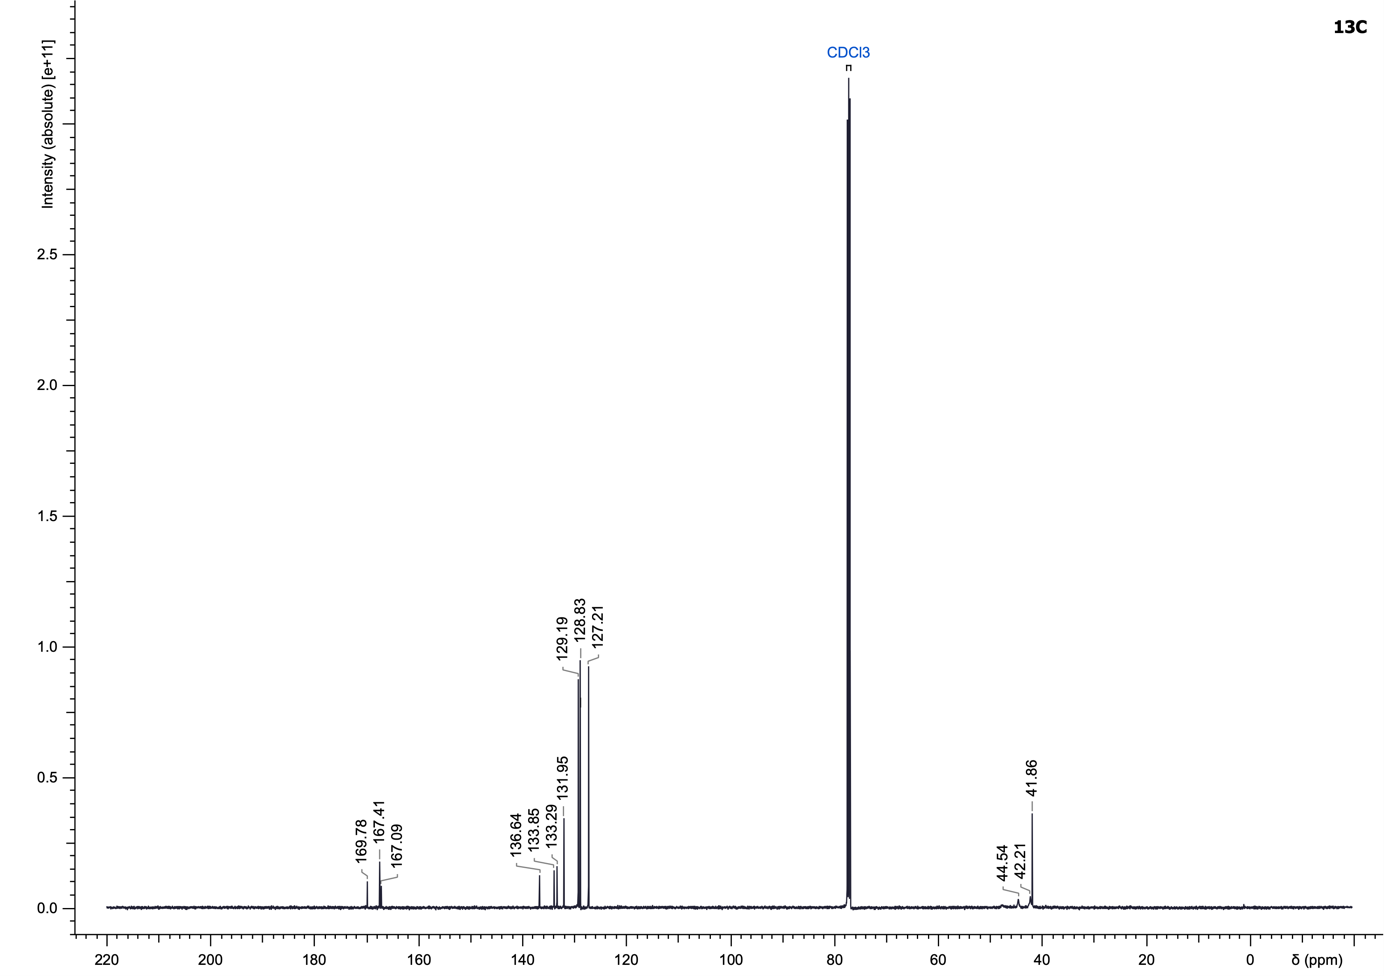


*tert*-Butyl (*S*)-(1-(4-(4-chlorobenzoyl)piperazin-1-yl)-1-oxo-4-phenylbutan-2-yl)carbamate (35)

Compound **35** was synthesized according to the **General Procedure E** using (*S*)-2-((*tert*-butoxycarbonyl)amino)-4-phenylbutanoic acid and (4-chlorophenyl)(piperazin-1-yl)methanone (351.60 µmol) as starting materials and purified using cyclohexane/ethyl acetate + 1% triethylamine (10 to 80% ethyl acetate) to yield a white solid (130.1 mg, 76%).

**LC–MS** (ESI): tR = 3.79 min; > 99% purity (UV at 254 nm);

**1H NMR** (500 MHz, CDCl3): *δ* 7.44–7.38 (m, 2H), 7.37–7.27 (m, 4H), 7.24–7.16 (m, 3H), 5.36 (br d, *J* = 8.7 Hz, 1H), 4.58 (br s, 1H), 4.06–2.98 (m, 8H), 2.69 (br s, 2H), 2.00–1.81 (m, 2H), 1.45 (s, 9H);

**13C NMR** (126 MHz, CDCl3): *δ* 171.2, 169.7, 155.7, 140.9, 136.5, 133.4, 129.1 (2C), 128.8 (2C), 128.66 (2C), 128.73 (2C), 126.5, 80.1, 49.4, 45.4 (2C), 42.0 (2C), 35.6, 31.6, 28.5 (3C);

**HRMS** (ESI+) *m*/*z*: [M+H]+ calculated for C26H32ClN3O4, 486.2154 found, 486.2151.


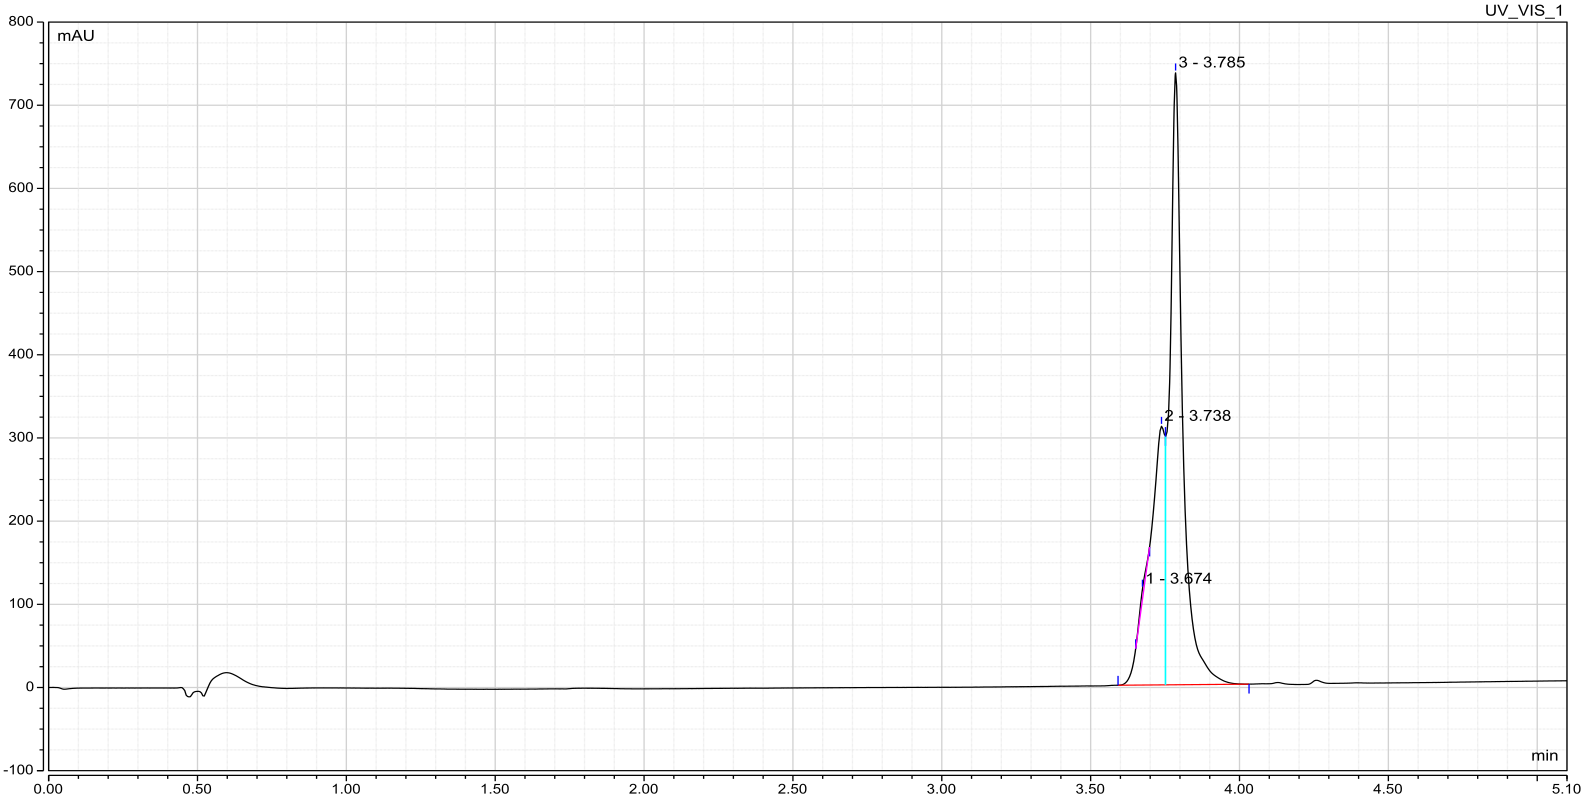


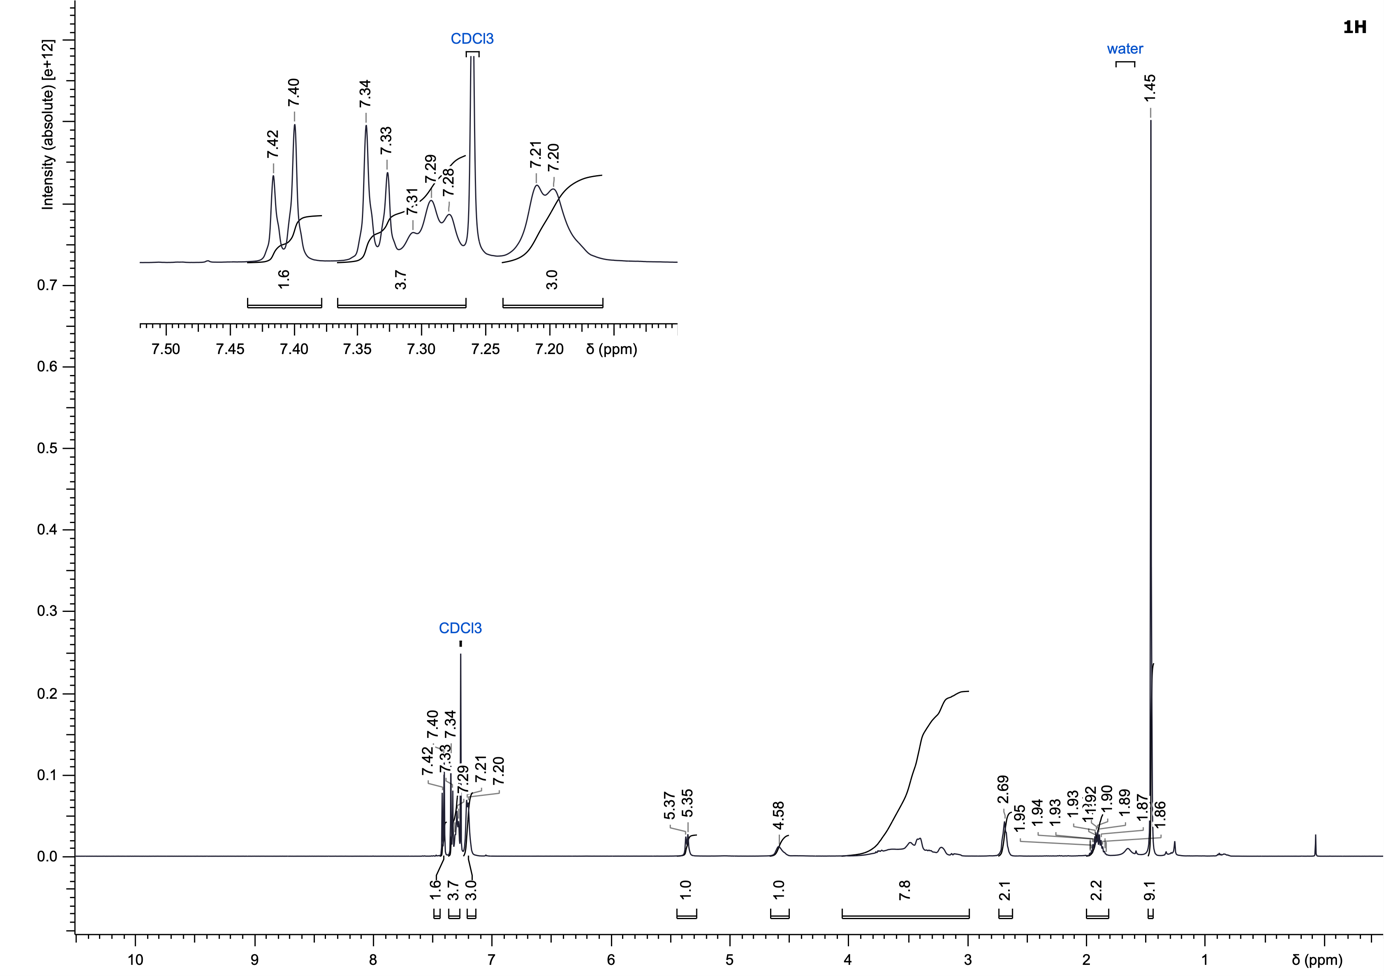


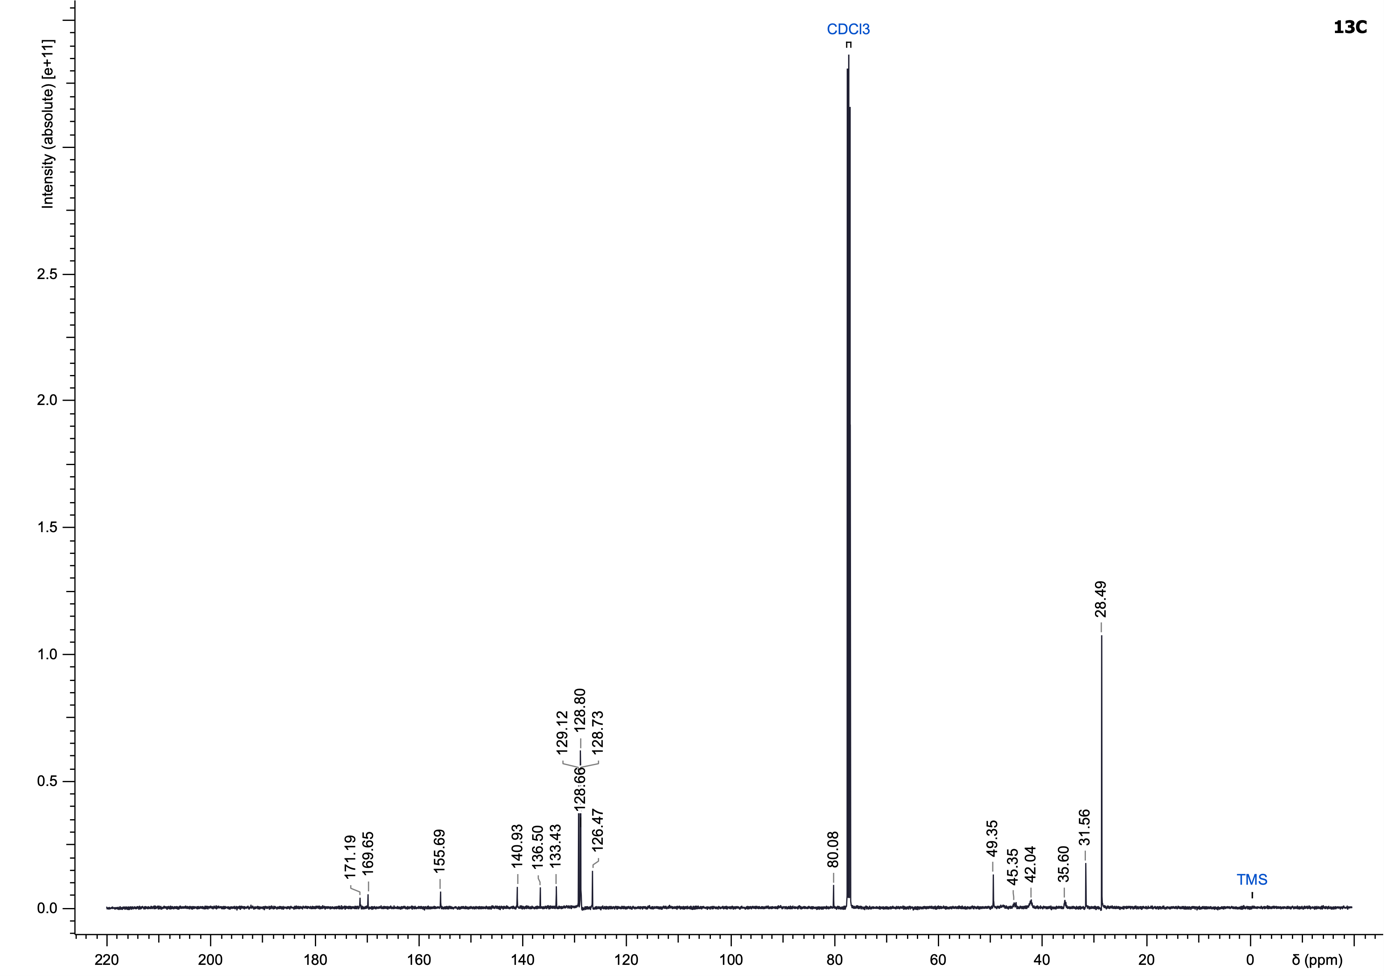


(*S*)-2-Amino-1-(4-(4-chlorobenzoyl)piperazin-1-yl)-4-phenylbutan-1-one (36)

To a solution of (*S*)-(1-(4-(4-chlorobenzoyl)piperazin-1-yl)-1-oxo-4-phenylbutan-2-yl)carbamate (205.80 µmol, 1.0 eq) in DCM (0.2 M) at 0 °C was added 2,2,2-trifluoroacetic acid (2.0 eq). The reaction mixture was allowed to warm to room temperature and stirred overnight. Upon completion, the reaction mixture was diluted with dichloromethane (10 mL), washed with saturated NaOH (3 × 15 mL), dried over MgSO4 and concentrated under reduced pressure. The crude product was purified by normal-phase flash chromatography on silica gel using a gradient of dichloromethane/methanol (1 to 8% methanol) to yield the desired amide **36** as a white solid (45.9 mg, 64%).

**LC–MS** (ESI): tR = 2.48 min; > 99% purity (UV at 254 nm);

**1H NMR** (500 MHz, CDCl3): *δ* (d, *J* = 8.8 Hz, 2H), 7.32 (d, *J* = 8.7 Hz, 2H), 7.30–7.27 (m, 1H), 7.26–7.23 (m, 1H), 7.23–7.15 (m, 3H), 4.85 (br s, 2H), 4.03 (br dd, *J* = 7.5, 4.4 Hz, 1H), 3.81–3.02 (m, 8H), 2.78 (br d, *J* = 6.0 Hz, 2H), 2.07–1.91 (m, 2H);

**13C NMR** (126 MHz, CDCl3): *δ* 170.7, 169.7, 140.2, 136.6, 133.3, 129.1 (2C), 128.9 (2C), 128.8 (2C), 128.6 (2C), 126.8, 50.1, 45.0 (2C), 42.4 (2C), 35.0, 31.2;

**HRMS** (ESI+) *m*/*z*: [M+H]+ calculated for C21H24ClN3O2, 386.1630 found, 386.1632.


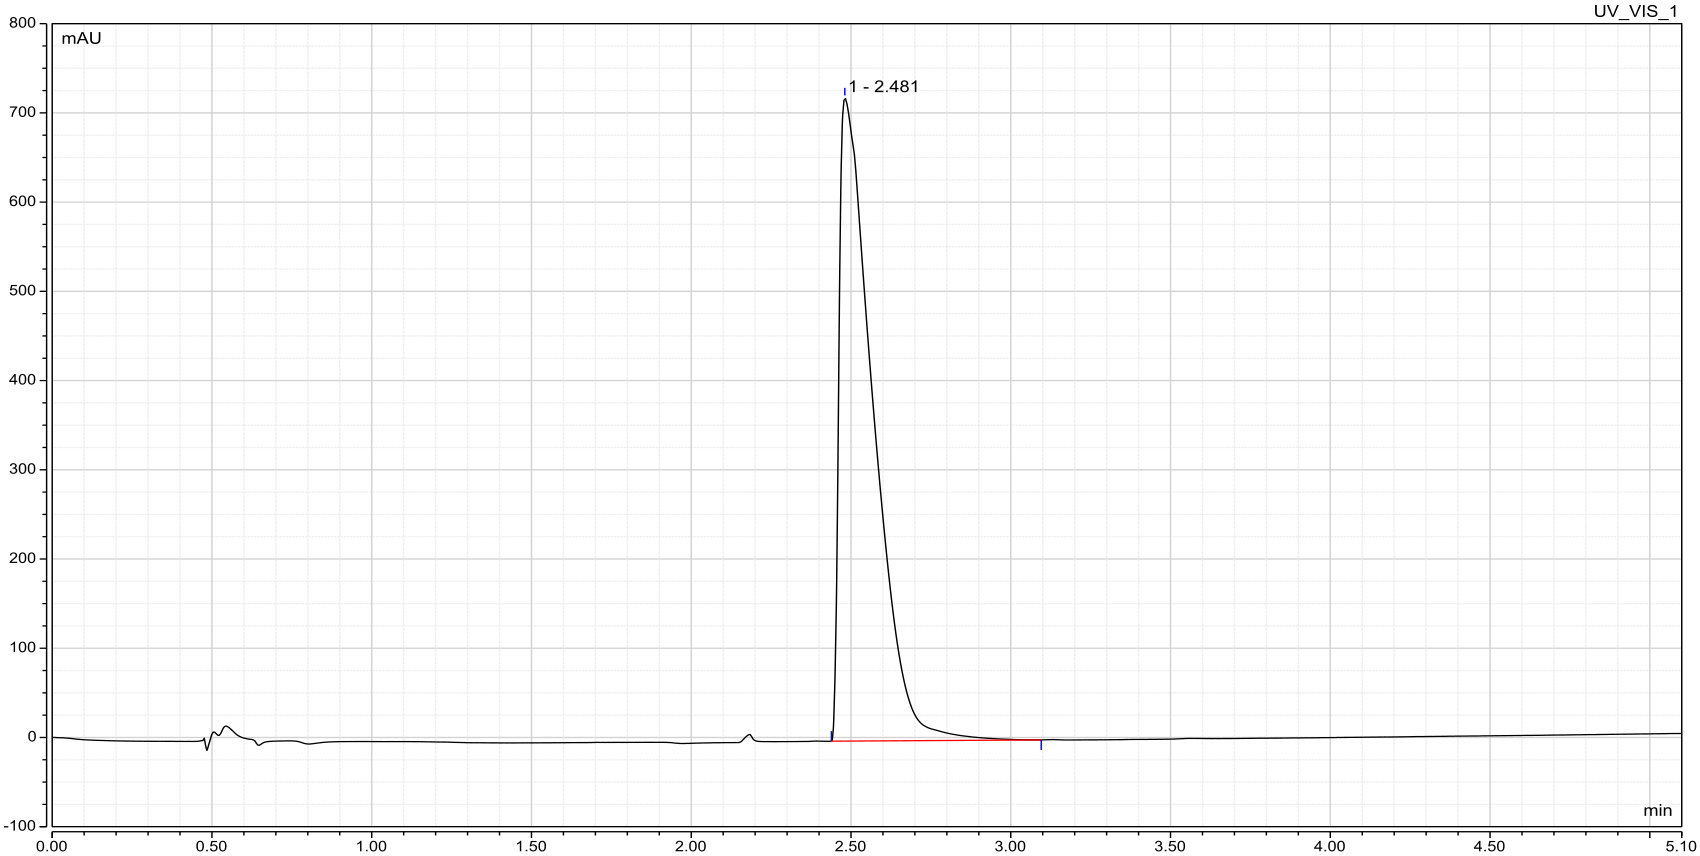


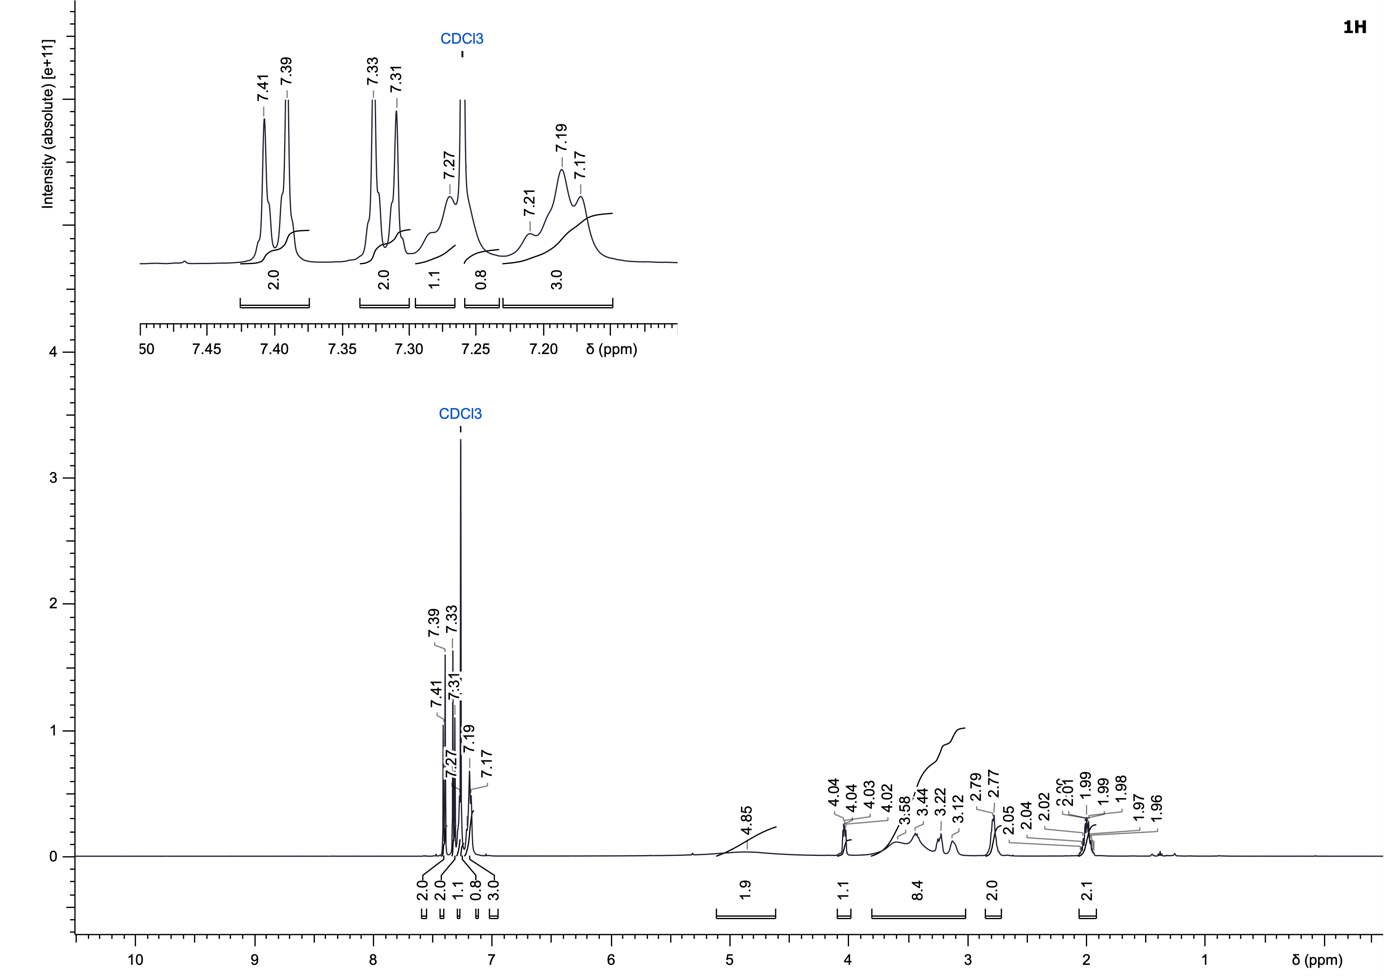


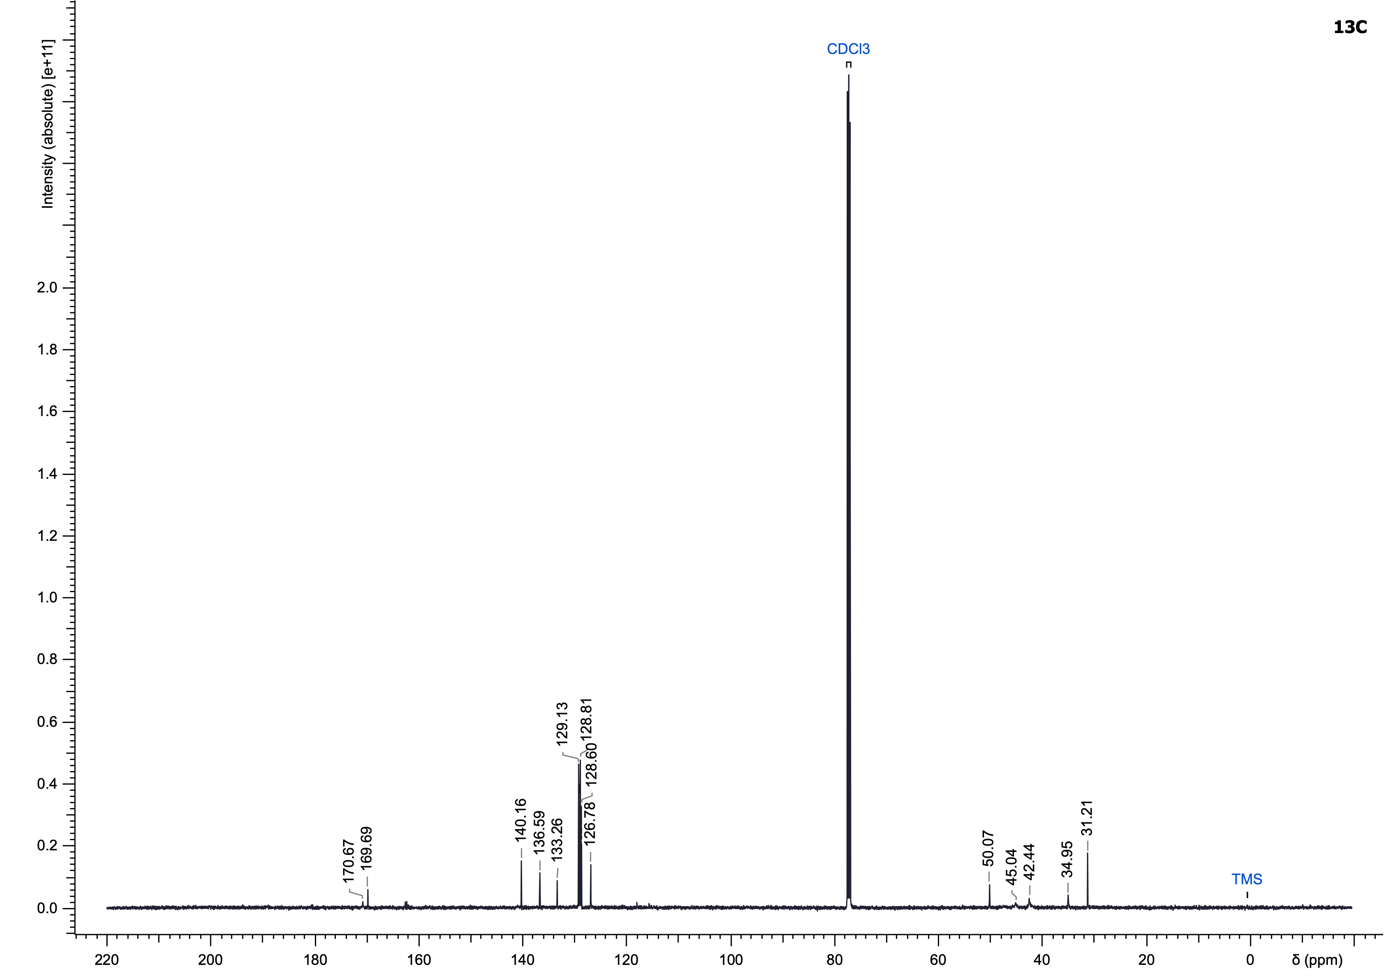


Benzyl 4-(4-chlorobenzoyl)piperazine-1-carboxylate (37)

Compound **37** was synthesized according to the **General Procedure F** using benzyl carbonochloridate and (4-chlorophenyl)(piperazin-1-yl)methanone (140.19 µmol) as starting materials and purified using cyclohexane/ethyl acetate (5 to 80% ethyl acetate) to yield a white solid (31.6 mg, 63%).

**LC–MS** (ESI): tR = 3.53 min; > 99% purity (UV at 254 nm);

**1H NMR** (500 MHz, CDCl3): *δ* 7.42–7.38 (m, 2H), 7.38–7.31 (m, 7H), 5.15 (s, 2H), 3.91–3.36 (m, 8H);

**13C NMR** (126 MHz, CDCl3): *δ* 169.7, 155.2, 136.4, 136.3, 133.7, 129.1 (2C), 128.8 (2C), 128.7 (2C), 128.4, 128.2 (2C), 67.7, 47.6, 44.0 (2C), 42.4;

**HRMS** (ESI+) *m*/*z*: [M+H]+ calculated for C19H19ClN2O3, 359.1157 found, 359.1160.


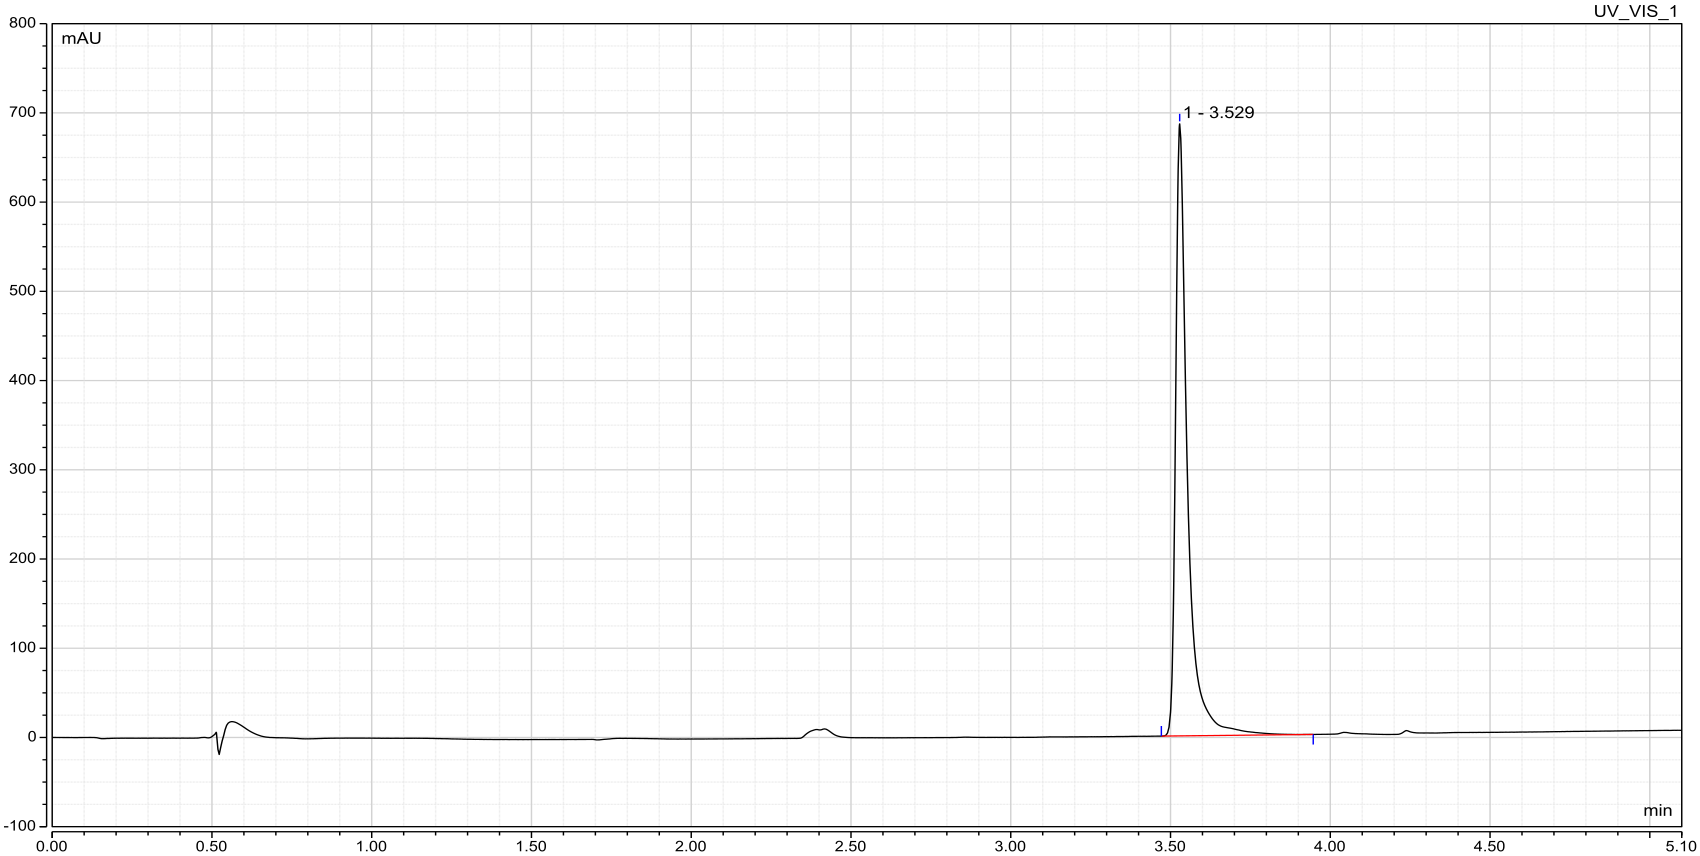


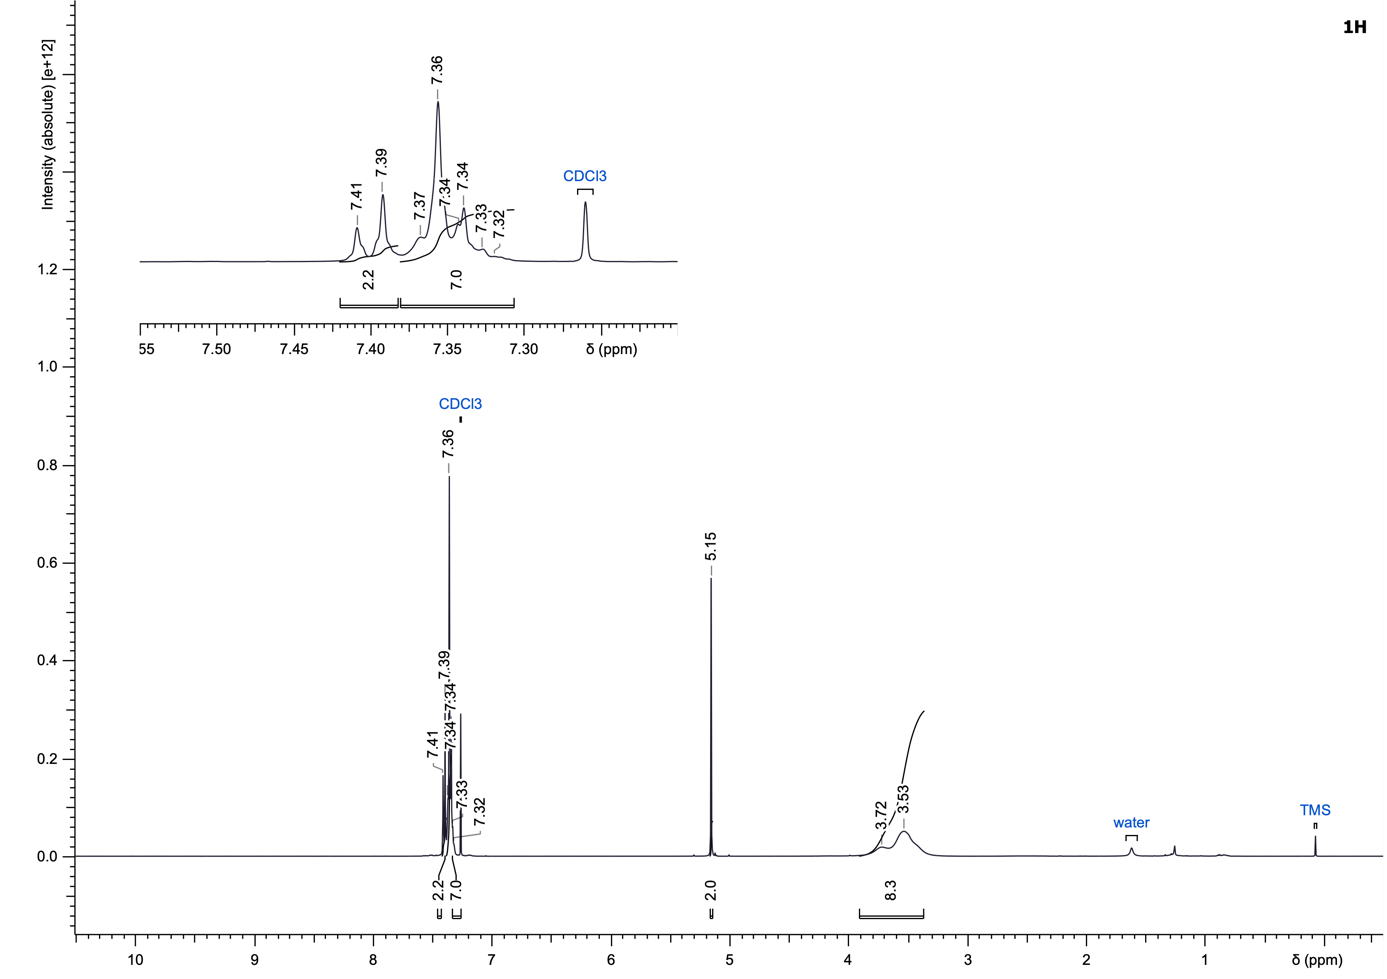


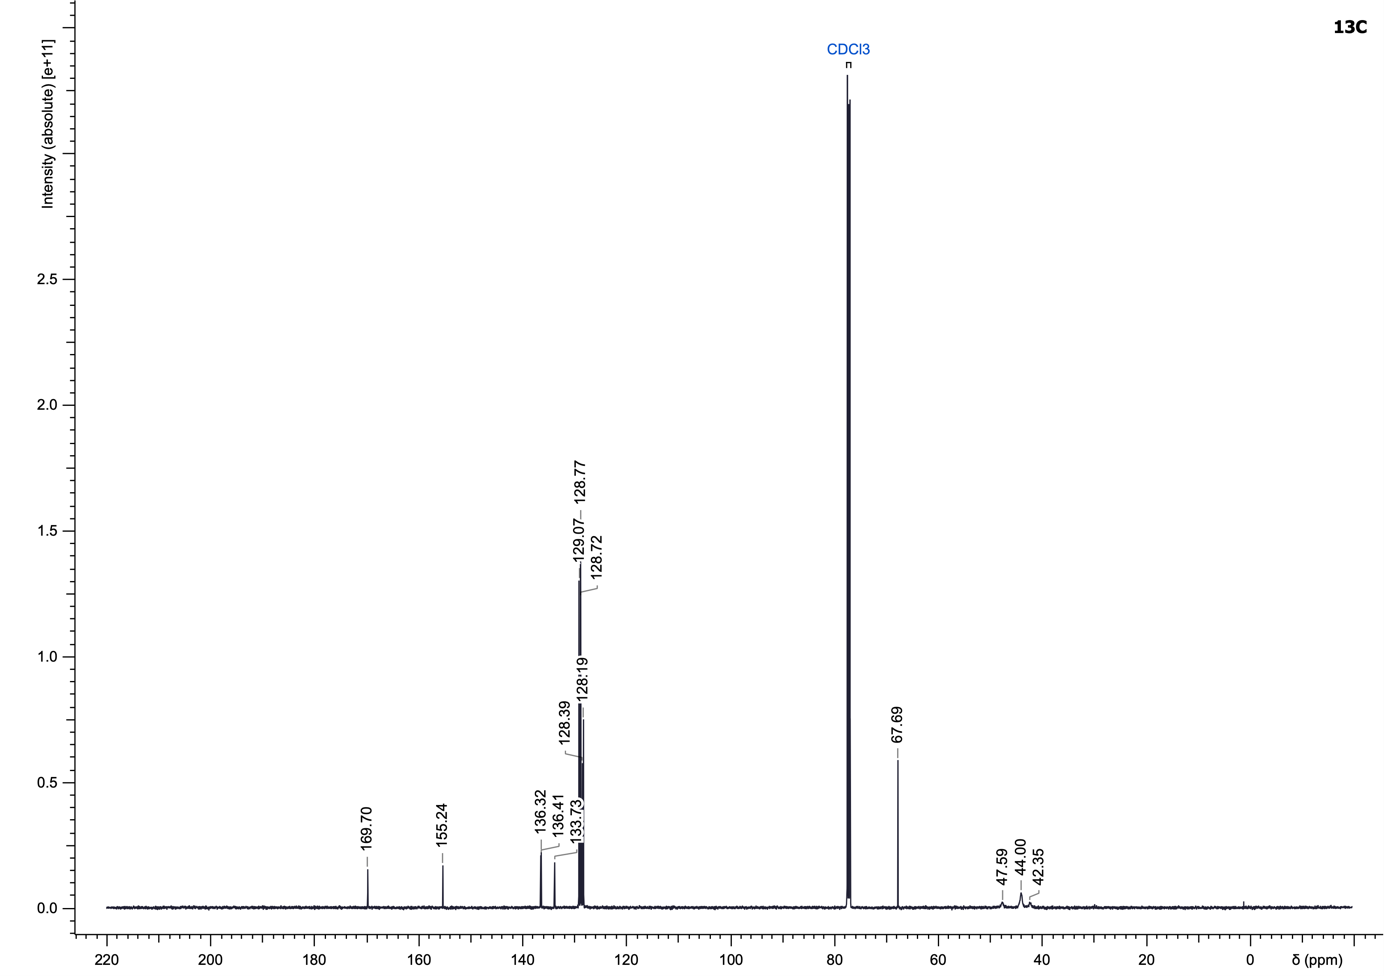


(9*H*-Fluoren-9-yl)methyl 4-(4-chlorobenzoyl)piperazine-1-carboxylate (38)

Compound **38** was synthesized according to the **General Procedure F** using (9*H*-fluoren-9-yl)methyl carbonochloridate and (4-chlorophenyl)(piperazin-1-yl)methanone (311.54 µmol) as starting materials and purified using cyclohexane/ethyl acetate (5 to 70% ethyl acetate) to yield a white solid (43.5 mg, 31%).

**LC–MS** (ESI): tR = 3.99 min; > 99% purity (UV at 254 nm);

**1H NMR** (500 MHz, CDCl3): *δ* 7.77 (br d, *J* = 7.5 Hz, 2H), 7.55 (br d, *J* = 7.5 Hz, 2H), 7.43–7.38 (m, 4H), 7.36–7.30 (m, 4H), 4.52 (d, *J* = 6.3 Hz, 2H), 4.24 (br t, *J* = 6.0 Hz, 1H), 3.77–3.23 (m, 8H);

**13C NMR** (126 MHz, CDCl3): *δ* 169.7, 155.1, 143.9 (2C), 141.5 (2C), 136.4, 133.7, 129.1 (2C), 128.8 (2C), 127.9 (2C), 127.2 (2C), 125.0 (2C), 120.2 (2C), 67.5, 47.5, 44.0 (2C), 42.2 (2C);

**HRMS** (ESI+) *m*/*z*: [M+H]+ calculated for C26H23ClN2O3, 447.1470 found, 447.1471.


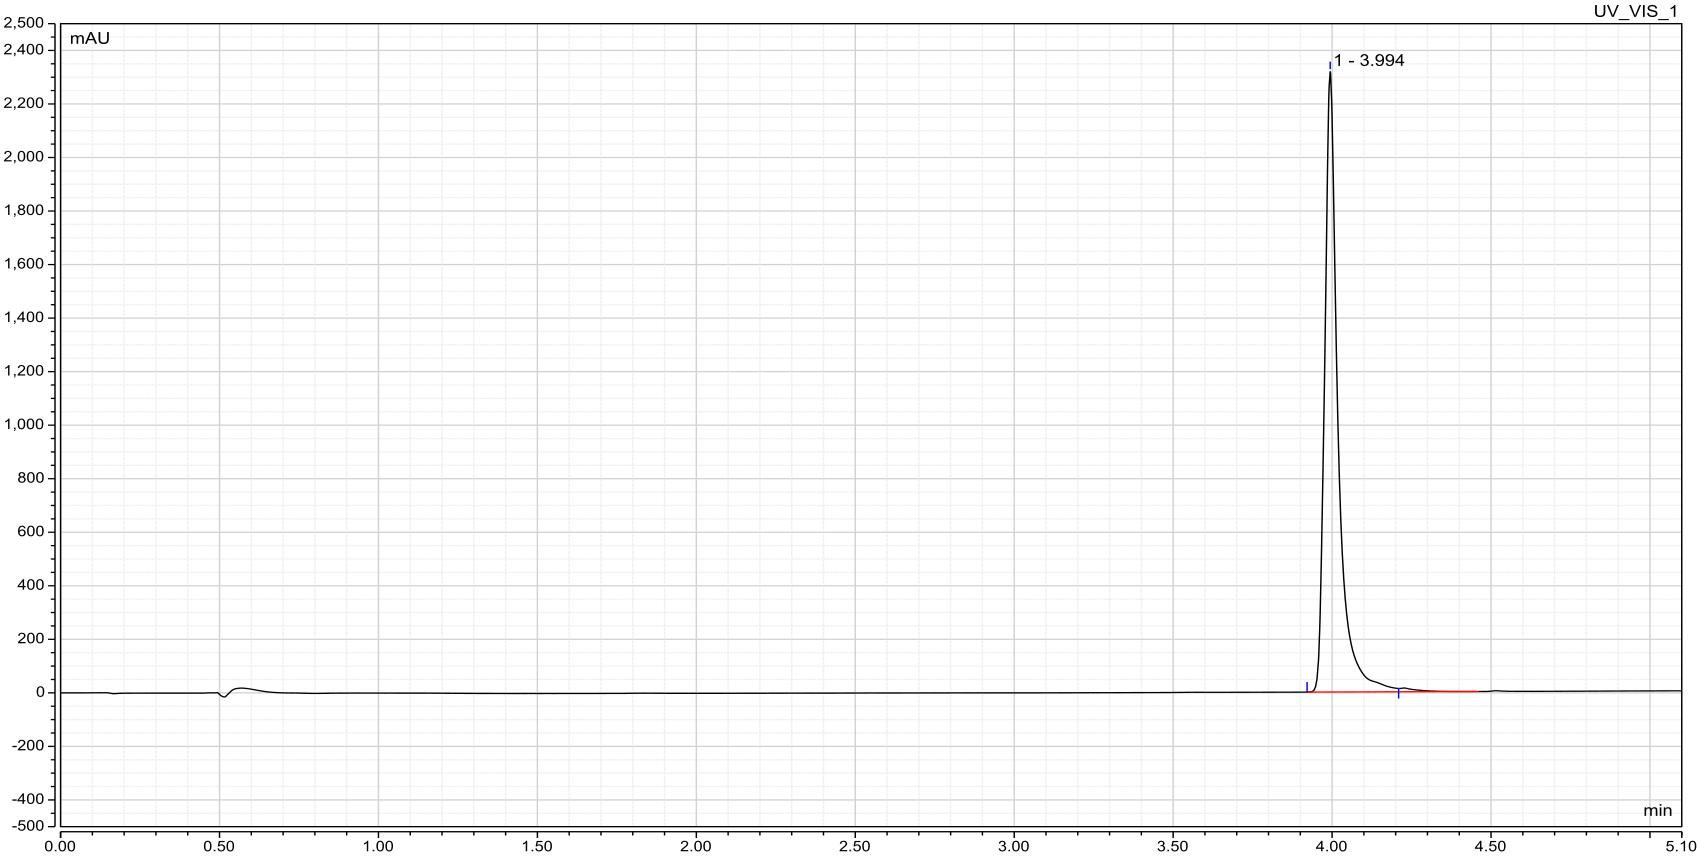


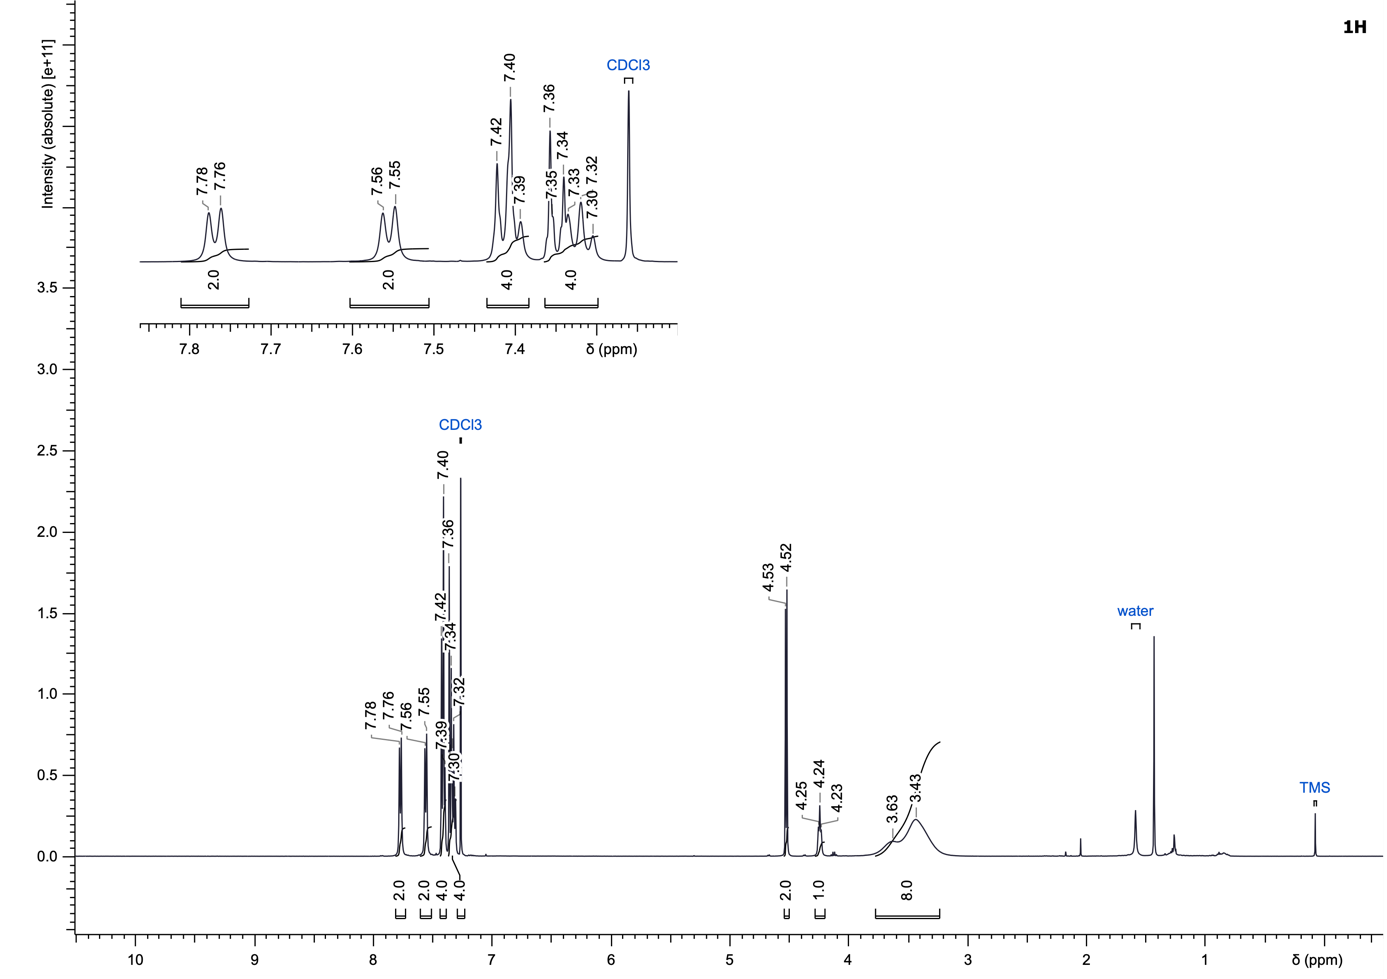


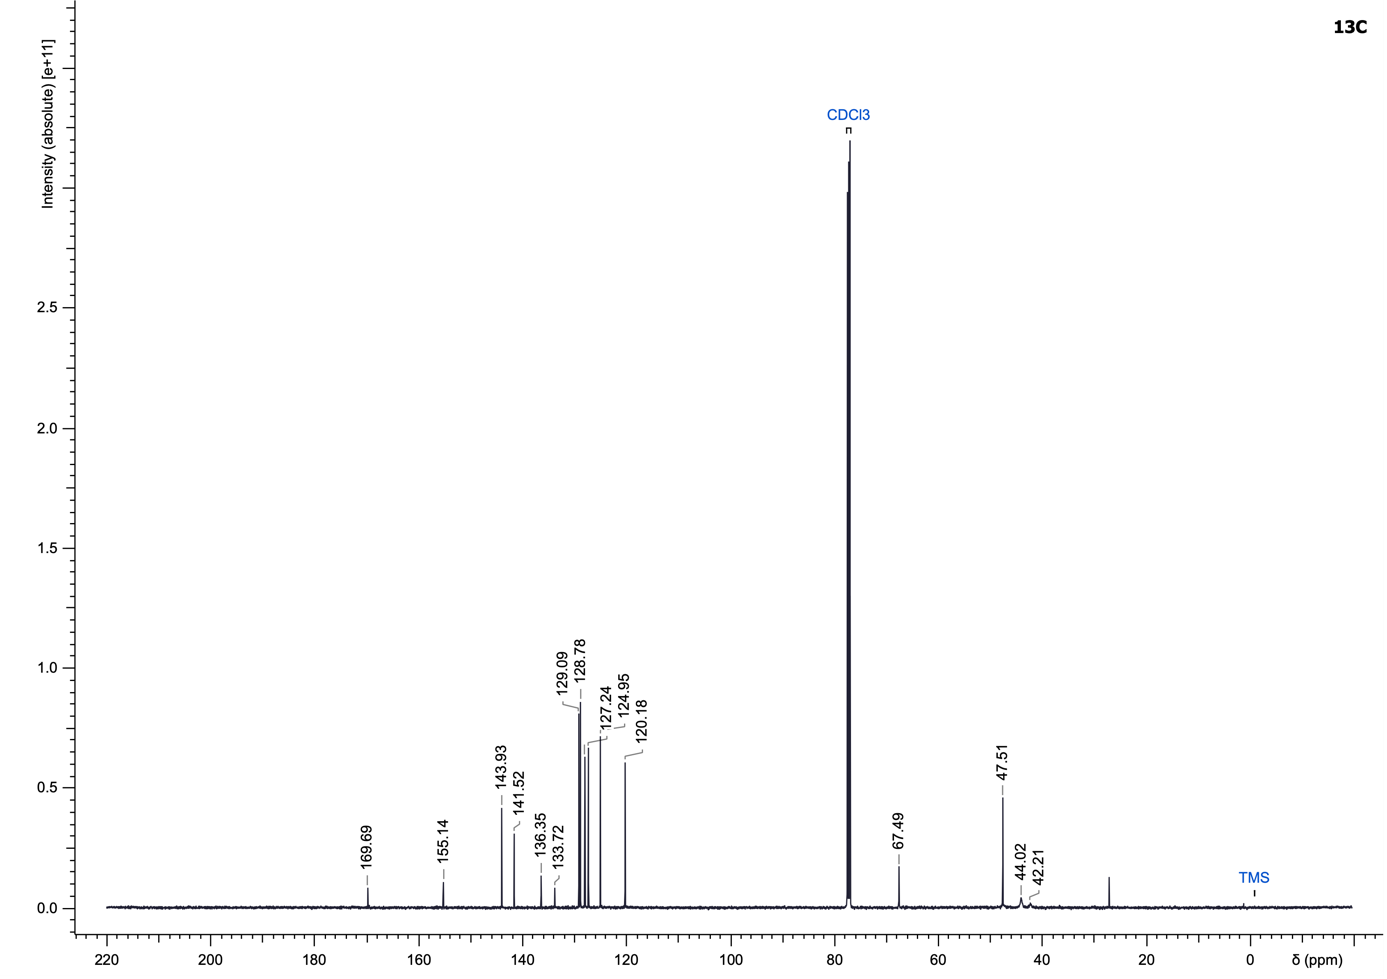


(4-(4-Chlorobenzoyl)piperazin-1-yl)(2,4-difluoro-3-methoxyphenyl)methanone (39)

Compound **39** was synthesized according to the **General Procedure G** using 2,4-difluoro-3-methoxybenzoyl chloride and (4-chlorophenyl)(piperazin-1-yl)methanone (311.54 µmol) as starting materials and purified using dichloromethane/methanol (0 to 6% methanol) to yield a colourless gel (104.2 mg, 85%).

**LC–MS** (ESI): tR = 3.27 min; 97% purity (UV at 254 nm);

**1H NMR** (500 MHz, CDCl3): *δ* 7.46–7.33 (m, 4H), 7.06–6.95 (m, 2H), 4.01 (s, 3H), 3.98–3.07 (m, 8H);

**13C NMR** (126 MHz, CDCl3): *δ* 169.8, 164.6, 156.80 (d, *J* = 252.8 Hz), 156.77 (d, *J* = 251.9 Hz), 136.5, 133.4, 129.2 (2C), 128.8 (2C), 126.3, 122.3 (dd, *J* = 9.7, 4.1 Hz), 120.6 (dd, *J* = 16.5, 3.7 Hz), 113.4 (dd, *J* = 19.8, 3.2 Hz), 62.2 (t, *J* = 3.2 Hz), 47.2 (2C), 42.4 (2C);

**19F NMR** (470 MHz, CDCl3): *δ* -124.7 (br d, *J* = 5.2 Hz), -129.8 (br t, *J* = 8.7 Hz);

**HRMS** (ESI+) *m*/*z*: [M+H]+ calculated for C19H17ClF2N2O3, 395.0969 found, 395.0969.


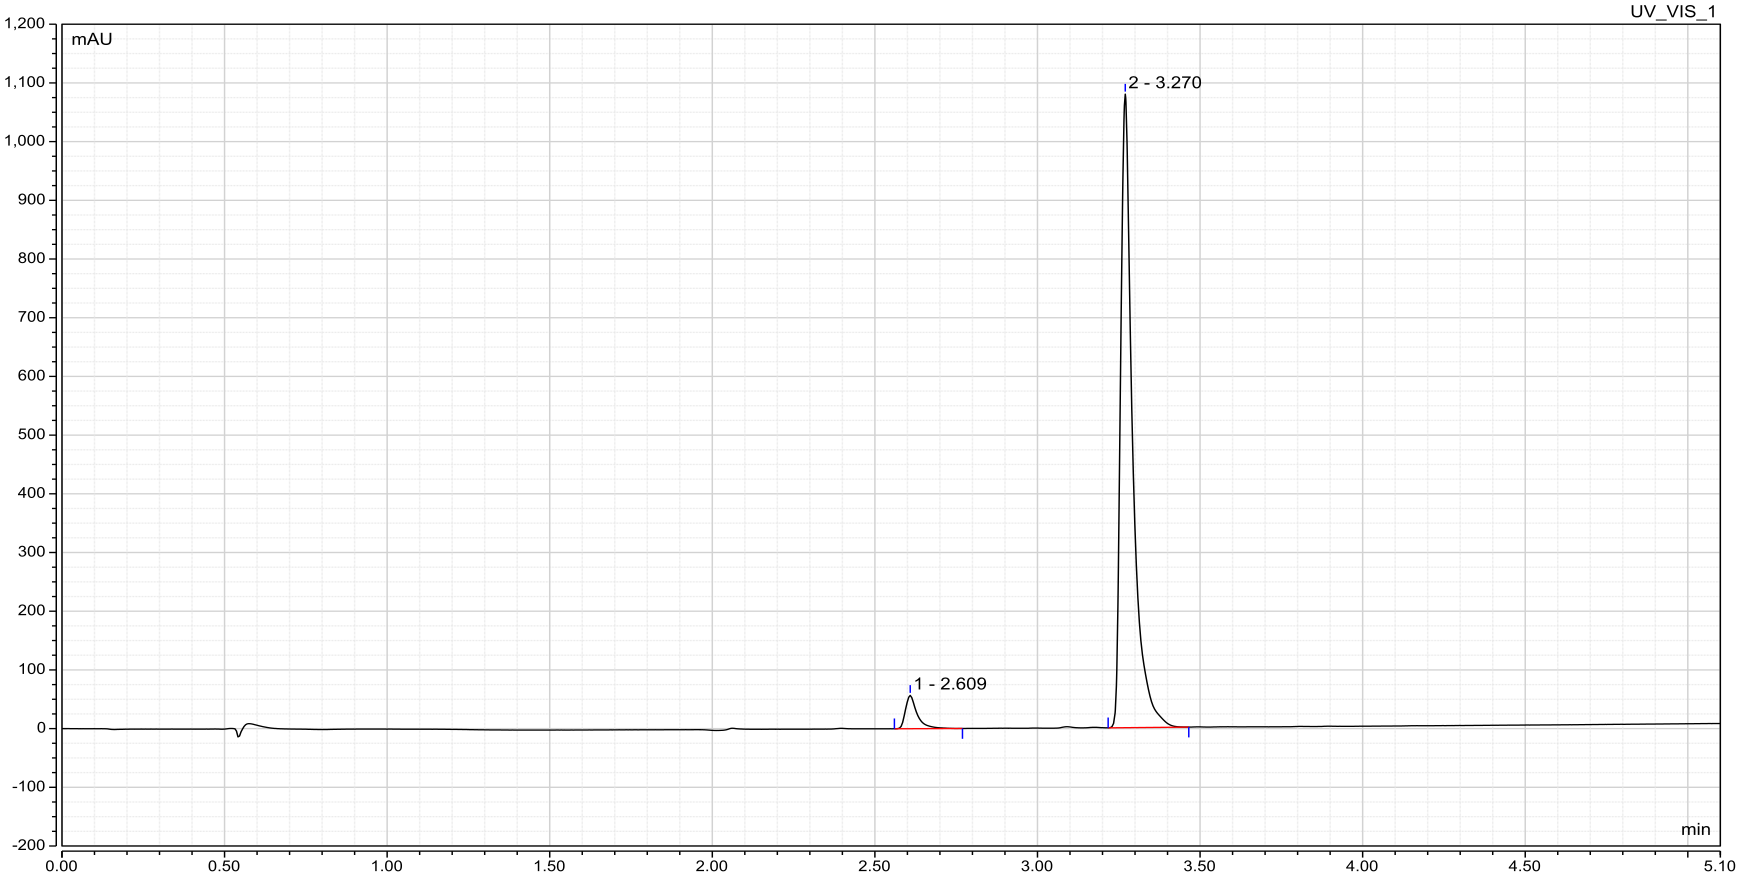


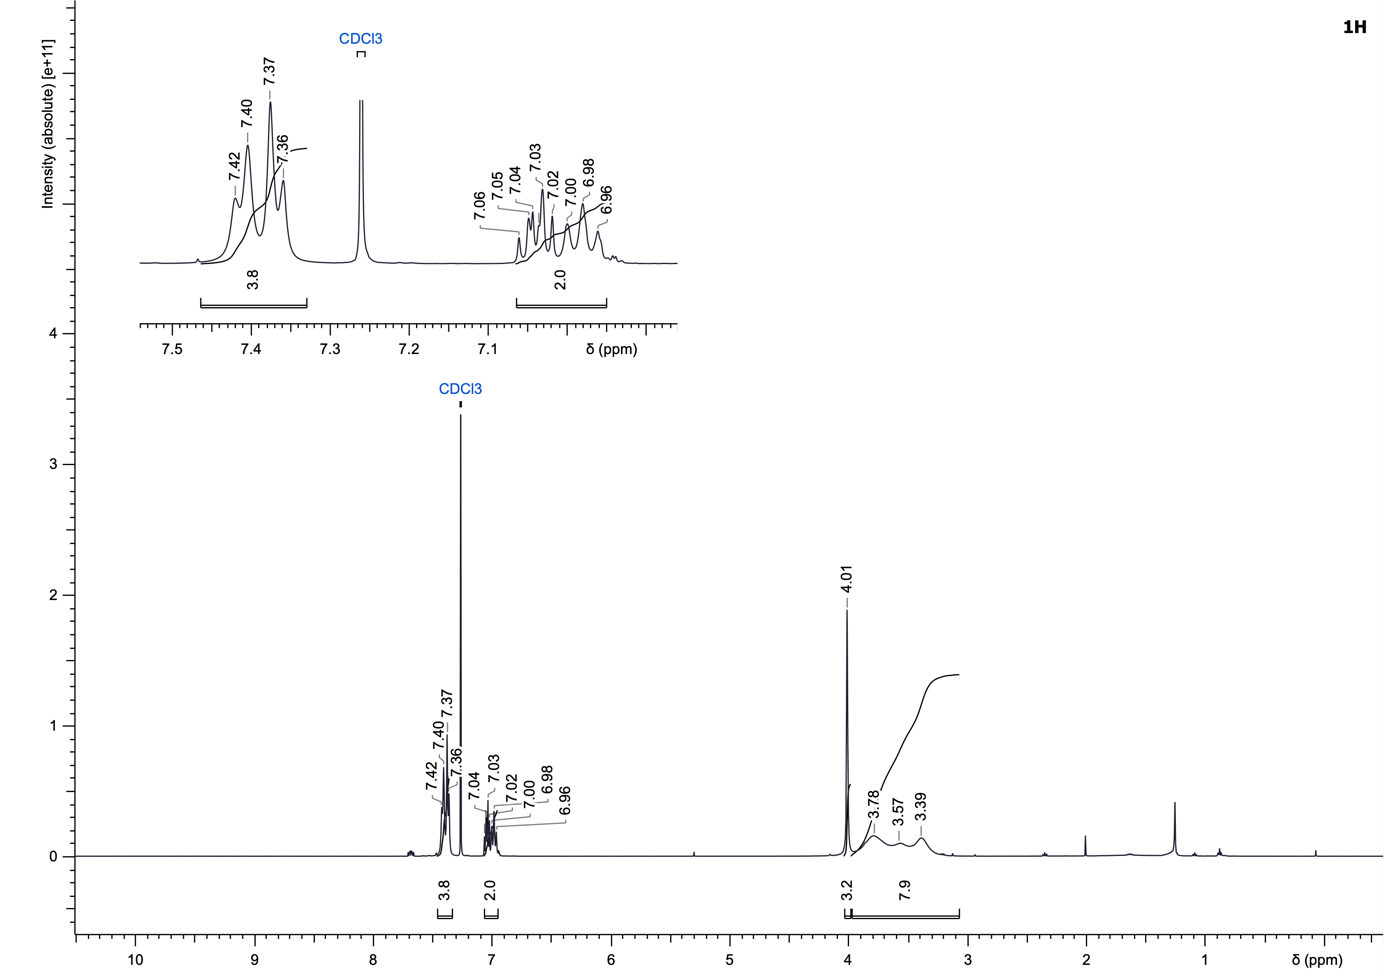


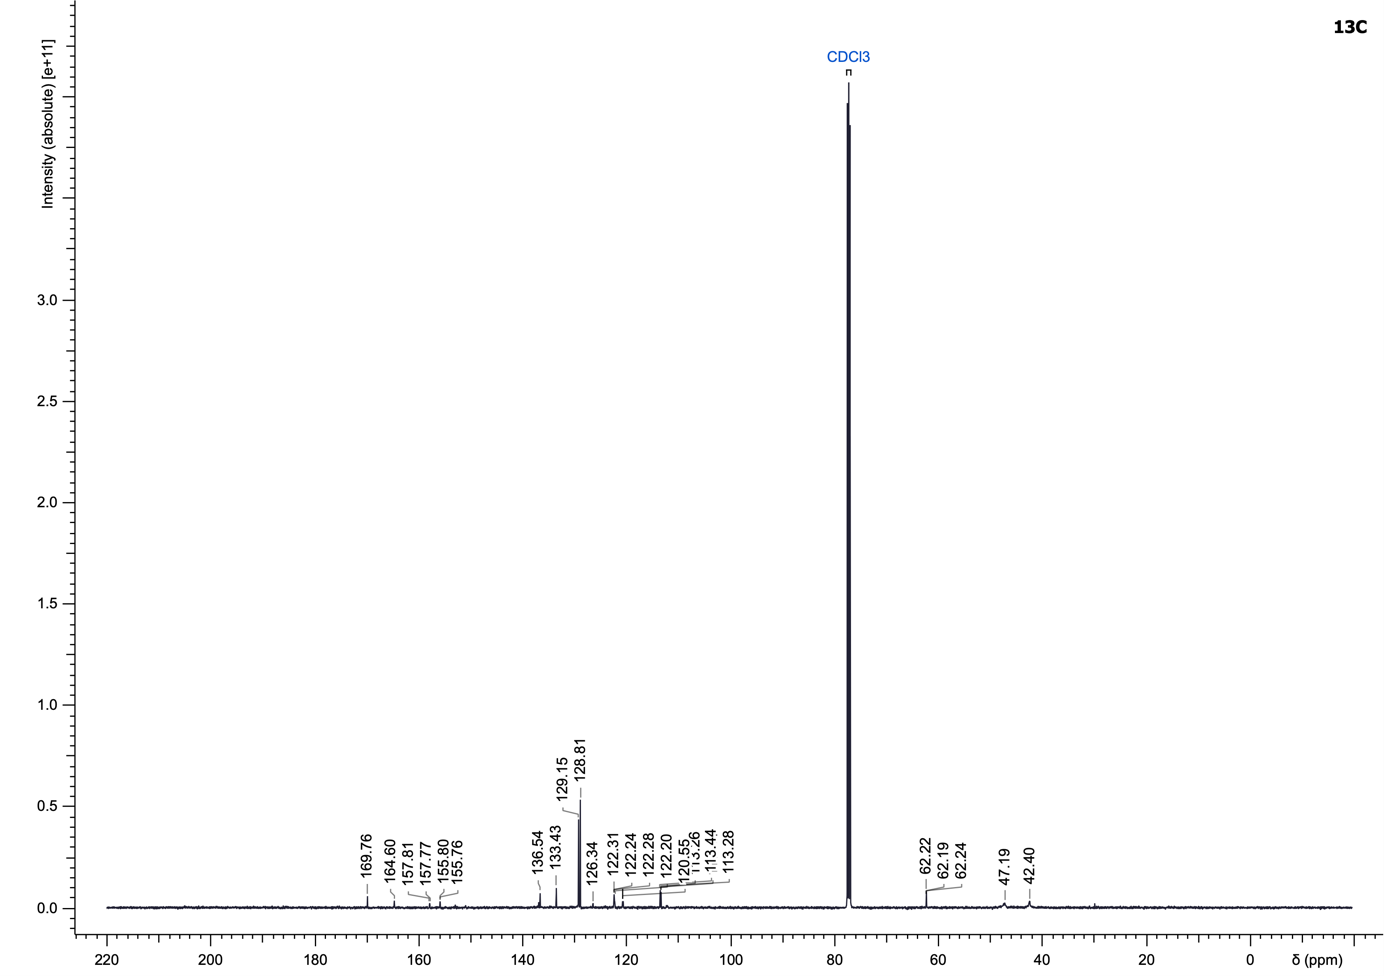


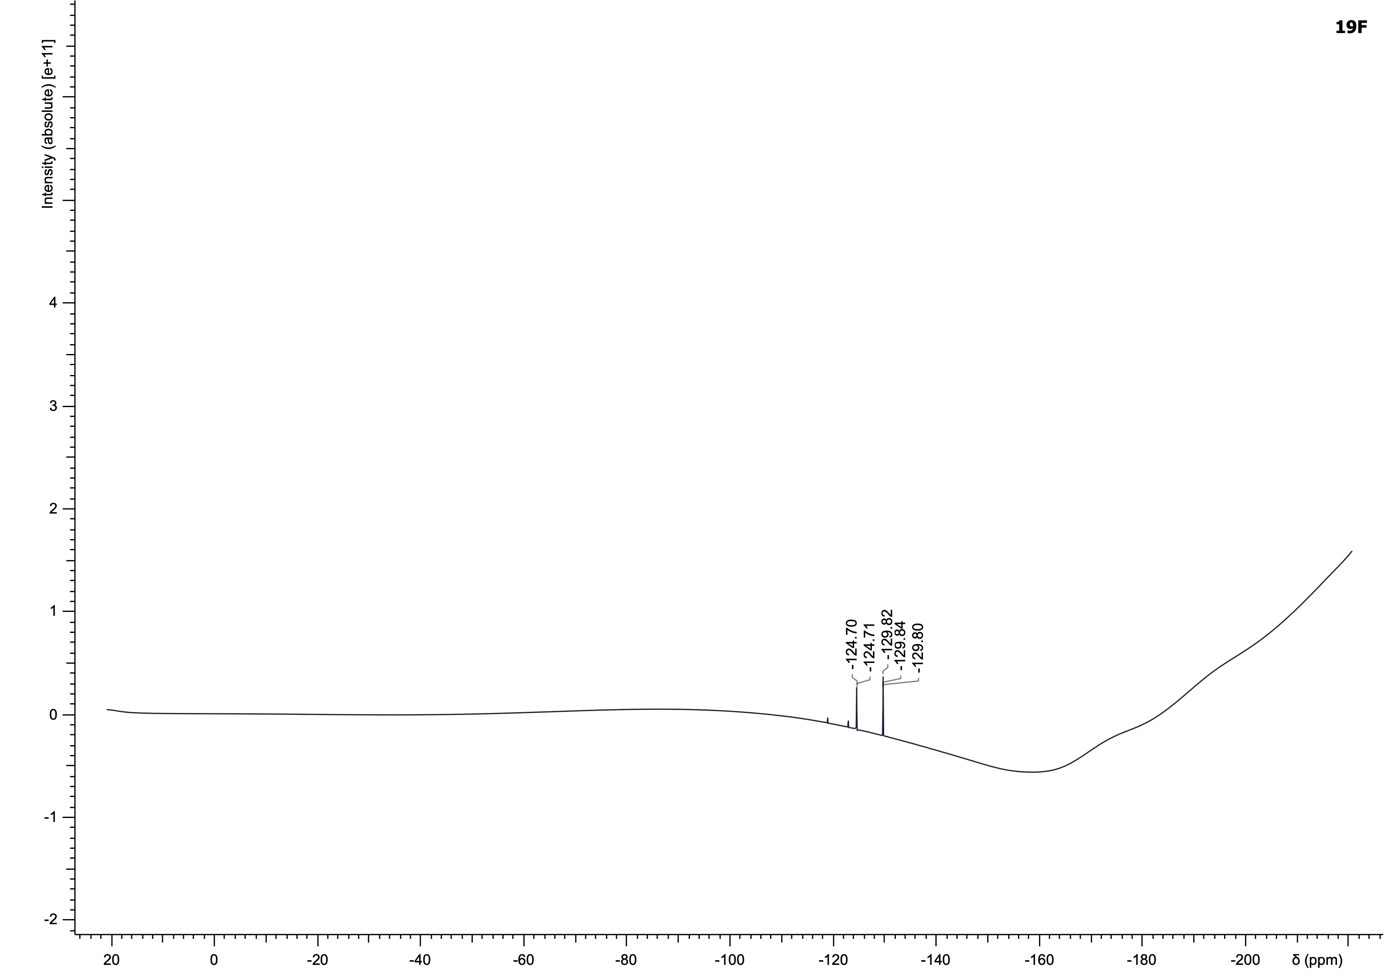


(4-(4-Chlorobenzoyl)piperazin-1-yl)(2,4,5-trifluoro-3-methoxyphenyl)methanone (40)

Compound **40** was synthesized according to the **General Procedure G** using 2,4,5-trifluoro-3-methoxybenzoyl chloride and (4-chlorophenyl)(piperazin-1-yl)methanone (311.54 µmol) as starting materials and purified using dichloromethane/methanol (0 to 8% methanol) to yield a colourless gel (125.7 mg, 99%).

**LC–MS** (ESI): tR = 3.40 min; > 99% purity (UV at 254 nm);

**1H NMR** (500 MHz, DMSO-*d*6): *δ* 7.52 (br d, *J* = 7.5 Hz, 2H), 7.47 (br d, *J* = 7.7 Hz, 2H), 7.39–7.28 (m, 1H), 4.01 (br s, 3H), 3.83–3.51 (m, 4H), 3.51–3.34 (m, 2H), 3.32–3.18 (m, 2H);

**13C NMR** (126 MHz, DMSO-*d*6): *δ* 168.2, 162.0, 147.1 (d, *J* = 244.4 Hz), 146.9 (br dd, *J* = 244.8, 11.2 Hz), 144.1 (br ddd, *J* = 250.7, 15.4, 5.6 Hz), 137.4 (br t, *J* = 13.3 Hz), 134.4, 134.3, 129.1 (2C), 128.6 (2C), 120.0–119.8 (m), 109.1 (dd, *J* = 20.7, 4.1 Hz), 62.2 (t, *J* = 3.2 Hz), 46.2 (2C), 41.6 (2C);

**19F NMR** (470 MHz, DMSO-*d*6): *δ* -135.6 (br d, *J* = 53.8 Hz), -139.9–-139.9 (m), -150.1 (dt, *J* = 22.1, 7.2 Hz);

**HRMS** (ESI+) *m*/*z*: [M+H]+ calculated for C19H16ClF3N2O3, 413.0875 found, 413.0877.


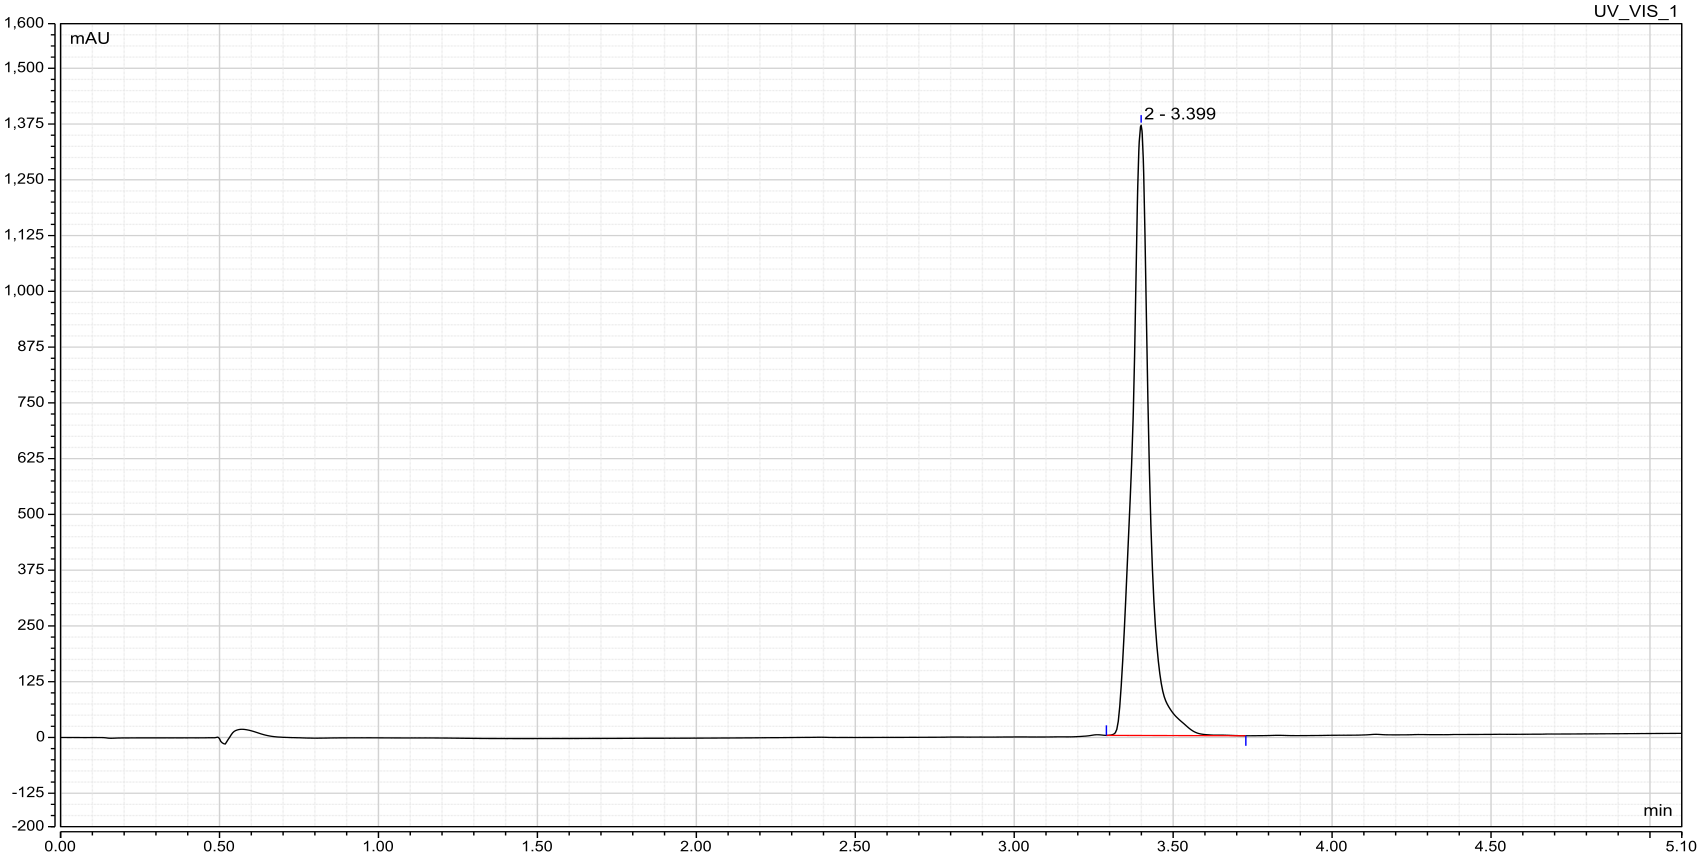


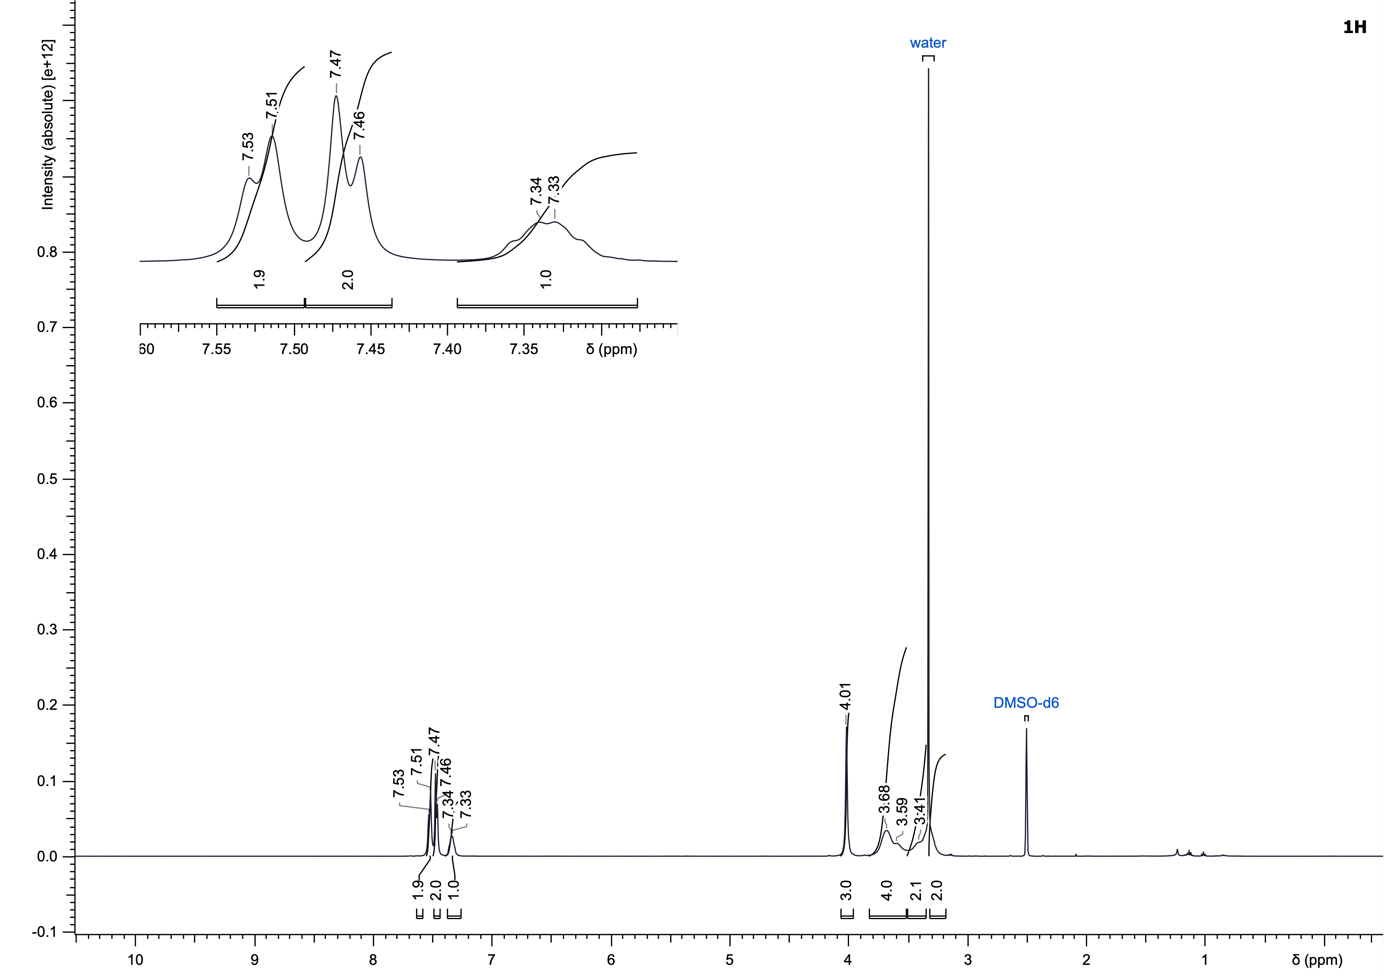


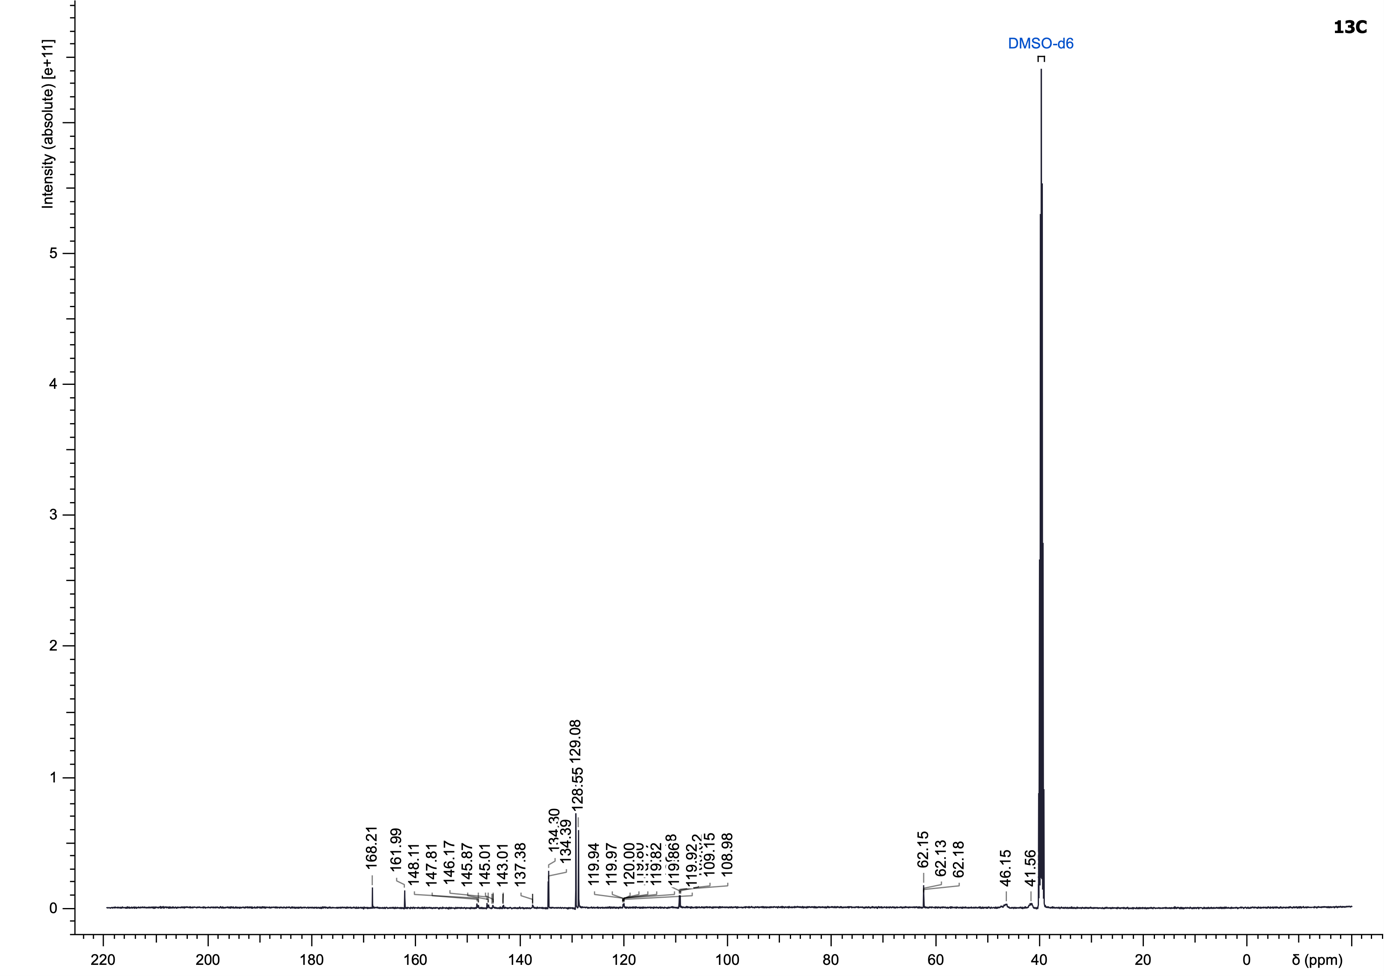


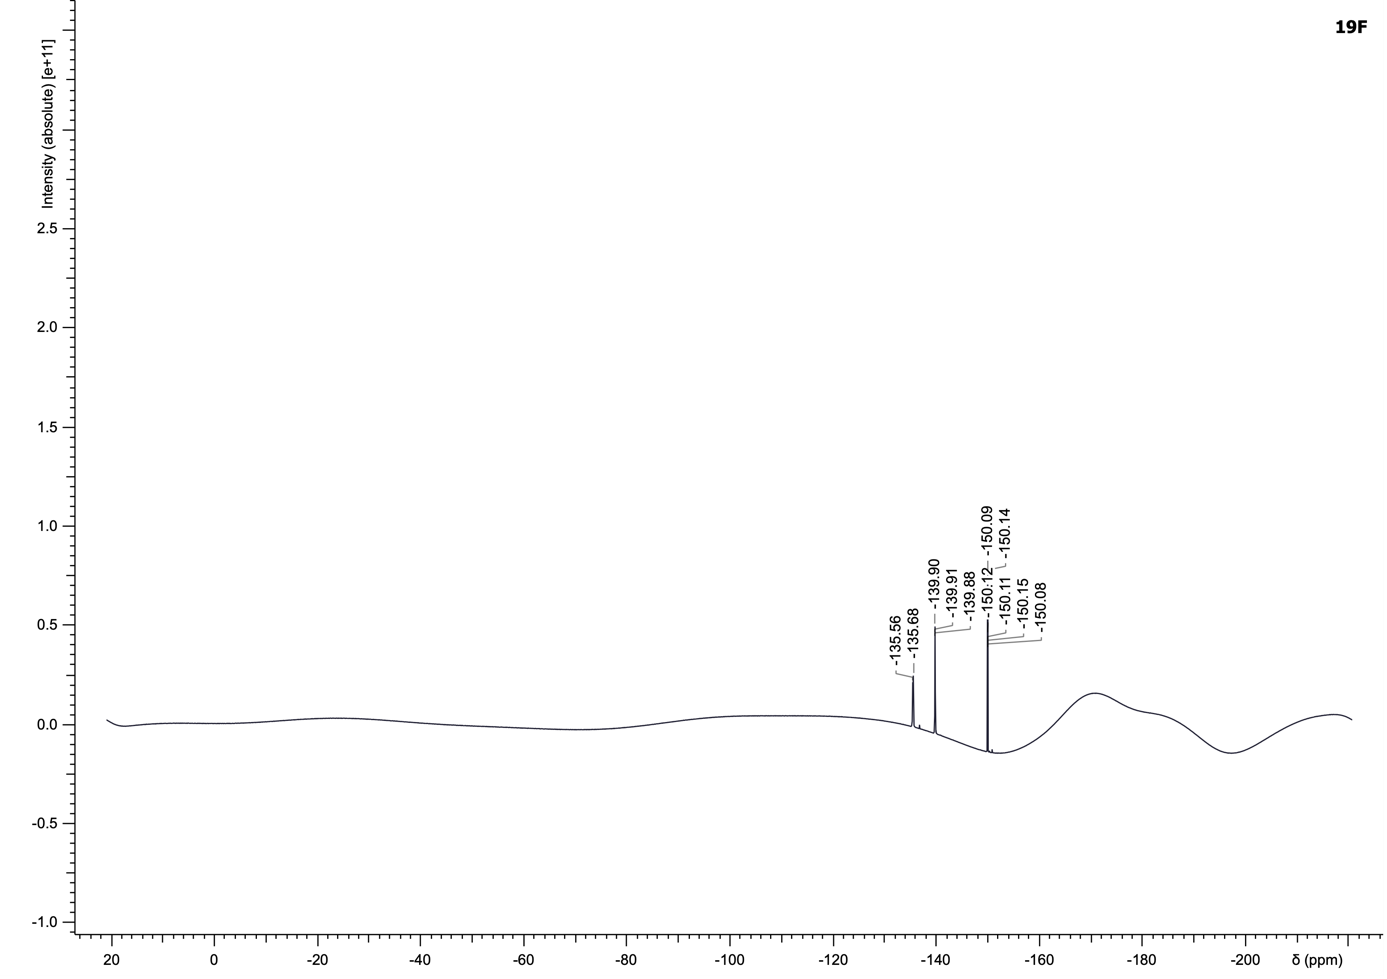


4-(4-Chlorobenzoyl)-*N*,*N*-diphenylpiperazine-1-carboxamide (41)

To a solution of diphenylcarbamic chloride (1.5 eq) in DCM (0.2 M) were added triethylamine (3.0 eq) and (4-chlorophenyl)(piperazin-1-yl)methanone (734.35 µmol, 1.0 eq). The reaction mixture was stirred at room temperature overnight. Upon completion, the reaction mixture was diluted with DCM (10 mL), washed with 1 M HCl (10 mL) and water (10 mL). The combined aqueous phases were back-extracted with dichloromethane (10 mL). All organic phases were combined, dried over MgSO4, and concentrated under reduced pressure. The crude product was purified by normal-phase flash chromatography on silica gel using a gradient of dichloromethane/methanol (0 to 10% methanol) to yield the desired carbamide **41** as a colourless gel (107.6 mg, 35%).

**LC–MS** (ESI): tR = 3.69 min; > 99% purity (UV at 254 nm);

**1H NMR** (500 MHz, DMSO-*d*6): *δ* 7.49 (d, *J* = 8.4 Hz, 2H), 7.40 (m, *J* = 8.4 Hz, 2H), 7.34 (t, *J* = 7.8 Hz, 4H), 7.15 (t, *J* = 7.3 Hz, 2H), 7.00 (d, *J* = 7.8 Hz, 4H), 3.61–3.33 (m, 4H), 3.31–3.09 (m, 4H);

**13C NMR** (126 MHz, DMSO-*d*6): *δ* 168.2, 158.7, 144.6 (2C), 134.4, 134.3, 129.3 (4C), 129.0 (2C), 128.5 (2C), 124.9 (4C), 124.6 (2C), 46.5, 44.9 (2C), 41.1;

**HRMS** (ESI+) *m*/*z*: [M+H]+ calculated for C24H22ClN3O2, 420.1474 found, 420.1475.


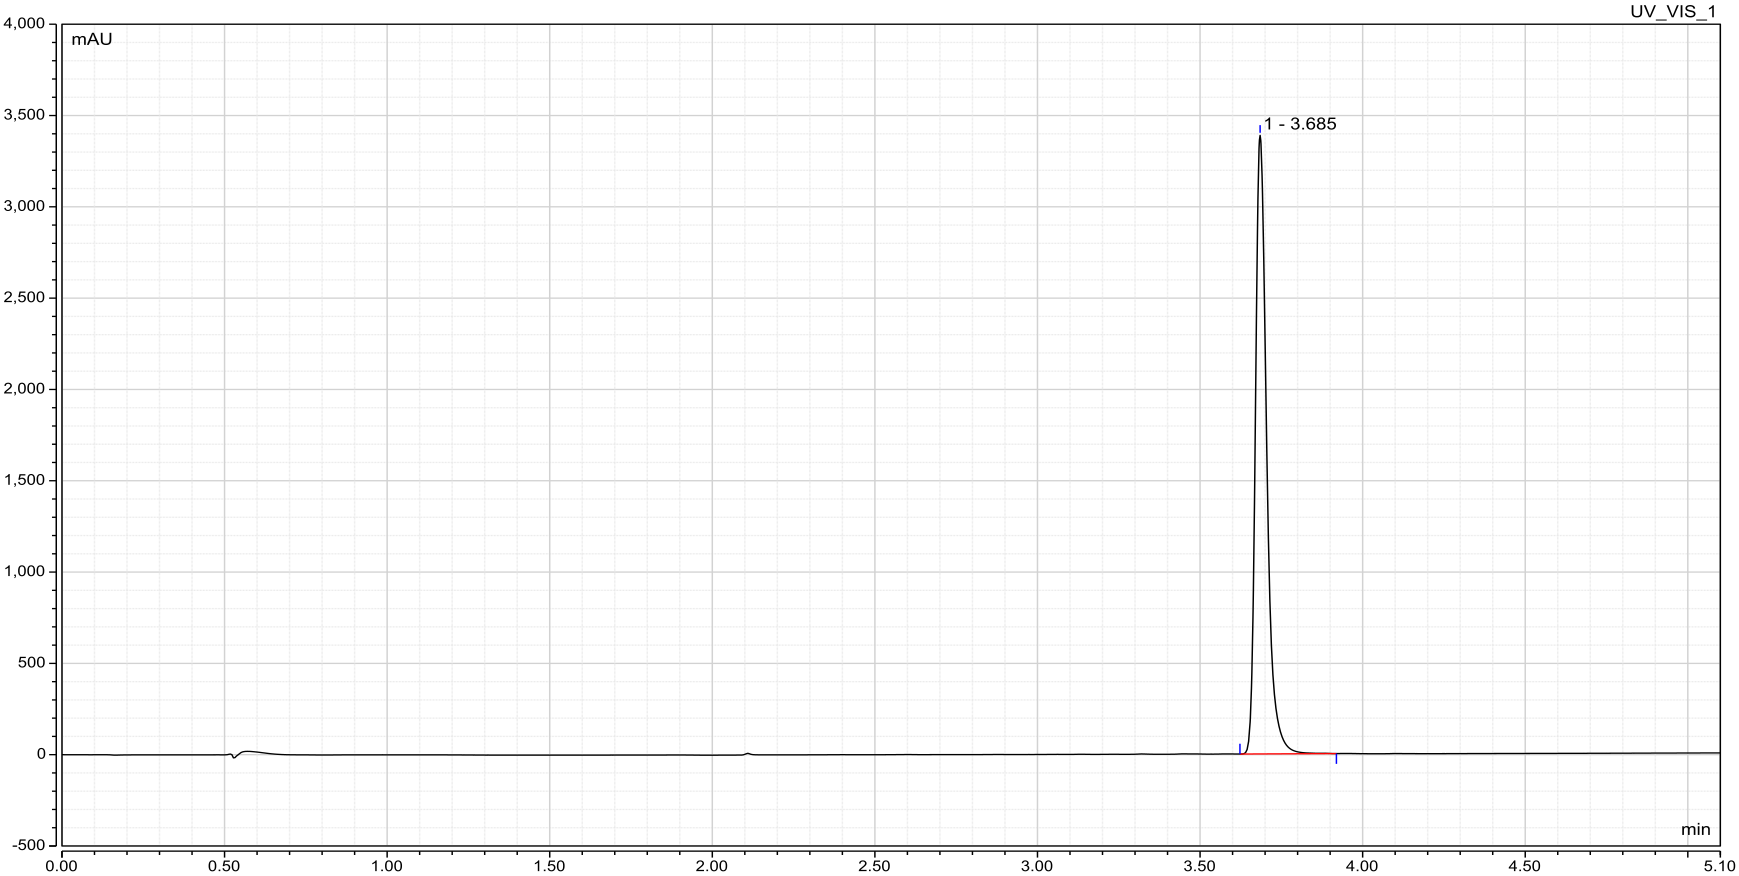


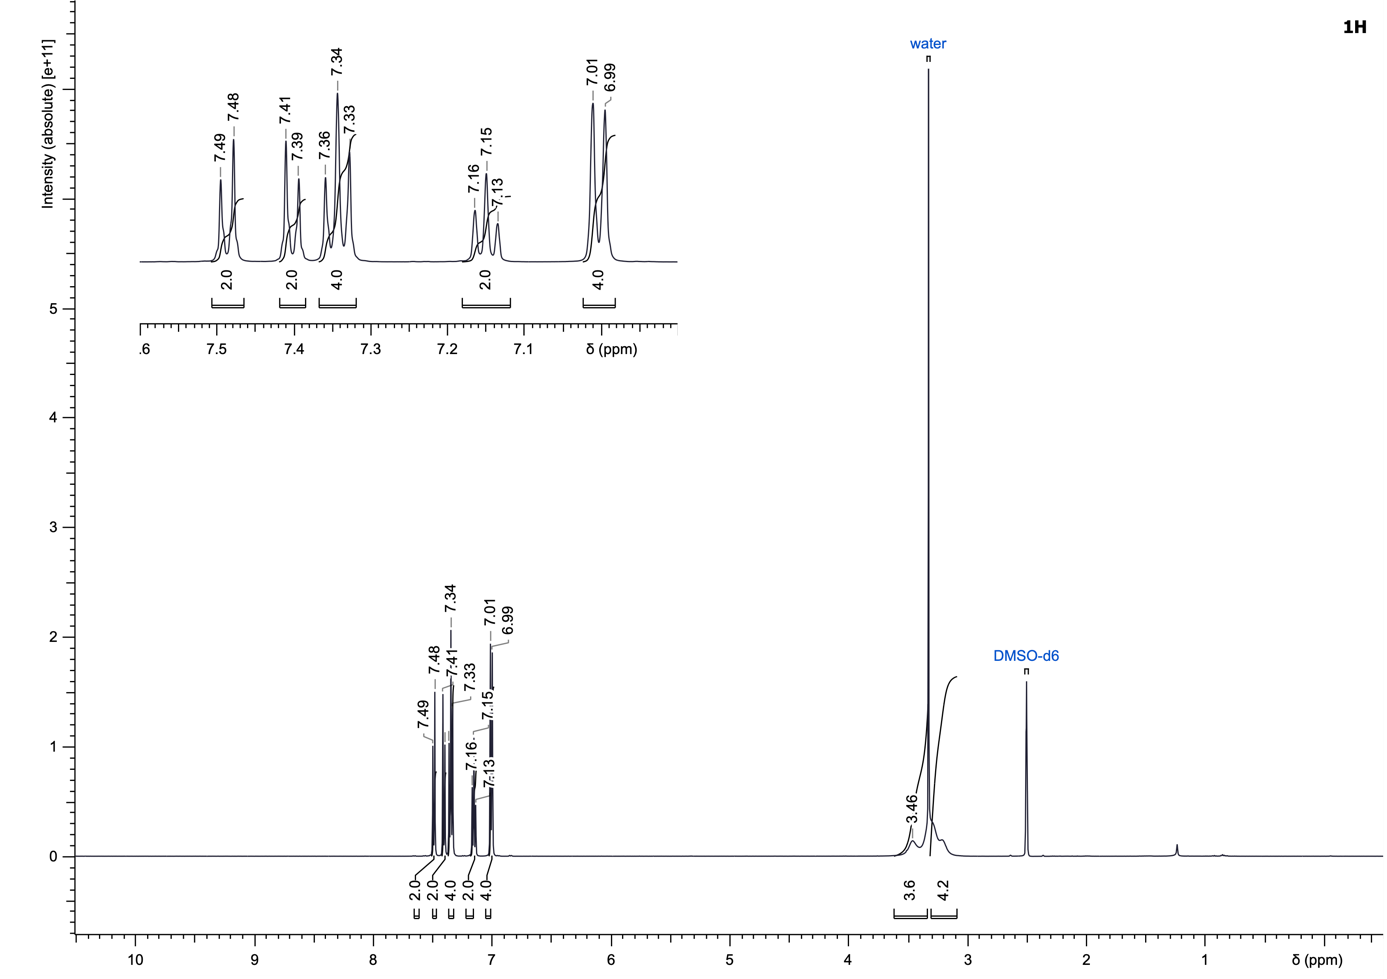


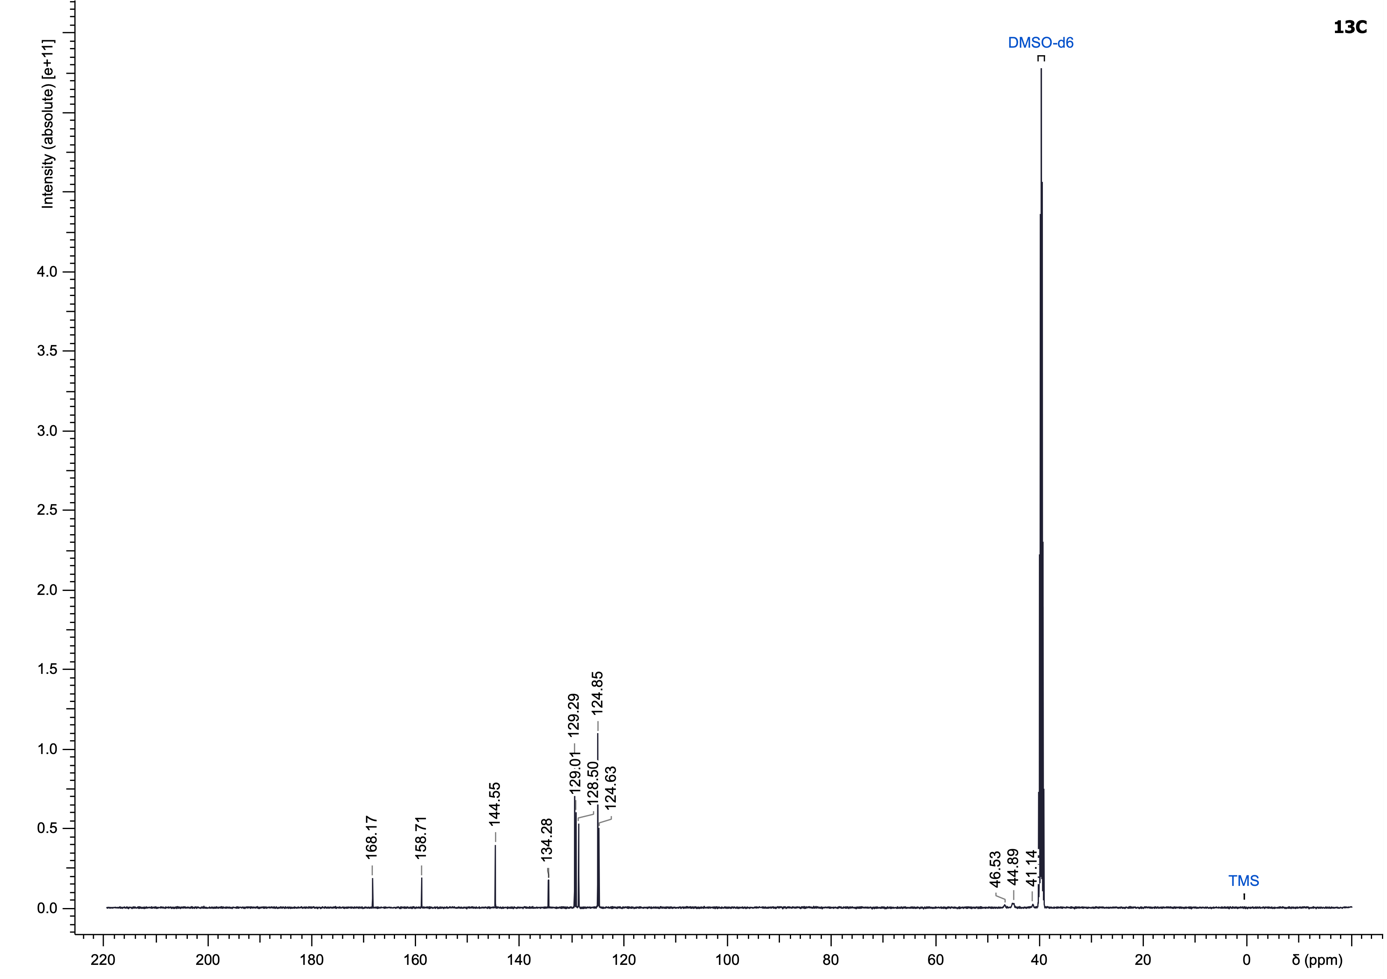


(4-((6-(Benzyloxy)-1*H*-indol-3-yl)methyl)piperazin-1-yl)(4-chlorophenyl)methanone (42)

Compound **42** was synthesized according to the **General Procedure H** using (4-chlorophenyl)(piperazin-1-yl)methanone (267.04 µmol) and 6-(benzyloxy)-1*H*-indole-3-carbaldehyde as starting materials and purified using dichloromethane/methanol (0 to 10% methanol) to yield an orange gel (97.7 mg, 80%).

**LC–MS** (ESI): tR = 2.97 min; > 99% purity (UV at 254 nm);

**1H NMR** (500 MHz, DMSO-*d*6): *δ* 10.73 (s, 1H), 7.52–7.45 (m, 5H), 7.41–7.37 (m, 4H), 7.35–7.28 (m, 1H), 7.08 (d, *J* = 2.0 Hz, 1H), 6.91 (d, *J* = 2.3 Hz, 1H), 6.72 (dd, *J* = 8.5, 2.1 Hz, 1H), 5.10 (s, 2H), 3.60 (s, 2H), 3.60–3.47 (m, 2H), 3.32–3.22 (m, 2H), 2.48–2.28 (m, 4H);

**13C NMR** (126 MHz, DMSO-*d*6): *δ* 167.8, 154.5, 137.7, 136.9, 134.8, 134.1, 128.9 (2C), 128.5 (2C), 128.4 (2C), 127.6, 127.5 (2C), 123.5, 122.1, 119.7, 110.3, 109.3, 95.9, 69.5, 53.1, 52.6, 52.1, 47.3, 41.7;

**HRMS** (ESI+) *m*/*z*: [M+H]+ calculated for C27H26ClN3O2, 470.1787; found, 417.1786.


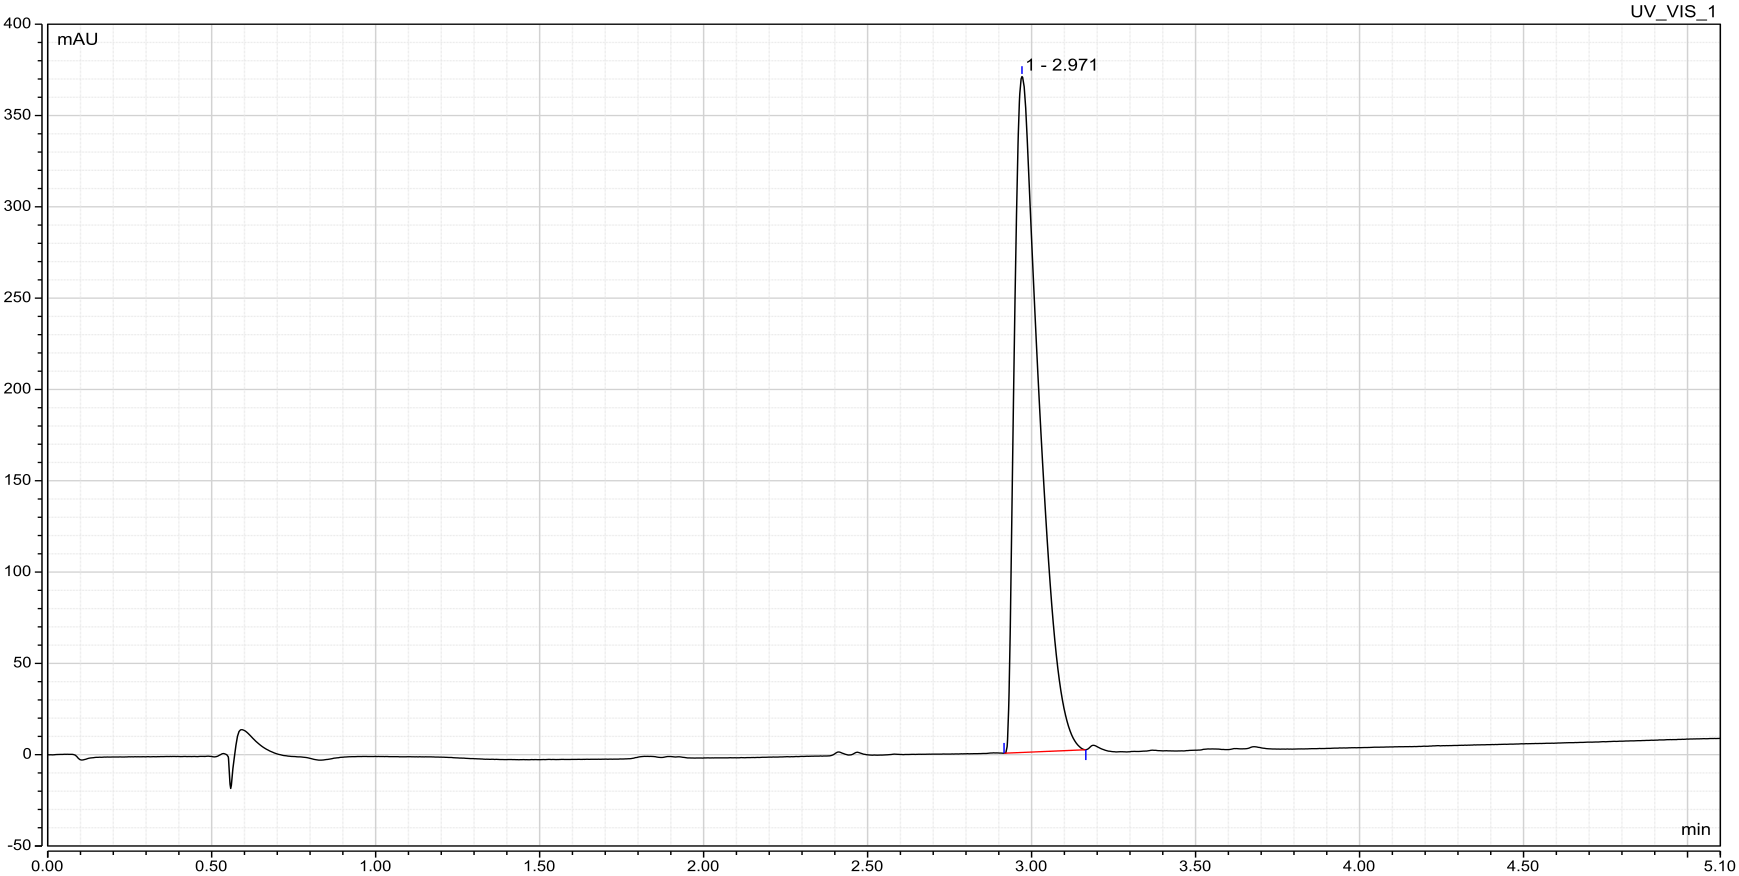


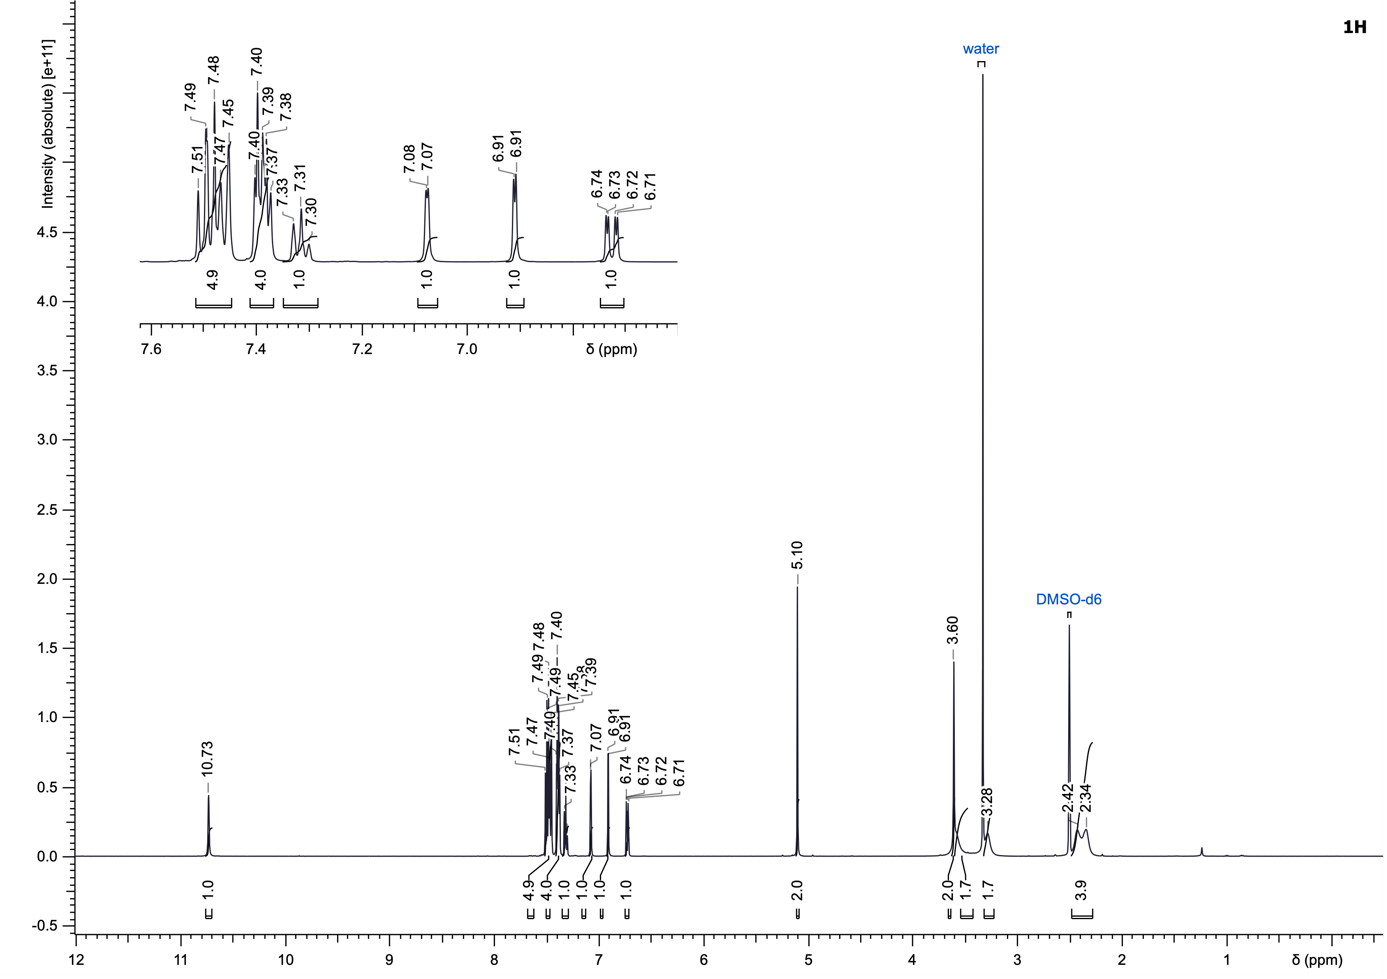


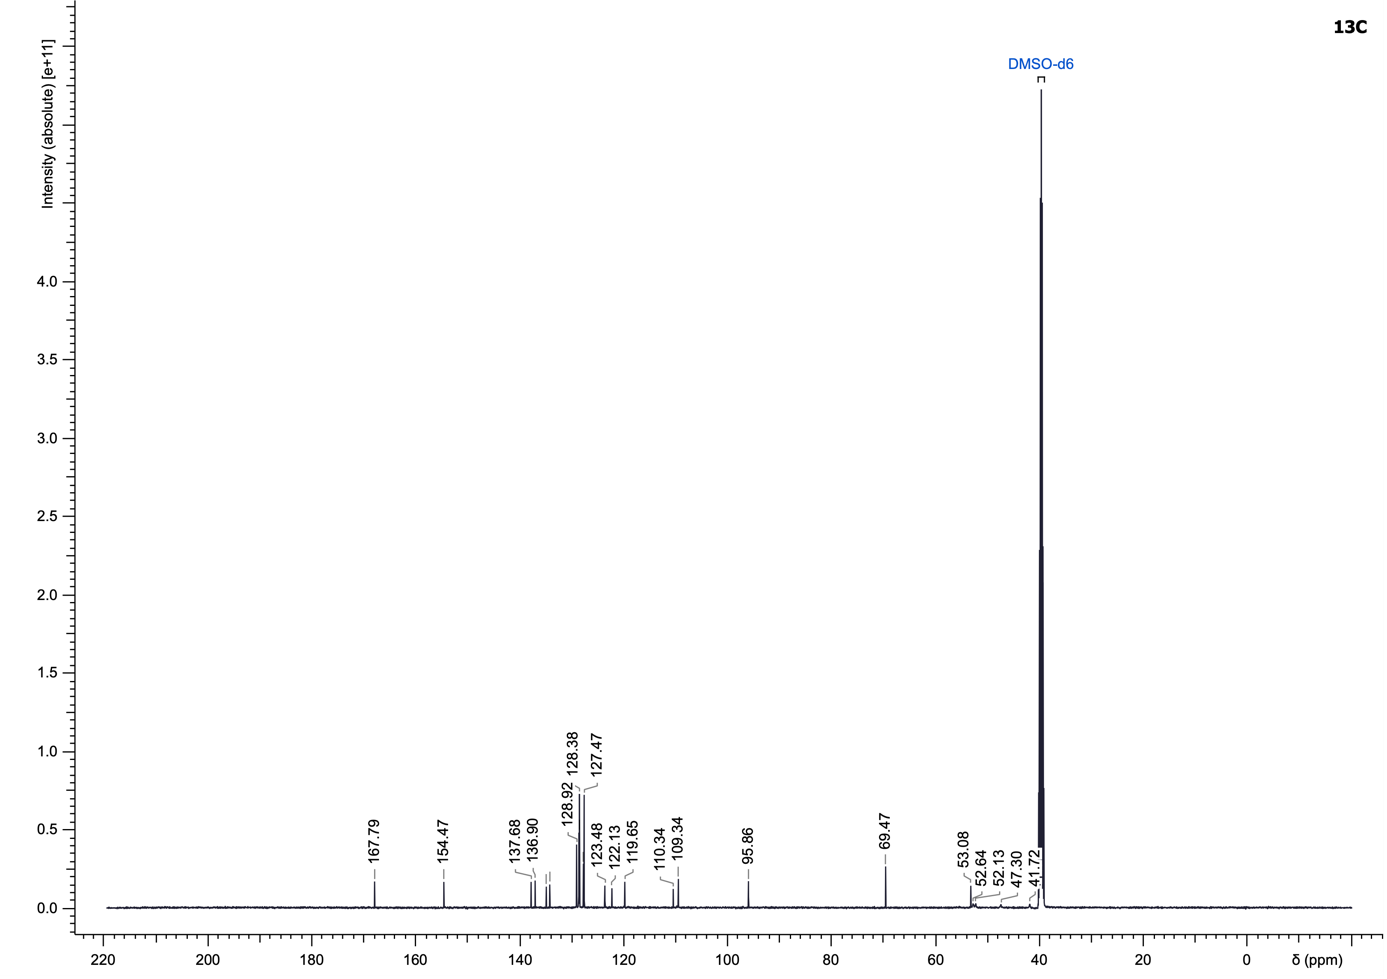


Ethyl 2-(4-(4-chlorobenzoyl)piperazin-1-yl)acetate (43)

Compound **43** was synthesized according to the **General Procedure H** (4-chlorophenyl)(piperazin-1-yl)methanone (267.04 µmol) and ethyl 2-oxoacetate as starting materials and purified using dichloromethane/methanol (0 to 14% methanol) to yield an orange gel (15.2 mg, 18%).

**LC–MS** (ESI): tR = 2.31 min; > 99% purity (UV at 254 nm);

**1H NMR** (500 MHz, DMSO-*d*6): *δ* 7.51 (d, *J* = 8.3 Hz, 2H), 7.41 (d, *J* = 8.3 Hz, 2H), 4.08 (q, *J* = 7.2 Hz, 2H), 3.61 (br s, 2H), 3.32 (br s, 2H), 3.28 (br s, 2H), 2.64–2.50 (m, 3H), 2.49–2.41 (m, 1H), 1.19 (t, *J* = 7.1 Hz, 3H);

**13C NMR** (126 MHz, DMSO-*d*6): *δ* 169.8, 167.9, 134.6, 134.2, 128.9 (2C), 128.5 (2C), 59.9, 58.0, 51.9, 51.5, 47.1, 41.5, 14.1;

**HRMS** (ESI+) *m*/*z*: [M+H]+ calculated for C15H19ClN2O3, 311.1157; found, 311.1158.


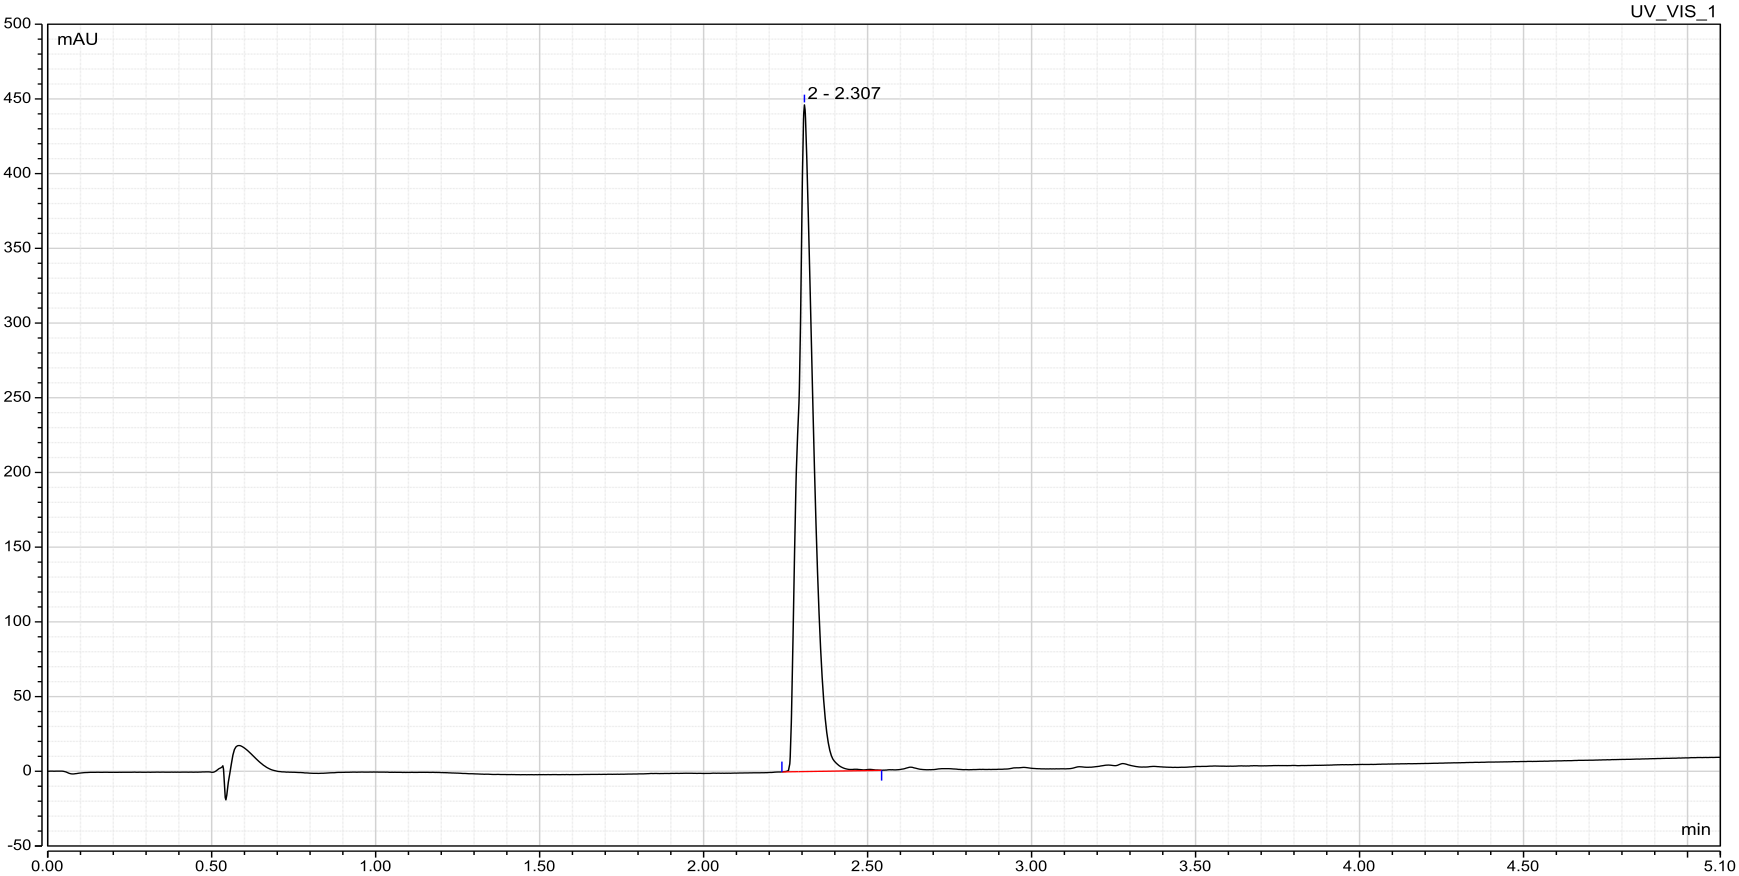


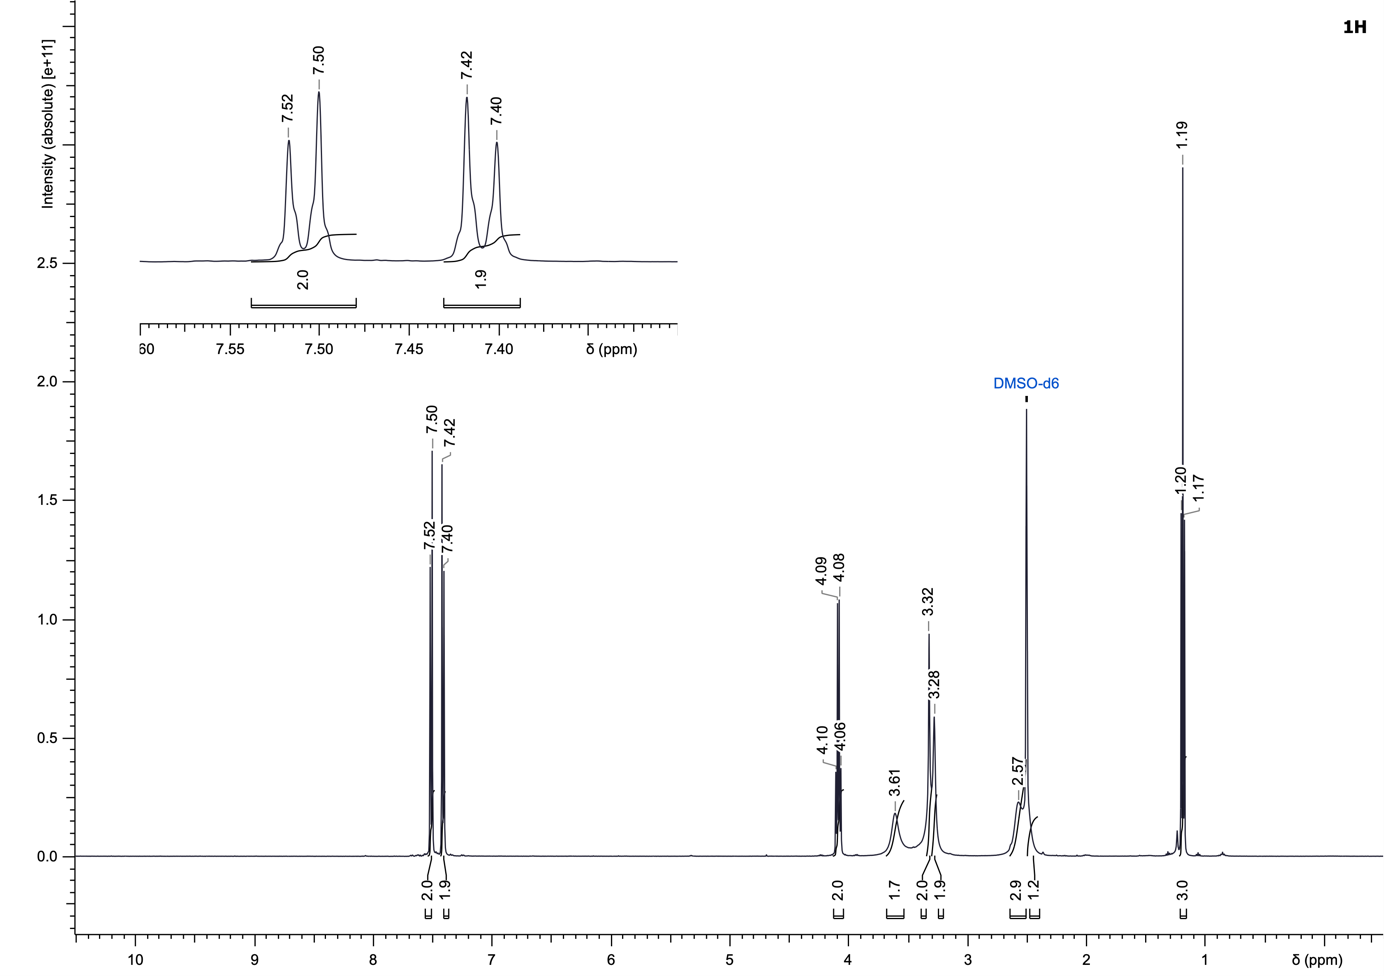


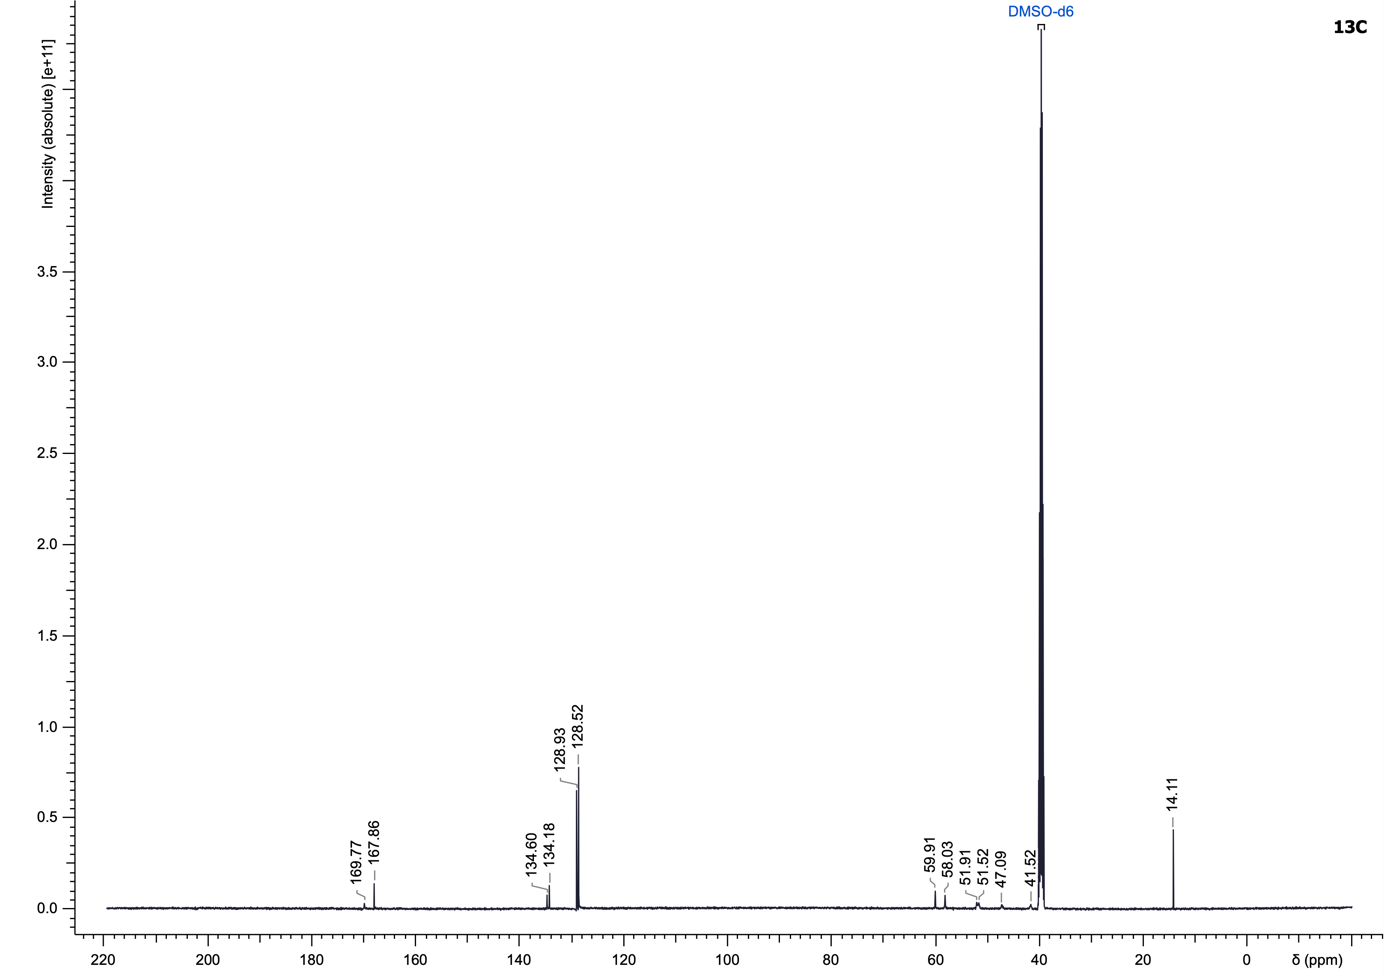


(4-Chlorophenyl)(4-(4-fluoro-3,5-dimethylbenzyl)piperazin-1-yl)methanone (44)

Compound **44** was synthesized according to the **General Procedure H** using (4-chlorophenyl)(piperazin-1-yl)methanone (267.04 µmol) and 4-fluoro-3,5-dimethylbenzaldehyde as starting materials and purified using cyclohexane/ethyl acetate (25 to 100% ethyl acetate) to yield an orange gel (94.9 mg, 98%).

**LC–MS** (ESI): tR = 2.66 min; > 99% purity (UV at 254 nm);

**1H NMR** (500 MHz, DMSO-*d*6): *δ* 7.50 (d, *J* = 8.2 Hz, 2H), 7.40 (d, *J* = 8.4 Hz, 2H), 7.00 (d, *J* = 7.2 Hz, 2H), 3.68–3.48 (m, 2H), 3.38 (s, 2H), 3.30 (br s, 2H), 2.39 (br s, 2H), 2.32 (br s, 2H), 2.21–2.17 (m, 6H);

**13C NMR** (126 MHz, DMSO-*d*6): *δ* 167.8, 158.3 (d, *J* = 240.8 Hz), 134.7, 134.2, 132.9 (d, *J* = 4.6 Hz), 129.4 (d, *J* = 4.6 Hz, 2C), 129.0 (2C), 128.5 (2C), 123.4 (d, *J* = 17.5 Hz, 2C), 61.1, 52.7, 52.2, 47.1, 41.6, 14.3 (d, *J* = 3.7 Hz, 2C);

**19F NMR** (470 MHz, CDCl3): *δ* -123.9;

**HRMS** (ESI+) *m*/*z*: [M+H]+ calculated for C20H22ClFN2O, 361.1478; found, 361.1479.


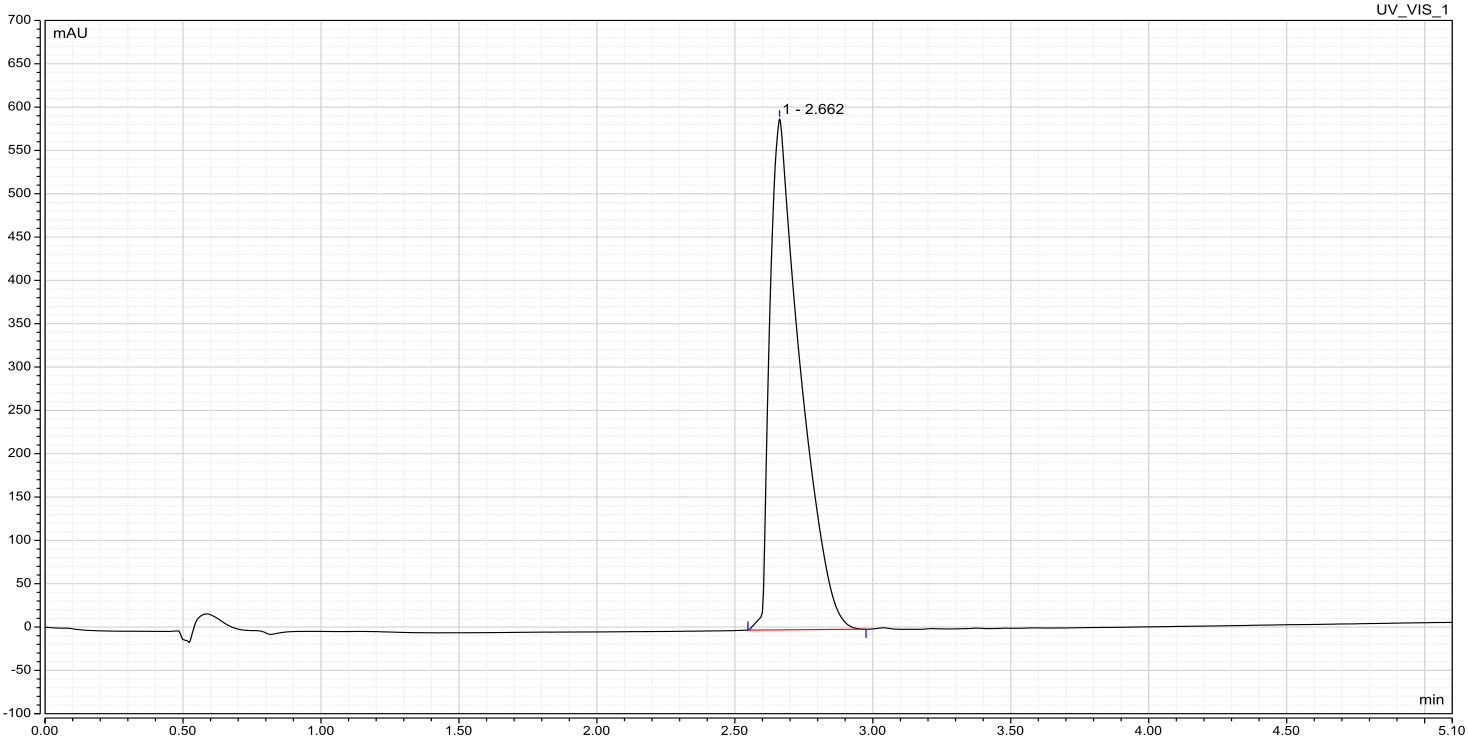


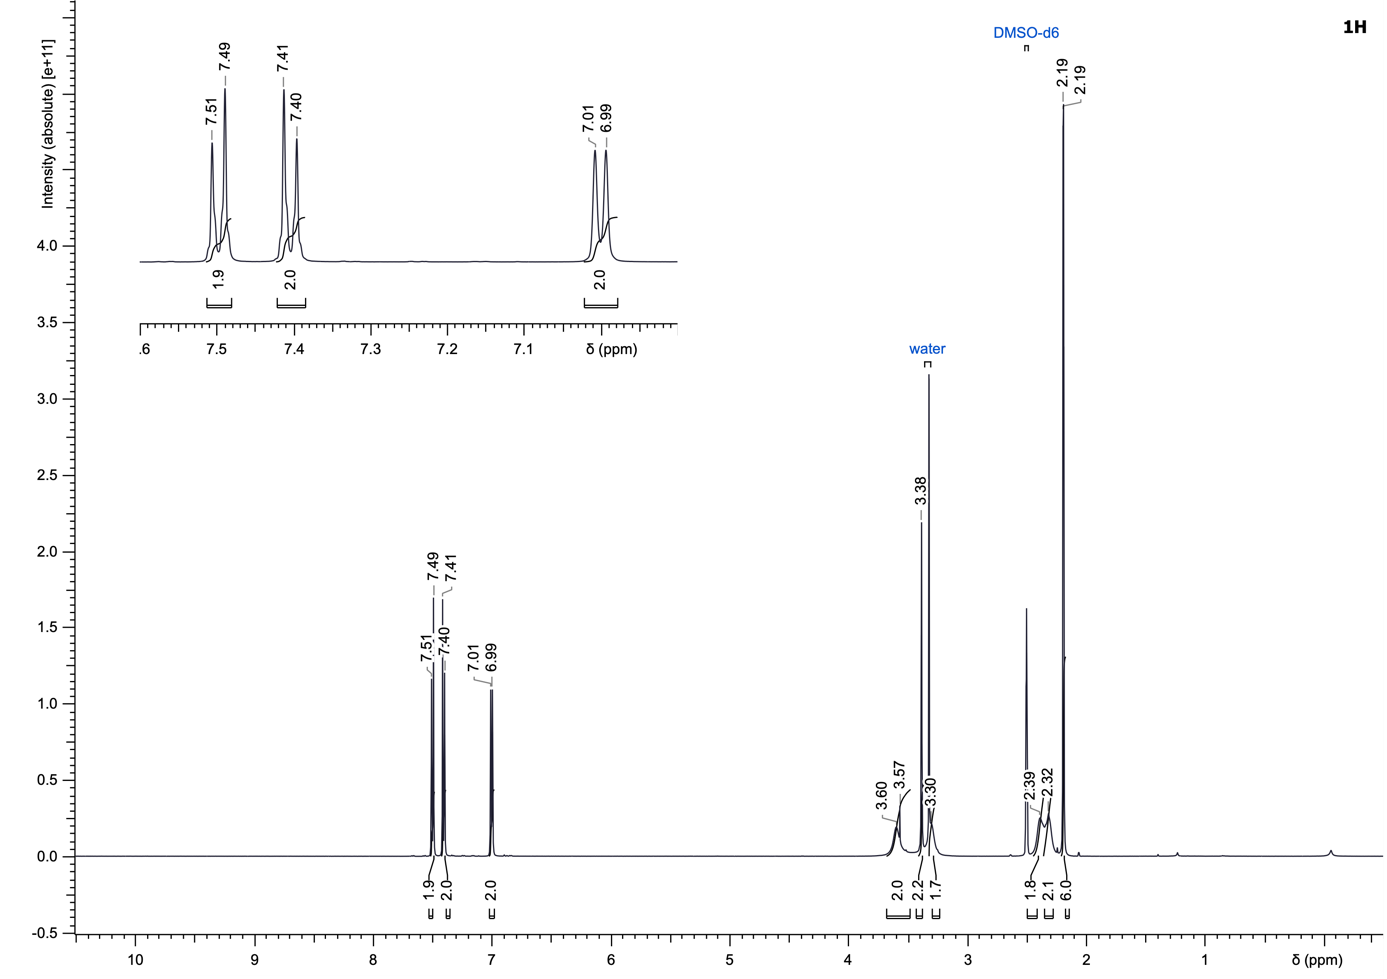


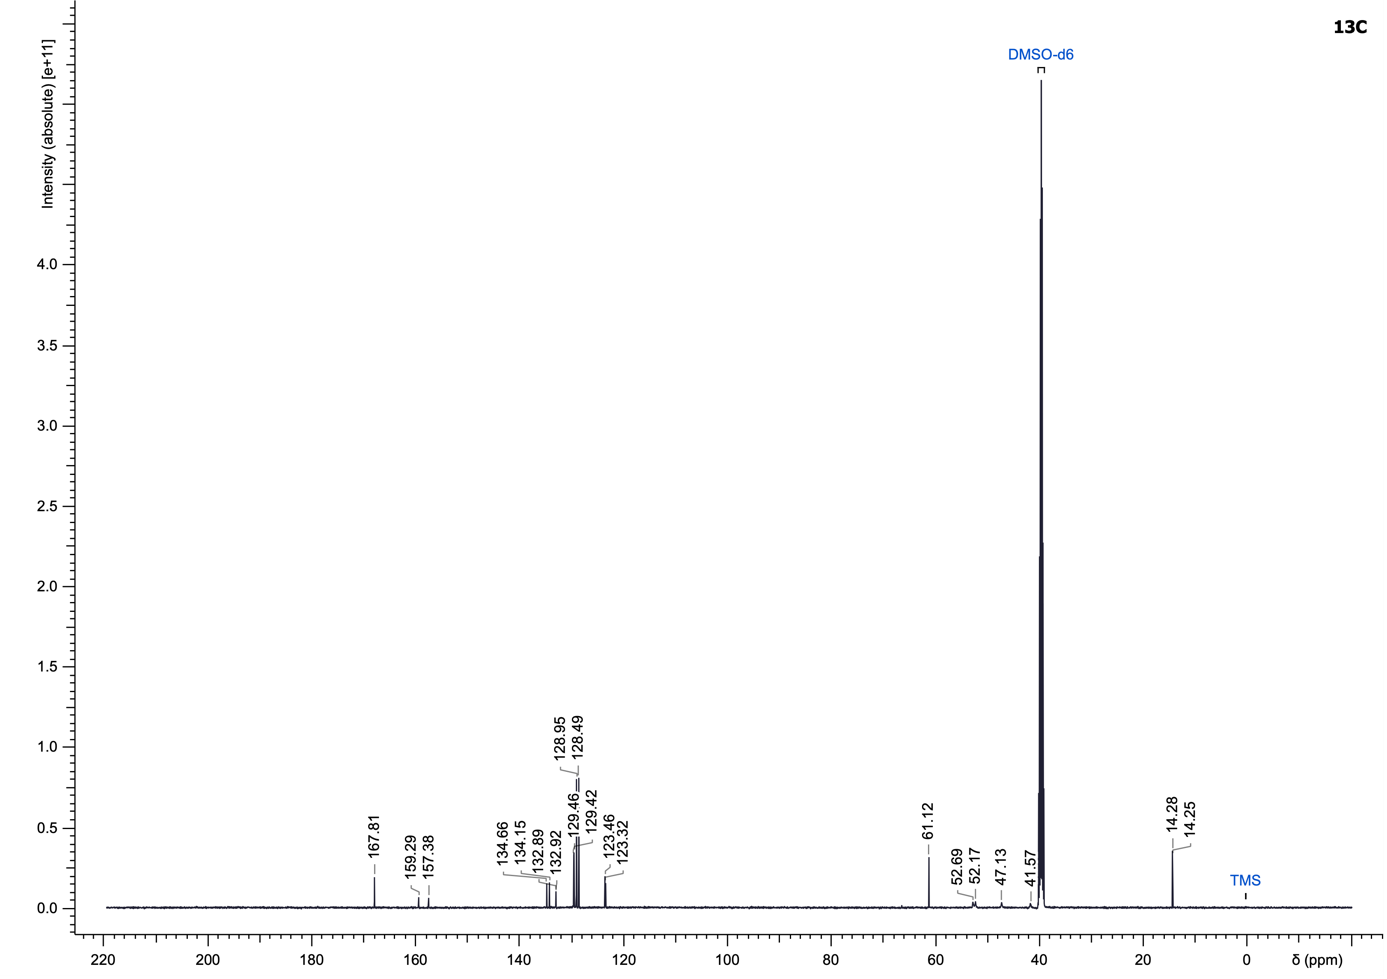


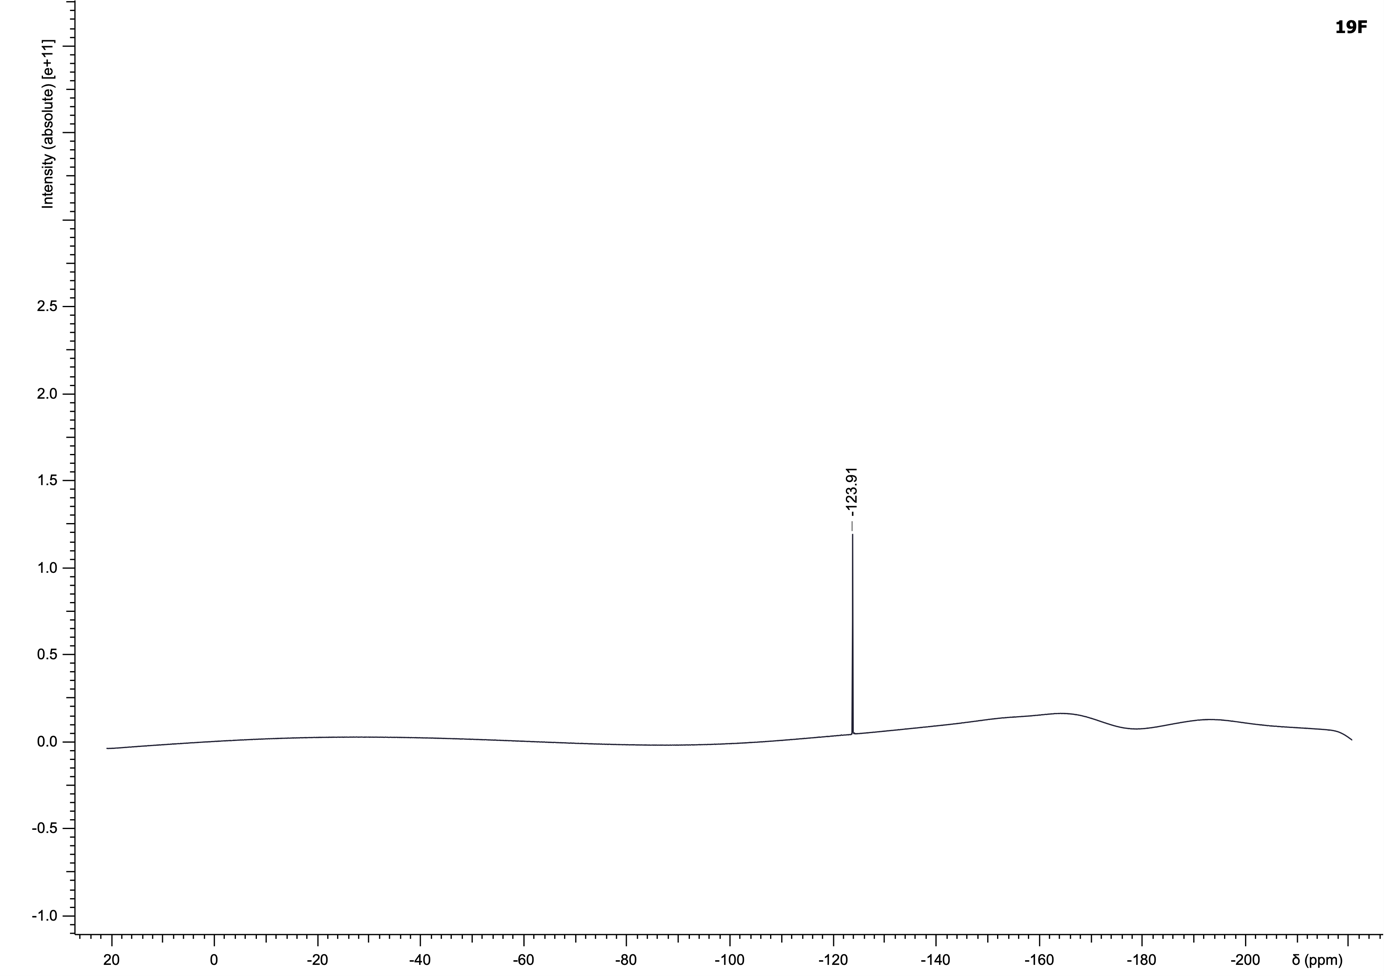


(4-Chlorophenyl)(4-(3,5-dimethylbenzyl)piperazin-1-yl)methanone (45)

Compound **45** was synthesized according to the **General Procedure H** using (4-chlorophenyl)(piperazin-1-yl)methanone (222.53 µmol) and 3,5-dimethylbenzaldehyde as starting materials and purified using cyclohexane/ethyl acetate (10 to 100% ethyl acetate) to yield an orange gel (73.3 mg, 96%).

**LC–MS** (ESI): tR = 2.67 min; > 99% purity (UV at 254 nm);

**1H NMR** (500 MHz, DMSO-*d*6): *δ* 7.50 (d, *J* = 8.4 Hz, 2H), 7.40 (d, *J* = 8.4 Hz, 2H), 6.89 (s, 2H), 6.87 (s, 1H), 3.60 (br s, 2H), 3.43–3.37 (m, 2H), 3.32–3.22 (m, 2H), 2.39 (br s, 2H), 2.32 (br s, 2H), 2.24 (s, 6H);

**13C NMR** (126 MHz, DMSO-*d*6): *δ* 167.8, 137.6 (2C), 137.1 (2C), 134.7, 134.1, 129.0 (2C), 128.5 (2C), 126.7 (2C), 61.9, 52.8, 52.3, 47.2, 41.6, 20.9 (2C);

**HRMS** (ESI+) *m*/*z*: [M+H]+ calculated for C20H23ClN2O, 343.1571; found, 343.1573.


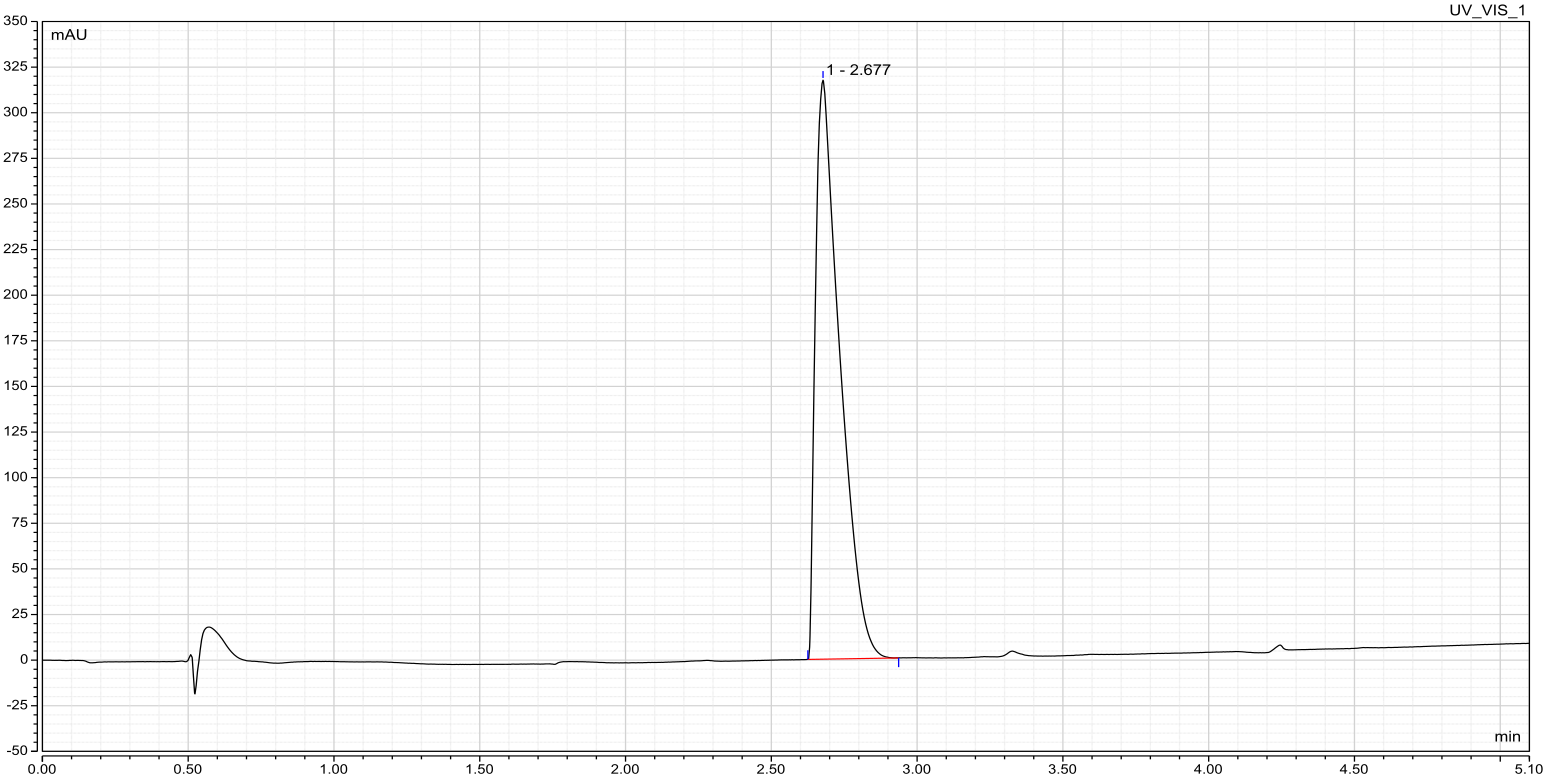


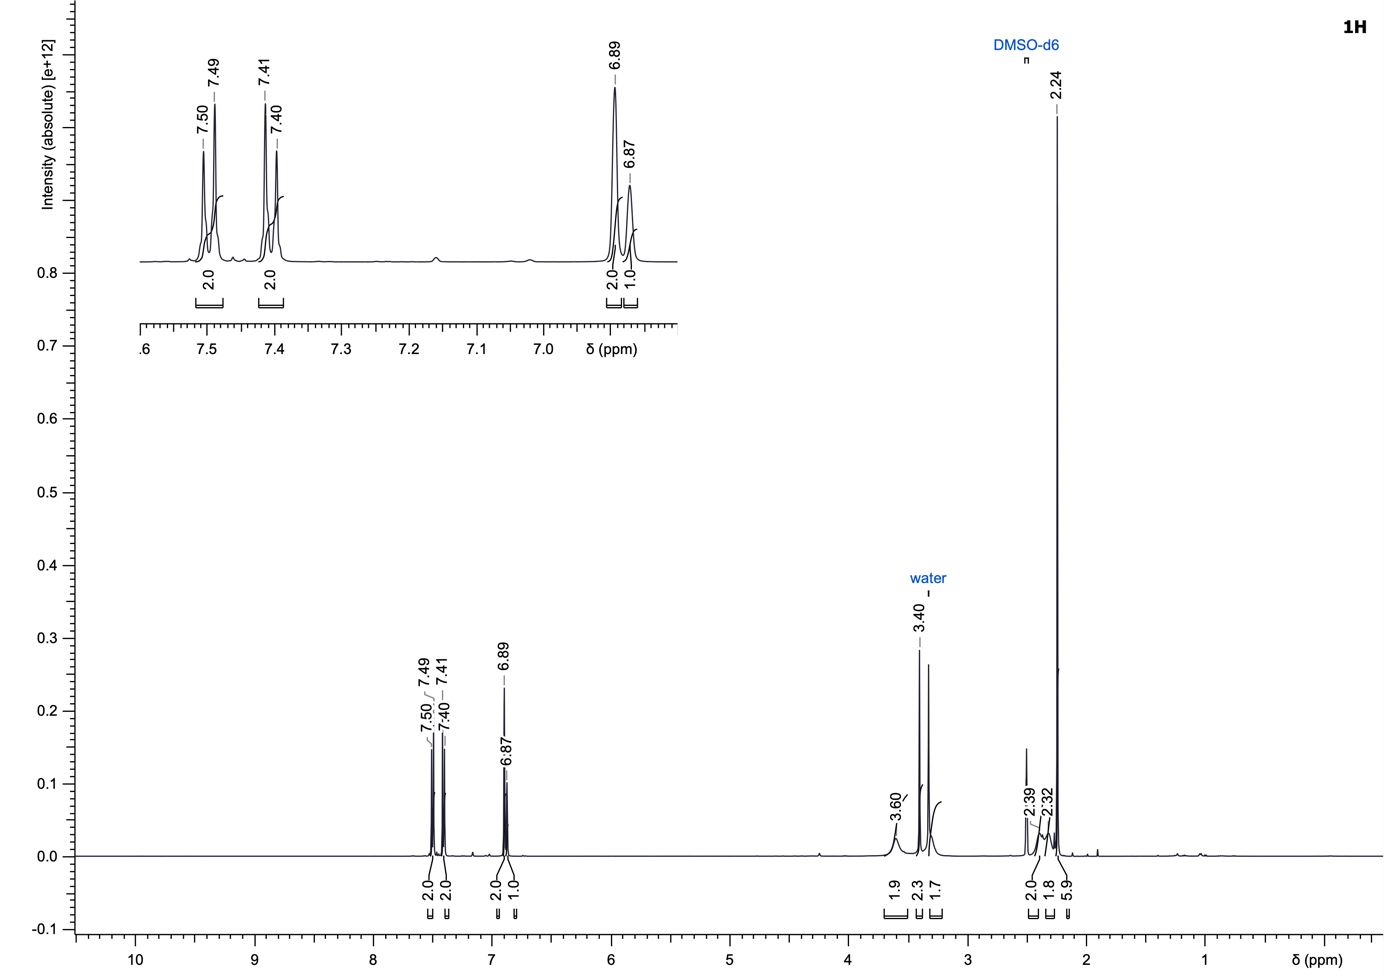


(4-Chlorophenyl)(4-((5-(3-chlorophenyl)furan-2-yl)methyl)piperazin-1-yl)methanone (46)

Compound **46** was synthesized according to the **General Procedure H** using (4-chlorophenyl)(piperazin-1-yl)methanone (173.57 µmol) and 5-(3-chlorophenyl)furan-2-carbaldehyde as starting materials and purified using cyclohexane/ethyl acetate (25 to 100% ethyl acetate) to yield a white solid (63.5 mg, 88%).

**LC–MS** (ESI): tR = 3.09 min; > 99% purity (UV at 254 nm);

**1H NMR** (500 MHz, DMSO-*d*6): *δ* 7.71 (s, 1H), 7.63 (d, *J* = 7.8 Hz, 1H), 7.49 (d, *J* = 8.4 Hz, 2H), 7.46–7.38 (m, 3H), 7.32 (d, *J* = 8.1 Hz, 1H), 7.03 (d, *J* = 3.4 Hz, 1H), 6.45 (d, *J* = 3.4 Hz, 1H), 3.61 (s, 4H), 3.38–3.33 (m, 1H), 3.32–3.27 (m, 1H), 2.54–2.51 (m, 1H), 2.41 (br s, 3H);

**13C NMR** (126 MHz, DMSO-*d*6): *δ* 167.9, 152.1, 150.9, 134.6, 134.2, 133.7, 132.3, 130.8, 128.9 (2C), 128.5 (2C), 127.0, 122.7, 121.8, 111.5, 108.1, 53.7, 52.2, 51.9, 47.1, 41.6;

**HRMS** (ESI+) *m*/*z*: [M+H]+ calculated for C22H20Cl2N2O2, 415.0975; found, 415.0975.

(4-Chlorophenyl)(4-(2-fluoro-4-iodobenzyl)piperazin-1-yl)methanone (47)

Compound **47** was synthesized according to the **General Procedure H** using (4-chlorophenyl)(piperazin-1-yl)methanone (356.05 µmol) and 2-fluoro-4-iodobenzaldehyde as starting materials and purified using cyclohexane/ethyl acetate (10 to 100% ethyl acetate) to yield a white solid (146.2 mg, 90%).

**LC–MS** (ESI): tR = 2.86 min; > 99% purity (UV at 254 nm);

**1H NMR** (500 MHz, DMSO-*d*6): *δ* 7.61 (d, *J* = 9.5 Hz, 1H), 7.56 (d, *J* = 8.1 Hz, 1H), 7.50 (d, *J* = 8.4 Hz, 2H), 7.40 (d, *J* = 8.4 Hz, 2H), 7.20 (t, *J* = 7.9 Hz, 1H), 3.59 (br s, 2H), 3.52 (s, 2H), 3.32–3.23 (m, 2H), 2.42 (br s, 2H), 2.40–2.31 (m, 2H);

**13C NMR** (126 MHz, DMSO-*d*6): *δ* 167.8, 161.5, 159.5, 134.6, 134.2, 133.3 (dd, *J* = 8.7, 4.1 Hz), 129.0 (2C), 128.5 (2C), 124.2 (d, *J* = 14.4 Hz), 124.0 (d, *J* = 23.7 Hz), 93.1 (d, *J* = 8.3 Hz), 54.0, 52.4, 52.0, 47.1, 41.5;

**19F NMR** (470 MHz, CDCl3): *δ*-115.3;

**HRMS** (ESI+) *m*/*z*: [M+H]+ calculated for C18H17ClFIN2O, 459.0131; found, 459.0134.

(4-Chlorophenyl)(4-(4-(2-morpholinoethoxy)phenyl)piperazin-1-yl)methanone (48)

To an oven-dried screw-cap tube were added 4-(2-(4-chlorophenoxy)ethyl)morpholine (64.13 µmol, 1.0 eq), RuPhos Pd G3 (1 %mol), potassium *tert*-butoxide (2.0 eq) and (4-chlorophenyl)(piperazin-1-yl)methanone (1.5 eq). The tube was evacuated and backfilled with Ar (three times), then 1,4-dioxane (0.1 M) was added, after which the tube was sealed and heated at 110 °C overnight. Upon completion, the reaction mixture was cooled to room temperature, diluted with water (5 mL), extracted with dichloromethane (3 × 5 mL), dried over MgSO4 and concentrated under reduced pressure. The crude product was purified by normal-phase flash chromatography on silica gel using a gradient of dichloromethane/methanol (1 to 8% methanol) to yield the desired product **48** as a white solid (7.8 mg, 28%).

**LC–MS** (ESI): tR = 2.49 min; > 99% purity (UV at 254 nm);

**1H NMR** (500 MHz, DMSO-*d*6): *δ* 7.53 (d, *J* = 8.4 Hz, 2H), 7.46 (d, *J* = 8.4 Hz, 2H), 6.90 (d, *J* = 9.1 Hz, 2H), 6.84 (d, *J* = 9.1 Hz, 2H), 4.00 (t, *J* = 5.8 Hz, 2H), 3.74 (br s, 2H), 3.57 (t, *J* = 4.6 Hz, 4H), 3.53–3.39 (m, 2H), 3.05 (br s, 2H), 2.99 (br s, 2H), 2.64 (t, *J* = 5.7 Hz, 2H), 2.49–2.41 (m, 4H);

**13C NMR** (126 MHz, DMSO-*d*6): *δ* 167.9, 152.5, 145.1, 134.6, 134.2, 129.0 (2C), 128.5 (2C), 118.1 (2C), 115.0 (2C), 66.2 (2C), 65.6, 57.1, 53.7 (2C), 50.0 (2C), 47.1, 41.6;

**HRMS** (ESI+) *m*/*z*: [M+H]+ calculated for C23H28ClN3O3, 430.1892; found, 430.1896.

## Supplementary Figures

**Supplementary Fig. 1: Preliminary dual-luciferase assay measuring residual infectivity and cell viability in human coronavirus 229E (HCoV-229E)-infected cells.** Human hepatocellular carcinoma cell lines (Huh-7.5) stably expressing firefly luciferase (FLuc) were infected with HCoV-229E carrying a renilla luciferase (RLuc) reporter. **a** After compound treatment at 10 µM, residual infectivity was quantified by measuring RLuc activity relative to the dimethyl sulfoxide (DMSO)-treated control. **b** FLuc signal was measured in parallel to assess cell viability. The error bars indicate the standard deviation based on three independent measurements.

**Supplementary Fig. 2: Near-native mass spectrometry (MS) reveals binding of fragment 4 to severe acute respiratory syndrome coronavirus 2 (SARS-CoV-2) non-structural protein 10 (Nsp10).** The mass spectrum shows two prominent peak clusters corresponding to multiple charged ions of apo Nsp10. Additional peaks of lower intensity represent the protein–ligand complex, suggesting weak binding under the experimental conditions. The difference in *m*/*z* values between the apo and complex species, when multiplied by the charge state, matches the exact mass of the free base form of fragment **4** (exact mass = 259.99828 Da), thus confirming complex formation under near-native conditions.

Thr5

Gly94

Ala71

Asn40

**Supplementary Fig. 3: Docking poses of fragments 4 and 9 suggest distinct interaction sites on severe acute respiratory syndrome coronavirus 2 (SARS-CoV-2) non-structural protein 10 (Nsp10).** Fragments **4** (left) and **9** (right) were docked into Nsp10 after defining the binding pocket (in green). The two fragments occupy distinct regions within the binding surface, supporting the potential for a fragment linking or merging strategy to enhance binding affinity through simultaneous engagement of multiple sites.

**Supplementary Fig. 4: Docking results of the virtual libraries generated with severe acute respiratory syndrome coronavirus 2 (SARS-CoV-2) non-structural protein 10 (Nsp10).** Molecular docking using SeeSAR 12.1 was performed on the in silico libraries targeting Nsp10. The binding pocket was defined using residues involved in Nsp14 interaction and additional ligand-binding residues reported in the literature. Compounds were ranked according to their estimated binding affinity, torsional strain and key intermolecular interactions. The top-ranked candidates were selected for synthesis and further experimental validation.

**Supplementary Fig. 5: Initial screening for evaluation of the inhibition of severe acute respiratory syndrome coronavirus 2 (SARS-CoV-2) non-structural protein 14 (Nsp14) exoribonuclease (ExoN) activity.** The ExoN activity of Nsp14 (500 nM) was measured in the presence of SARS-CoV-2Nsp10 (2,000 nM) and 2,000 μM of each compound. Compounds were pre-incubated with Nsp10 to promote complex formation before initiating the enzyme reaction with Nsp14 and a ribonucleic acid (RNA) substrate. The absence of RNA degradation served as the functional readout for ExoN inhibition. “C” represents the negative control reaction without enzymes, where the full-length RNA substrate remains intact. “DMSO” represents the positive control reaction carried out with the compound solvent, showing RNA degradation and the formation of small products, used to asses any effect of DMSO on protein activity. Reactions were analysed on a 20% denaturing polyacrylamide gel. DMSO: dimethyl sulfoxide.

**Supplementary Fig. 6: Screening of compounds for antiviral activity against human coronavirus 229E (HCoV-229E) and cytotoxicity.** Residual infectivity and cell viability of HCoV-229E carrying a renilla luciferase (RLuc) reporter in human hepatocellular carcinoma cell lines stably expressing firefly luciferase (Huh-7.5 FLuc) treated with compounds at 10 µM were measured using a dual-luciferase assay. **a** Viral infectivity was monitored in Huh-7.5 FLuc cells infected with an HCoV-229E RLuc reporter virus. **b** Cell viability was assessed in Huh-7.5 FLuc. The values were normalised to the dimethyl sulfoxide (DMSO) solvent control. Compounds exhibiting antiviral activity protected cells from HCoV-229E-induced cell death, resulting in enhanced cell viability relative to the DMSO control. The error bars indicate the standard deviation of three biological replicates.

**Supplementary Fig. 7: Near-native mass spectrometry (MS) reveals binding of compound 37 to severe acute respiratory syndrome coronavirus 2 (SARS-CoV-2) non-structural protein 10 (Nsp10).** **a** The mass spectrum shows two prominent peak clusters corresponding to multiple charged ions of apo Nsp10. Additional peaks of lower intensity represent the protein–ligand complex, suggesting binding under the experimental conditions. The difference in *m*/*z* values between the apo and complex species, when multiplied by the charge state, matches the mass of compound **37** (exact mass = 358.10842 Da), thus confirming complex formation under near-native conditions. **b** The deconvoluted mass spectrum shows one peak corresponding to apo Nsp10 and another peak of lower intensity representing the protein–ligand complex, suggesting binding under the experimental conditions. The difference in *m*/*z* values between the apo and complex species, matches the mass of compound **37**, thus confirming complex formation under near-native conditions.

**Supplementary Fig. 8: Screening of compounds for antiviral activity against severe acute respiratory syndrome coronavirus 2 (SARS-CoV-2).** Residual infectivity of SARS-CoV-2 in Calu-3 cells treated with compounds at 10 µM was measured by SARS-CoV-2 specific quantitative reverse-transcription polymerase chain reaction (qRT-PCR). Ribonucleic acid (RNA) was extracted from the supernatants. Infectivity is expressed as a percentage relative to dimethyl sulfoxide (DMSO)-treated infected controls (N = 2–4 technical replicates; N = 1–2 biological replicates).

## Supplementary Notes

### List of Abbreviations

| 2′-*O*-MTase | 2′-*O*-methyltransferase |
| --- | --- |
| *A*280 | absorption at 280 nm |
| ACE2 | angiotensin-converting enzyme 2 |
| ACL | *Academia das Ciências de Lisboa* |
| ATP | adenosine triphosphate |
| B | blank |
| br | broad |
| C | compound |
| Cap-1 | viral mRNA cap structure with methylation of the 2′-*O* position of the first nucleotide |
| CC50 | 50% cytotoxic concentration |
| cLogP | calculated logarithm of the *n*-octanol/water partition coefficient |
| CNRS | *Centre National de la Recherche Scientifique* |
| COVID-19 | coronavirus disease 2019 |
| CV | column volume |
| d | doublet |
| DCM | dichloromethane |
| dd | doublet of doublets |
| ddd | doublet of doublets of doublets |
| DFG | *Deutsche Forschungsgemeinschaft* |
| DIPEA | *N*,*N*-diisopropylethylamine |
| DMF | dimethylformamide |
| DMSO | dimethyl sulfoxide |
| dt | doublet of triplets |
| DTT | dithiothreitol |
| DZIF | *Deutsches Zentrum für Infektionsforschung* |
| DZL | *Deutsches Zentrum für Lungenforschung* |
| E | envelope |
| EDC·HCl | *N*-ethyl-*N*′-(3-dimethylaminopropyl)carbodiimide hydrochloride |
| EDTA | ethylenediaminetetraacetic acid |
| EG | ethylene glycol |
| EMA | European Medicines Agency |
| ESI | electrospray ionisation |
| EVA-GLOBAL | European Virus Archive GLOBAL |
| EXC | Cluster of Excellence |
| ExoN | exoribonuclease |
| FA | formic acid |
| FBDD | fragment-based drug discovery |
| FCT | *Fundação para a Ciência e a Tecnologia I.P.* |
| FLuc | firefly luciferase |
| FT-ICR | Fourier-transform ion cyclotron resonance |
| GARDP | Global Antibiotic Research & Development Partnership |
| HCoV-229E | human coronavirus 229E |
| HEFL | halogen-enriched fragment library |
| HEPES | 2-[4-(2-hydroxyethyl)piperazin-1-yl]ethane-1-sulfonic acid |
| HIPS | *Helmholtz-Institut für Pharmazeutische Forschung Saarland* |
| HOBt | *N*-Hydroxybenzotriazole |
| HP | high performance |
| HPLC | high-performance liquid chromatography |
| HRMS | high-resolution mass spectrometry |
| Huh-7.5 FLuc | human hepatocellular carcinoma cell lines stably expressing firefly luciferase |
| HZI | *Helmholtz-Zentrum für Infektionsforschung* |
| IC50 | half-maximal inhibitory concentration |
| IPTG | isopropyl-β-D-thiogalactoside |
| *J* | coupling constant |
| *K*D | dissociation constant |
| LB | lysogeny broth |
| LC–MS | liquid chromatography–mass spectrometry |
| LCI | *Institut für Lebensmittelchemie* |
| LDH | lactate dehydrogenase |
| LLE | ligand-lipophilicity efficiency |
| M | membrane |
| m | multiplet |
| MHH | *Medizinische Hochschule Hannover* |
| Mpro | main protease |
| MS | mass spectrometry |
| MW | microwave |
| N | nucleocapsid |
| N.C. | not calculable |
| N.T. | not tested |
| *N*7-MTase | *N*7-methyltransferase |
| NHS | *N*-hydroxysuccinimide |
| NMR | nuclear magnetic resonance |
| Nsp | non-structural protein |
| OD600 | optical density at 600 nm |
| ORF | open reading frame |
| PBS | phosphate-buffered saline |
| Pd(dppf)Cl2 | dichloro[1,1′-bis(diphenylphosphino)ferrocene]palladium(II) |
| Pd(PPh3)4 | tetrakis(triphenylphosphine)palladium(0) |
| PDB | protein data bank |
| PMSF | phenylmethylsulfonyl fluoride |
| pp1a | polyprotein 1a |
| pp1ab | polyprotein 1ab |
| PPI | protein–protein interaction |
| ppm | parts per million |
| pRSF-Duet-1-Amp | pRSF-Duet-1 carrying an ampicillin resistance gene |
| PSH | PharmaScienceHub |
| q | quartet |
| qRT-PCR | quantitative reverse-transcription polymerase chain reaction |
| quint | quintet |
| RdRp | RNA-dependent RNA polymerase |
| RIU | refractive index unit |
| RIU | refractive index unit |
| RLuc | renilla luciferase |
| RNA | ribonucleic acid |
| RT | room temperature |
| RU | response unit |
| S | spike |
| s | singlet |
| SAM | *S*-adenosylmethionine |
| SAR | structure–activity relationship |
| SARS-CoV-2 | severe acute respiratory syndrome coronavirus 2 |
| SDF | structure-data file |
| SDS-PAGE | sodium dodecyl sulfate-polyacrylamide gel electrophoresis |
| sept | septet |
| sext | sextet |
| SMILES | simplified molecular input line entry system |
| SPR | surface plasmon resonance |
| STD | saturation-transfer difference |
| t | triplet |
| T3P | propylphosphonic anhydride |
| TB | terrific broth |
| td | triplet of doublets |
| tdDCC | target-directed dynamic combinatorial chemistry |
| TEA | triethylamine |
| TEV | tobacco etch virus |
| TFA | trifluoroacetic acid |
| TMS | tetramethylsilane |
| UHPLC | ultra-high-performance liquid chromatography |
| UPS | *Université Toulouse III–Paul Sabatier* |
| UV | ultraviolet |
